# Supplementary material
Source: PubMed Central journal article supplement (PMC6744942)
Supplement: NIHMS1526386-supplement-1.pdf [file NIHMS1526386-supplement-1.pdf]

## **Supplementary Materials and Methods**

### **Cells and Reagents**

Heparinized blood was obtained from consenting patients with a confirmed diagnosis of CLL; collected with approval by the Mayo Clinic Jacksonville Institutional Review Board, in accordance with the Declaration of Helsinki. Peripheral blood mononuclear cells (PBMCs) were isolated by Ficoll gradient from CLL patients (n=36) as well as from healthy human donors (n=5) for cell death assays, serving as effector cells. CD19+ CLL cells were selected out by magnetic bead separation followed by CD5+ cell selection using Biotin conjugated anti human CD5 (EasySep™ Human CD19 Positive Selection kit and EasySep™ Release Human Biotin Positive Selection Kit, StemCell Technologies, Vancouver BC, Canada). In most experiments we additionally used purified CD19+/CD38<sup>hi</sup> and CD19+/CD38<sup>lo</sup> CLL patient cells. Briefly, CD19+/CD5+ B cells from CLL patients were sorted using automatic magnetic sorter (RoboSep™, Stemcell Technologies, MA, USA) followed by staining with APC conjugated anti-CD38 antibody and flow sorted using FACS Aria II (BD Biosciences, San Jose, CA, USA) according to manufacturer's instructions. Cells were then treated with trypsin-EDTA for 10 min and washed twice followed by culture in AIM-V serum-free media for  $\geq 24$ h. CD38 expression in purified cells was again reassessed using a multi-epitope FITC conjugated anti-CD38 antibody (Cytognos CD38 multi-epitope-FITC antibody, Ref: CYT-38F2). Post-sorted purity was validated using an Attune NxT flow cytometer (Invitrogen, MA, USA). JVM13 (CD38+) and MEC1 (CD38-) cell lines were obtained from DSMZ and used in some experiments. All cells were cultured per conditions previously described.<sup>1, 2</sup> Ibrutinib and kuromanin were purchased from SelleckChem (Houston, TX, USA). Daratumumab was acquired through clinical sources.

### **CD38 and FcγRIII expression analysis**

CD38 expression and mean fluorescence intensity (MFI) on CD19+/CD5+ CLL cells was determined using a PE conjugated anti-CD38 antibody on an Attune NxT flow cytometer (Invitrogen, MA, USA). Quantification of CD38 cell surface molecules was determined using BD Quantibrite™ beads (BD Biosciences, NJ, USA), followed by analysis on BD QuantiCALC™ software (BD Biosciences, NJ, USA) and with data expressed as number of antibodies bound per cells (sAbc). Expression of FcγRs on CD19+CD5+ primary CLL cells was determined by labelling with antibodies for FcγRI (CD64, Biolegends, CA, USA), FcγRII (CD32, Biolegends, CA, USA) and FcγRIII, (CD16, BD Pharmingen, MN, USA)]. After 20 min of incubation in dark, cells were analyzed on a flow cytometer (Attune NxT, Invitrogen, CA, USA), using appropriate isotype control. Data are represented as % expression of FcγRs.

## **Cell death assays**

### **Antibody-dependent cell mediated cytotoxicity (ADCC)**

ADCC was carried out as described by de Weers et al.<sup>3</sup> Target cells were labeled with Calcein-AM (1μM, 30 minutes, 37°C in dark; ThermoFisher Scientific, Waltham, MA, USA); subsequently, washed thrice with PBS; plated in triplicate at  $1 \times 10^4$  cells/well in 96-well round bottom plates. Cells were pre-incubated (15 minutes, 37°C in dark) with isotype control (IgG1-b12, 0.1μg/mL), vehicle control (DMSO, 0.001%), ibrutinib (1μM), daratumumab (0.1μg/mL) or combination of ibrutinib and daratumumab (ID). Daratumumab and ibrutinib doses for *in vitro/ex vivo* studies have been previously established.<sup>4-6</sup> Isotype IgG1-b12 antibody was added instead of mAb to determine spontaneous calcein release and Triton X-100 (1%) was used to determine the maximal calcein release. Thereafter, fresh human PBMCs were added at an Effector: Target (E:T) ratio of 50:1 (optimized in a previous report)<sup>3</sup> and cells were incubated for 6 hours at 37°C in dark. The plates were centrifuged, supernatant transferred into glass bottom black plates (ThermoFisher Scientific, Waltham, MA, USA) and fluorescence was measured in a Synergy spectrophotometer (Bio-Tek,

Winooski, VT, USA) (excitation laser: 488nm ± 10; band-pass filter: 520nm ± 20). The % of cellular cytotoxicity was calculated using the following formula:

$$\text{Specific lysis} = 100 \times \frac{\text{Experimental release (RFU)} - \text{Spontaneous release (RFU)}}{\text{Maximal release (RFU)} - \text{Spontaneous release (RFU)}}$$

### **Complement-dependent cytotoxicity (CDC)**

CDC was determined in a manner similar to ADCC where Calcein-AM-labeled CLL cells were pre-incubated with IgG1-b12 (0.1µg/mL), DMSO (0.001%), ibrutinib (1µM), daratumumab (0.1µg/mL) or ID. 10% normal human serum was added and incubated with CLL cells for 1hr at 37°C. Cell viability and specific lysis was determined per the formula in the ADCC assay and as described by de Weers et al.<sup>3</sup>

### **Antibody-dependent cellular cytotoxicity (ADCP)**

Macrophages (Mφ) were generated from peripheral blood monocytes, isolated from healthy human donors. Monocytes were cultured for 7 days in DMEM supplemented with 10% FBS, 2 mM L-glutamine, 50 µg/mL / 50 U/mL penicillin/streptomycin, and granulocyte-macrophage colony-stimulating factor (10 ng/mL); the culture medium was renewed every 3 days. Macrophages were detached on day 7 with 0.1% trypsin-EDTA and characterized by flow cytometry (CD11b+; BD Biosciences, CA USA). Macrophages were seeded at 2×10<sup>5</sup> cells/well into tissue culture treated 24-well plates and allowed to adhere overnight at 37°C in dark. Phagocytosis (ADCP) was assessed with similar treatment as ADCC and CDC assays where Calcein-AM-labeled CLL cells were pre-incubated with IgG1-b12 (0.1µg/mL), DMSO (0.001%), ibrutinib (1µM), daratumumab (0.1µg/mL) or ID combination. After 6h of incubation, the non-phagocytosed target cells were collected. Macrophages were detached with 0.1% trypsin-EDTA, stained for CD11b-phycoerythrin expression and added to the nonphagocytosed target cells,. The

amount of doubly positive target cells (CD11b-phycoerythrin and calcein) was determined on an Attune NxT flow cytometer (Invitrogen, MA, USA).

### **Apoptosis assay**

To measure % apoptosis, dual staining for Annexin V-FITC and propidium iodide (PI) or 7AAD in CLL cells treated for 24h with IgG1-b12 control Ab (0.1µg/mL), kuromanin (10uM), daratumumab (0.1 µg/mL), ibrutinib (1µM), ID or IK combination was performed as previously described.<sup>7,8</sup> FcγR cross linking-dependent apoptosis was measured in primary CLL cells after blocking with or without pan-FcγR blocker (Human TruStain FcX, Biolegend, San Diego, CA) for 1h (±FcX) followed by treated with isotype IgG1 Ab (control), daratumumab (Dara, 0.1ug/mL) for 24h and subsequent staining with annexin-V and 7ADD; data were analysed using flow cytometric analysis. Comparative significance analyses between the groups (brackets) show p-values. p<0.05 was considered as statistically significant.

### **Determination of mitochondrial membrane potential**

Mitochondrial membrane potential was measured using the The MitoProbe™ DiIC<sub>1</sub>(5) Assay Kit (Invitrogen, MA, USA). Cells ( $5 \times 10^5$ ) were incubated with kuromanin (10uM), daratumumab (0.1 µg/mL), ibrutinib (1µM) or ID for 24 h, followed by loading with with 250 ng/ml of DiIC<sub>1</sub>(5). Mitochondrial membrane potential was analyzed on an Attune NxT flow cytometer (Invitrogen, MA, USA).

### **Immunoblotting**

Immunoblotting was performed using cell lysates as described after treatment.<sup>9,10</sup> Briefly, protein-containing immunoblot were incubated overnight at 4°C with antibodies against Lyn, Syk, BTK, PLCγ<sub>2</sub>, ERK1/2, AKT and their phosphorylated isoforms; as well as GAPDH (Cell Signaling Technology, MA, USA). After incubation with corresponding secondary antibody, the protein

bands were visualized using a chemiluminescent substrate and analysed by GE Amersham imager 600 (GE Healthcare Bio-Sciences, PA, USA). Densitometry analysis was performed using GelQuant software (BioChem Solutions, CA USA) and data was normalized to loading control (GAPDH).

### **In vivo disseminated-disease leukemia xenograft model**

A partially humanized mouse model of CLL was established in a manner as previously reported by de Weers et al, Nijhof et al and Herman et al.<sup>4, 11,12</sup> All experiments were conducted in accordance with the Mayo Clinic Institutional Animal Care and Use Committee (IACUC) and institutional guidelines. Briefly, luciferase-labeled JVM13 B-leukemia cells (JVM13-Luc,  $8 \times 10^6$  cells) were injected I.V. into the tail veins of NSG (NOD.Cg-Prkdcscid Il2rgtm1Wjl/SzJ) mice (The Jackson Laboratory). After 7 days, mice were randomized to receive either 1. vehicle (control, I.P.), 2. Effector cells only (healthy donor PBMCs,  $8 \times 10^6$  cells, I.V.), 3. Daratumumab alone on a weekly schedule (10 mg/kg, I.P.), 4. ibrutinib (6mg/kg, I.P.), 5. daratumumab + effector cells, 6. Ibrutinib + effectors, 7. Ibrutinib and daratumumab (ID) combination and 8. ID combination + effectors. This treatment schema is largely consistent with prior investigations of daratumumab.<sup>4, 11,12</sup> An initial saturating dose of daratumumab (20 mg/kg, I.P.) was administered to mice on day 8 after tumor implantation, thereafter followed by a 10 mg/kg dose given on days 11, 15, 20 and 26. In the daratumumab-receiving study arm, effector cells were given 1 day before the daratumumab injection. Tumor burden was quantified by bioluminescent signal intensity on an IVIS imaging machine and body weight was calculated on the same days also. Mice in the treatment groups that received effector cells were euthanized on day 30 to avoid any possibility of graft-versus-host disease-like symptoms, which could impact the results of the study.

### **Statistical analysis**

ADCC, CDC and ADCP experiments were performed using primary CLL cells; plated in triplicate, and in some cases performed twice where sufficient number of cells were available. Results are expressed as mean  $\pm$  SEM, mean  $\pm$  SD or mean  $\pm$  range (where applicable). Statistical analysis comparing results in cell death assays and protein expression were evaluated by non-parametric Mann–Whitney test or non-parametric Kruskal Wallis multiple comparison test (as applicable), using Graph Pad Prism software, version 5 (La Jolla, CA, USA);  $p < 0.05$  was considered as statistically significant. Spearman's test of correlation was used to determine association between CD38 expression and cell death; performed using R Statistical Software (version 3.1.1; R Foundation for Statistical Computing, Vienna, Austria). Overall survival was determined by Kaplan Meir analysis.

## References:

1. Paulus A, Masood A, Miller KC, Khan AN, Akhtar D, Advani P, *et al.* The investigational agent MLN2238 induces apoptosis and is cytotoxic to CLL cells in vitro, as a single agent and in combination with other drugs. *Br J Haematol* 2014 Apr; **165**(1): 78-88.
2. Chitta KS, Khan AN, Ersing N, Swaika A, Masood A, Paulus A, *et al.* Neem leaf extract induces cell death by apoptosis and autophagy in B-chronic lymphocytic leukemia cells. *Leuk Lymphoma* 2014 Mar; **55**(3): 652-661.
3. De Weers M, Tai Y-T, van der Veer MS, Bakker JM, Vink T, Jacobs DC, *et al.* Daratumumab, a novel therapeutic human CD38 monoclonal antibody, induces killing of multiple myeloma and other hematological tumors. *The Journal of Immunology* 2011; **186**(3): 1840-1848.
4. de Weers M, Tai YT, van der Veer MS, Bakker JM, Vink T, Jacobs DC, *et al.* Daratumumab, a novel therapeutic human CD38 monoclonal antibody, induces killing of

- multiple myeloma and other hematological tumors. *J Immunol* 2011 Feb 01; **186**(3): 1840-1848.
5. Matas-Cespedes A, Vidal-Crespo A, Rodriguez V, Villamor N, Delgado J, Gine E, *et al.* The Human CD38 Monoclonal Antibody Daratumumab Shows Antitumor Activity and Hampers Leukemia-Microenvironment Interactions in Chronic Lymphocytic Leukemia. *Clin Cancer Res* 2016 Sep 16.
  6. Ponader S, Chen SS, Buggy JJ, Balakrishnan K, Gandhi V, Wierda WG, *et al.* The Bruton tyrosine kinase inhibitor PCI-32765 thwarts chronic lymphocytic leukemia cell survival and tissue homing in vitro and in vivo. *Blood* 2012 Feb 02; **119**(5): 1182-1189.
  7. Manna A, De Sarkar S, De S, Bauri AK, Chattopadhyay S, Chatterjee M. The variable chemotherapeutic response of Malabaricone-A in leukemic and solid tumor cell lines depends on the degree of redox imbalance. *Phytomedicine* 2015 Jul 15; **22**(7-8): 713-723.
  8. Paulus A, Akhtar S, Caulfield TR, Samuel K, Yousaf H, Bashir Y, *et al.* Coinhibition of the deubiquitinating enzymes, USP14 and UCHL5, with VLX1570 is lethal to ibrutinib- or bortezomib-resistant Waldenstrom macroglobulinemia tumor cells. *Blood Cancer J* 2016 Nov 04; **6**(11): e492.
  9. Manna A, De Sarkar S, De S, Bauri AK, Chattopadhyay S, Chatterjee M. The variable chemotherapeutic response of Malabaricone-A in leukemic and solid tumor cell lines depends on the degree of redox imbalance. *Phytomedicine* 2015; **22**(7): 713-723.
  10. Paulus A, Akhtar S, Yousaf H, Manna A, Paulus SM, Bashir Y, *et al.* Waldenstrom macroglobulinemia cells devoid of BTKC481S or CXCR4WHIM-like mutations acquire resistance to ibrutinib through upregulation of Bcl-2 and AKT resulting in vulnerability towards venetoclax or MK2206 treatment. *Blood Cancer J* 2017 May 26; **7**(5): e565.
  11. Nijhof IS, Groen RW, Lokhorst HM, van Kessel B, Bloem AC, van Velzen J, *et al.* Upregulation of CD38 expression on multiple myeloma cells by all-trans retinoic acid improves the efficacy of daratumumab. *Leukemia* 2015 Oct; **29**(10): 2039-2049.
  12. Herman SE, Wiestner A. Preclinical modeling of novel therapeutics in chronic lymphocytic leukemia: the tools of the trade. *Semin Oncol* 2016 Apr; **43**(2): 222-232.

## Supplementary Figure Legends.

### **Supplemental Figure 1. Flow-sorting strategy used to enrich for CD19+CD5+/CD38<sup>hi</sup> and CD19+CD5+/CD38<sup>lo</sup> primary CLL cells.**

CD19+CD5+ cells were first selected out from the peripheral blood mononuclear cells of patients with a confirmed diagnosis of CLL by magnetic bead selection and labeled with an anti-CD38 APC antibody. CD19+CD5+ cells were gated based on forward scatter /side scatter (upper panel, green box) followed by doublet discrimination (middle red outlined box) and dot plots for CD38 APC (lower panel, blue box) positive cells. After that, CD9+CD5+CD38 APC-labelled cells were gated similarly (all middle panel, respectively; red box outline). By using the same gating panel, post sort purity of CD38+ and CD38- cells were validated.

### **Supplemental Figure 2. Validation of CD38 epitope recovery following labeling and flow sorting of CLL cells with an anti-CD38 antibody.**

**A.** Schema illustrating methodology implemented to determine recovery of the CD38 epitope to which daratumumab binds. Briefly, CD19+/CD5+ cells were selected for by magnetic bead separation from the PBMCs of patients with a confirmed diagnosis of CLL. One aliquot was untreated and a second aliquot treated with daratumumab (0.1ug/mL, 2hr). Subsequently, both aliquots were labeled with either anti-CD38 APC-conjugated Ab (**Panel B**) or a novel detection antibody that binds CD38 at 2 distinct epitopes (Cytognos CD38 multi-epitope-FITC antibody, Ref: CYT-38F2, **Panel C**). In the aliquot that was treated with daratumumab, it was clear that daratumumab binds to an epitope similar to an anti-CD38 APC Ab as ~0.04% of cells were detected as being CD38+ (**Panel D**). However, by using the multi-epitope anti-CD38 FITC Ab, we detected ~36% of CD38+ cells (vs. ~38% CD38+ cells in untreated counterparts) as shown in **Panel E**. Next, to determine whether trypsinization, washing and 24hr recovery of CLL cells would sufficiently wash off any detection Ab that competes with Daratumumab binding, we labeled untreated CD19+/CD5+ CLL cells with an anti-CD38 PE Ab; followed by treatment with trypsin-EDTA for 10 min and washing (twice) and culturing in AIM-V serum-free media for 24h. These cells were then labeled with either anti-CD38 APC or multiepitope anti-CD38 FITC and CD38+ cells analyzed for. Indeed, CLL cells under both conditions; using 2 distinct anti-CD38 Abs shows that our recovery process results in virtually identical CD38 expression and detection pre- and post-trypsinization (**compare Panel B and F**) with either an APC conjugated Ab or a multiepitope FITC conjugated Ab (**compare C and G**).

### **Supplemental Figure 3. CD38 expression and immune-effector mediated cytotoxicity by daratumumab in CLL cell lines, JVM13 and MEC1.**

**A.** CD38 expression in JVM13 and MEC1 cells. Immune-mediated and direct anti-tumor effects of ibrutinib, daratumumab (Dara) or the Ibr + Dara combination were evaluated in CD38+ JVM13 and CD38- MEC1 CLL cell lines. **B.** MEC1 or JVM13 cells (targets) were labeled with Calcein-AM and cocultured with or without healthy donor PBMCs (effectors) at an E:T ratio of 50:1 for 4hr. Specific lysis from ADCC was calculated as described in the Materials & Methods section. Spontaneous release was determined using IgG1-b12 isotype antibody [0.1µg/mL]. **C.** Similarly, CDC was measured in Calcein-AM labeled MEC1 or JVM13 cells incubated with human serum (10%) from a healthy donor for 1hr and effect of ibrutinib, Dara or combination



treatment was determined. **D.** ADCP was examined in Calcein-AM labeled CLL cell lines treated with either Ibr, Dara or Ibr + Dara by incubating target tumor cells with human monocyte-derived macrophages (effectors) from a healthy donor at an E:T ratio of 2:1. Flow cytometry analysis to detect CD11b<sup>+</sup> macrophage engulfment of calcein-labeled tumor cells was used to calculate %phagocytosis.

**Supplemental Figure 4. Scatterplots for where a correlation between cell death (CDC, ADCP, apoptosis) and CD38 expression was noted.**

**Supplemental Figure 5. Daratumumab induces apoptosis in JVM13 and MEC1 cells.**

Apoptosis was measured in MEC1 or JVM13 cells treated with isotype IgG1 Ab (control), daratumumab (Dara, 0.1ug/mL), ibrutinib (Ibr, 1uM) or Ibr + Dara (ID) for 24h, followed by staining with annexin-V/propidium iodide (PI) and flow cytometry analysis. Comparative significance analyses between the groups (brackets) show p-values.  $p \leq 0.05$  was considered statistically significant.

**Supplemental Figure 6. FcγR expression in CD19+CD5+ CLL cells.**

Surface expression (%) of three FcγR's namely FcγRI (CD64); FcγRII (CD32) and FcγRIII (CD16) were measured on primary CLL cells isolated from 5 patients by flow cytometry. Data are represented as % expression of different FcγR's. A representative CLL patients (Pt. 8) scatter plots for each of the three FcγR's is shown.

**Supplemental Figure 7. Basal expression of B-cell receptor (BCR) signaling proteins is higher in CLL cells from patients with CD38+ disease.**

Proteins associated with BCR signaling were examined by western blot and densitometry analysis. **A - F.** Phosphorylated (p-) and total protein levels for Lyn, Syk, BTK, PLCγ2 and ERK1/2 as well as AKT were probed for using anti-human Ab's against the aforementioned proteins in primary CD19+ CLL cells. A comparative analysis of baseline expression of BCR signaling proteins relative to GAPDH (in Non-IgM stimulated) CLL cells from clinically defined CD38+ patients (n=5) or CD38- patients (n=5) disease was performed. \* $p \leq 0.05$ , \*\*  $p \leq 0.001$

**Supplemental Figure 8. Comparative analysis of BCR signaling protein expression in CLL cells from CD38+ or CD38- disease after ex vivo treatment with daratumumab or ibrutinib + daratumumab.**

Proteins associated with BCR signaling were examined by western blot and densitometry analysis. **A - F.** Phosphorylated (p-) and total protein levels for Lyn, Syk, BTK, PLCγ2 and ERK1/2 as well as AKT were probed for using anti-human Ab's against the aforementioned proteins in primary CD19+ CLL cells, which were treated (for 2hr) with 1uM Daratumumab (D) +/- 1uM ibrutinib (ID). First, baseline expression of BCR signaling proteins relative to GAPDH was determined, followed by a comparative analysis of the % change in these proteins in CLL cells from CD38+ patients (n=5) or CD38- patients (n=5) after treatment with D or ID compared to IgG1-treated control cells. \* $p \leq 0.05$ , \*\*  $p \leq 0.001$

**Supplemental Figure 9. Targeting CD38 with kuromanin or daratumumab downregulates expression of B-cell receptor (BCR) signaling proteins and its effects are augmented by**

### **ibrutinib.**

Proteins associated with BCR signaling were examined by western blot and densitometry analysis. **A - F.** Phosphorylated (p-) and total protein levels for Lyn, Syk, BTK, PLC $\gamma$ 2 and ERK1/2 as well as AKT were probed for using anti-human Ab's against the aforementioned proteins in primary CD19+ CLL cells, which were treated (for 2hr) with DMSO (control), ibrutinib (Ibr), kuromanin (Kuro) or the combination of the two agents. **G.** Representative western blots from a CD38+ and CD38- CLL Pt. are shown. **H.** Similarly, we performed western blot analysis in flow-sorted CD19+/CD38<sup>hi</sup> and CD19+/CD38<sup>lo</sup> cells from Pt. 19, treated with daratumumab (Dara) +/- Ibr and probed for pBTK, BTK, PLC $\gamma$ 2 and pPLC $\gamma$ 2 for 2hr. Comparative significance analyses between the groups (brackets) show p-values.  $p \leq 0.05$  was considered as statistically significant.

### **Supplemental Figure 10. Ibrutinib does not decrease CD38 MFI in CD38- primary CLL cells.**

CD19+ cells from CD38+ Pts. (1, 2, 9 and 11) and CD38- Pts. (3, 4, 5, 6 and 8) were treated ex vivo with ibrutinib (Ibr, 1 $\mu$ m) or DMSO for 24h. Cells were washed twice and labeled with anti-CD38 Ab, followed by flow cytometry analysis for determination of CD38 expression. % CD38+ cells pre-and post-Ibr are shown **A.** and **B.** CD38 MFI in was also assessed in a similar manner pre-and post-Ibr exposure in **C.** CD38+ cells and **D.** CD38- CLL Pt. cells. While increase in MFI was noted in CD38+ and CD38- cells, the change was not statistically significant. Experiments were performed in triplicate.

### **Supplemental Figure 11. Daratumumab or kuromanin +/- ibrutinib induce apoptosis of CLL cells (analysis with secondary probe using 7AAD).**

Apoptosis was measured in primary CLL cells (n=7 patients), treated with isotype IgG1 Ab (control), daratumumab (Dara, 0.1 $\mu$ g/mL), ibrutinib (Ibr, 1 $\mu$ M) or Ibr + Dara (ID) as well as kuromanin (10 $\mu$ M) +/- Ibr, for 24h, followed by staining with annexin-V/7AAD and flow cytometry analysis.  $p \leq 0.05$  was considered as statistically significant.

### **Supplemental Figure 12. Targeting CD38 with daratumumab or kuromanin +/- ibrutinib disrupts mitochondrial membrane permeability in CLL cells.**

Change in mitochondrial transmembrane permeability was examined in CLL cells from 30 patients treated with isotype IgG1 control Ab, daratumumab (Dara, 0.1 $\mu$ g/mL), ibrutinib (Ibr, 1 $\mu$ M) or Ibr + Dara (ID) as well as kuromanin (10 $\mu$ M) +/- Ibr, for 24h, using a membrane-potential-sensitive cyanine dye DiIC<sub>1</sub>(5), which accumulates in the mitochondria. A decrease in DiIC<sub>1</sub>(5) MFI represents an increase in mitochondrial transmembrane permeability and is associated with mitochondrial-mediated apoptosis. **A.** All CLL cells (n=30 patients) and **B.** Subset analysis in CLL cells from CD38+ and CD38- patients is shown. **C.** Histograms illustrating change in  $\Delta\Psi_m$  due to Dara from representative CD38+ CLL case (Pt. 9) and a CD38- case (Pt. 8). DiIC<sub>1</sub>(5) MFI amplitude with a left shift on the horizontal axis indicate lower MFI (increased membrane permeability and disruption in  $\Delta\Psi_m$ ). **D - G.** A similar analysis was separately performed in flow-sorted CD19+/CD38<sup>hi</sup> and CD19+/CD38<sup>lo</sup> CLL cells from 5 patients treated with the aforementioned agents. Results expressed as mean  $\pm$  SEM. Comparative significance analyses between the groups (brackets) show p-values.  $p \leq 0.05$  was considered as statistically significant.

Supplemental Figure 1.

CD19+/CD5+ cells

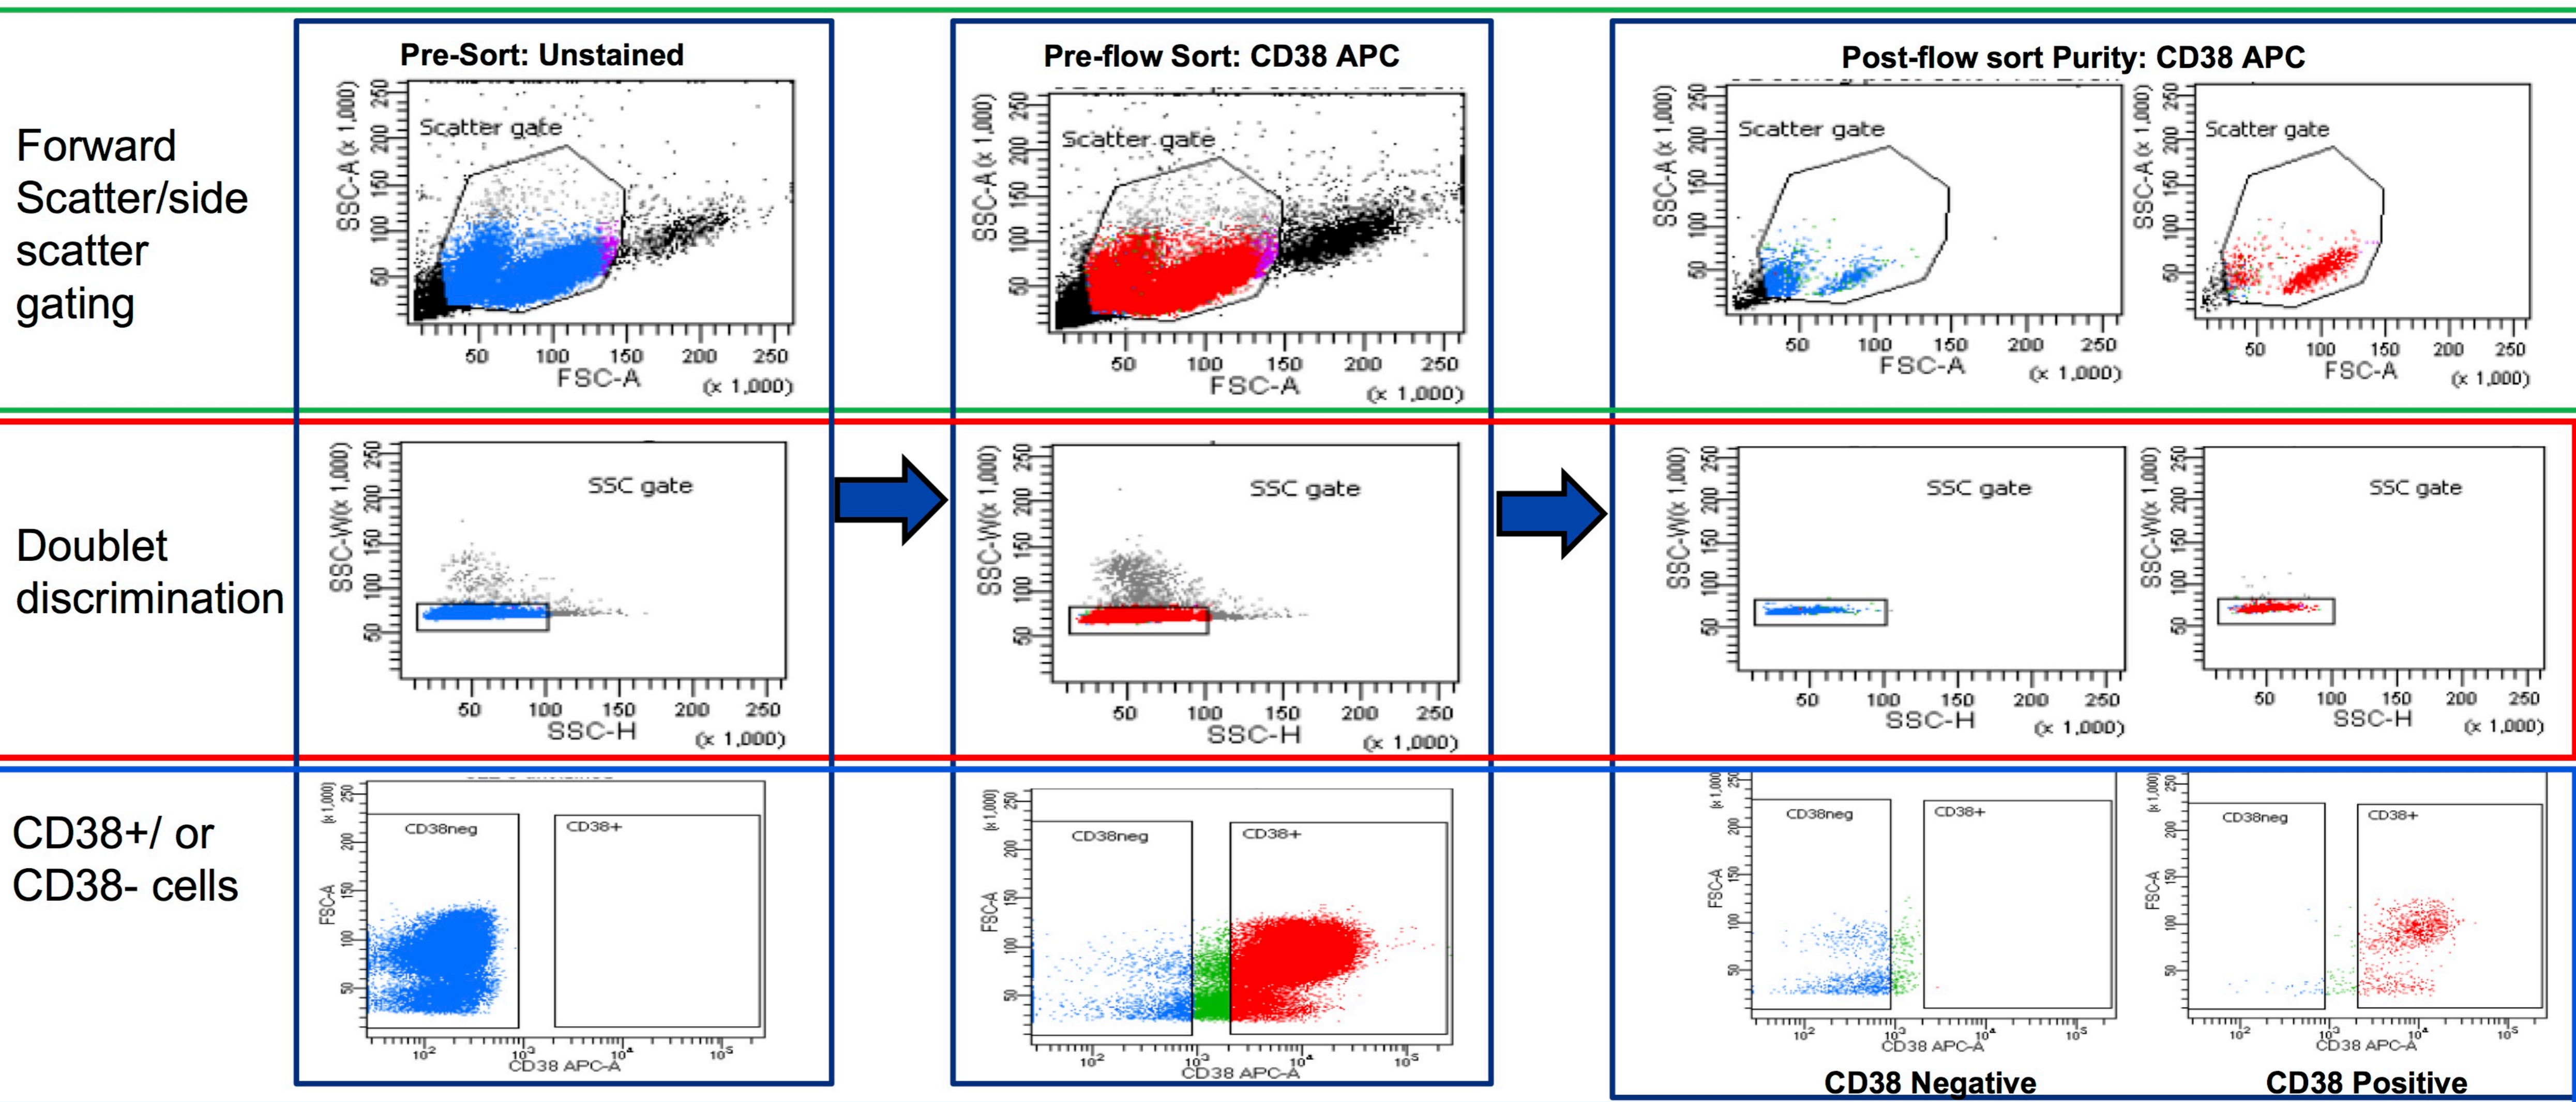

CD38 Negative

CD38 Positive

Supplemental Figure 2

**A. Workflow for Panels B– E**

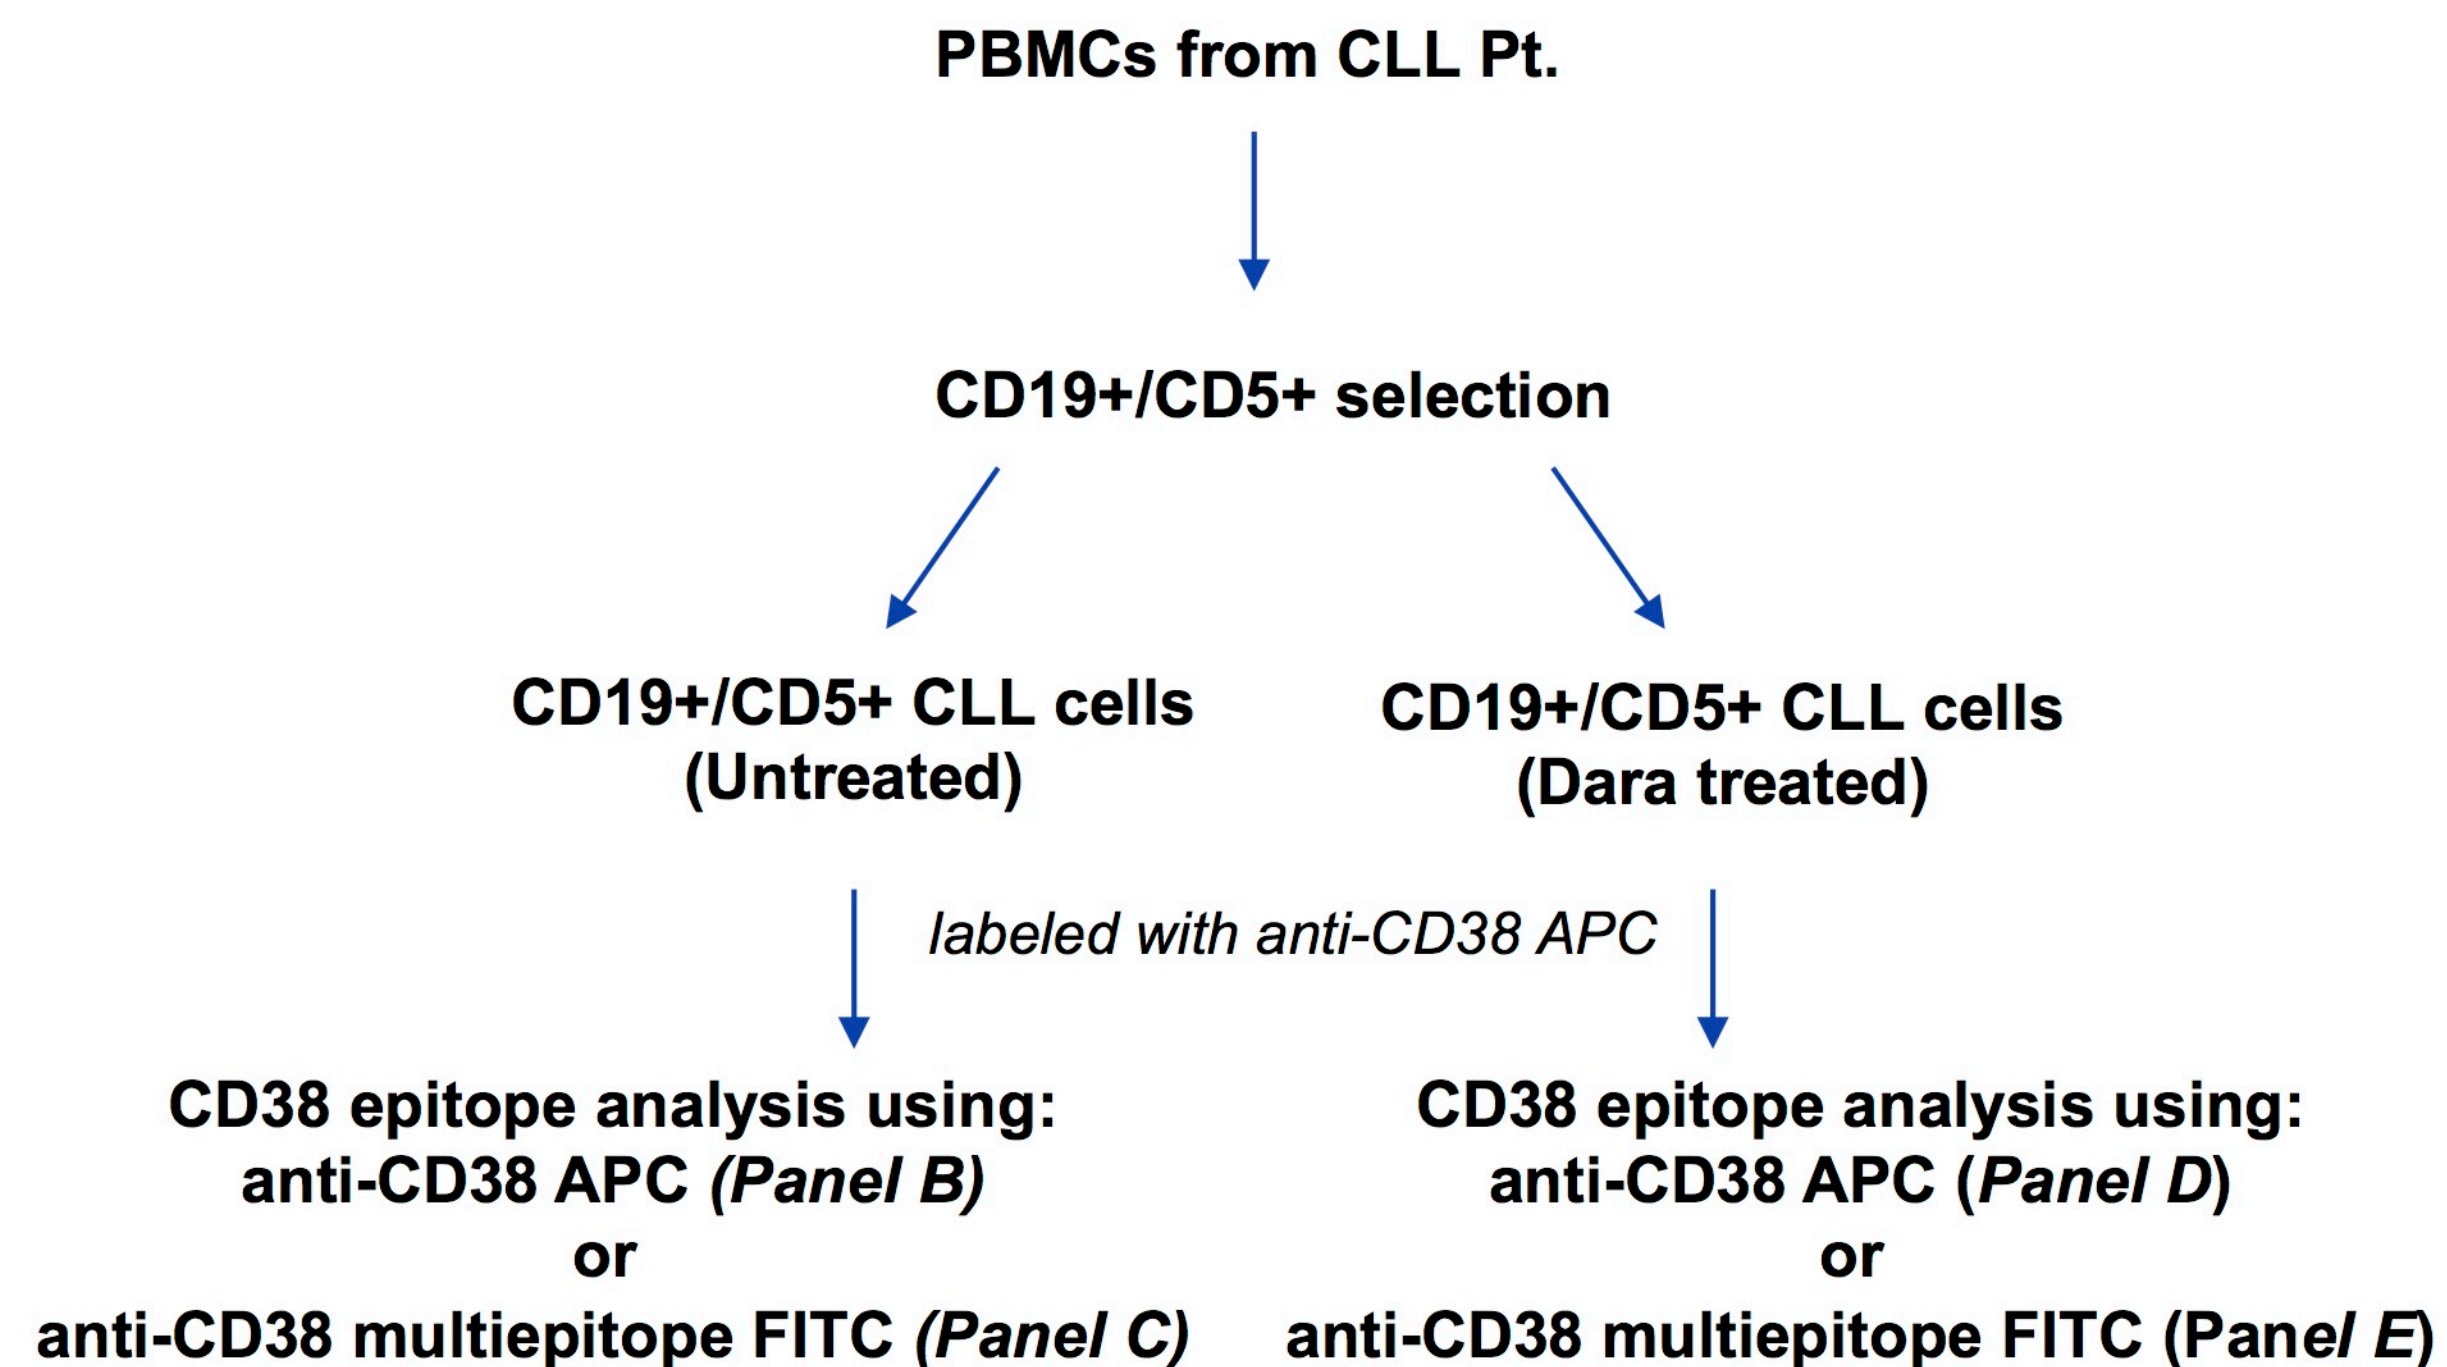

**A. Workflow for Panels F– G**

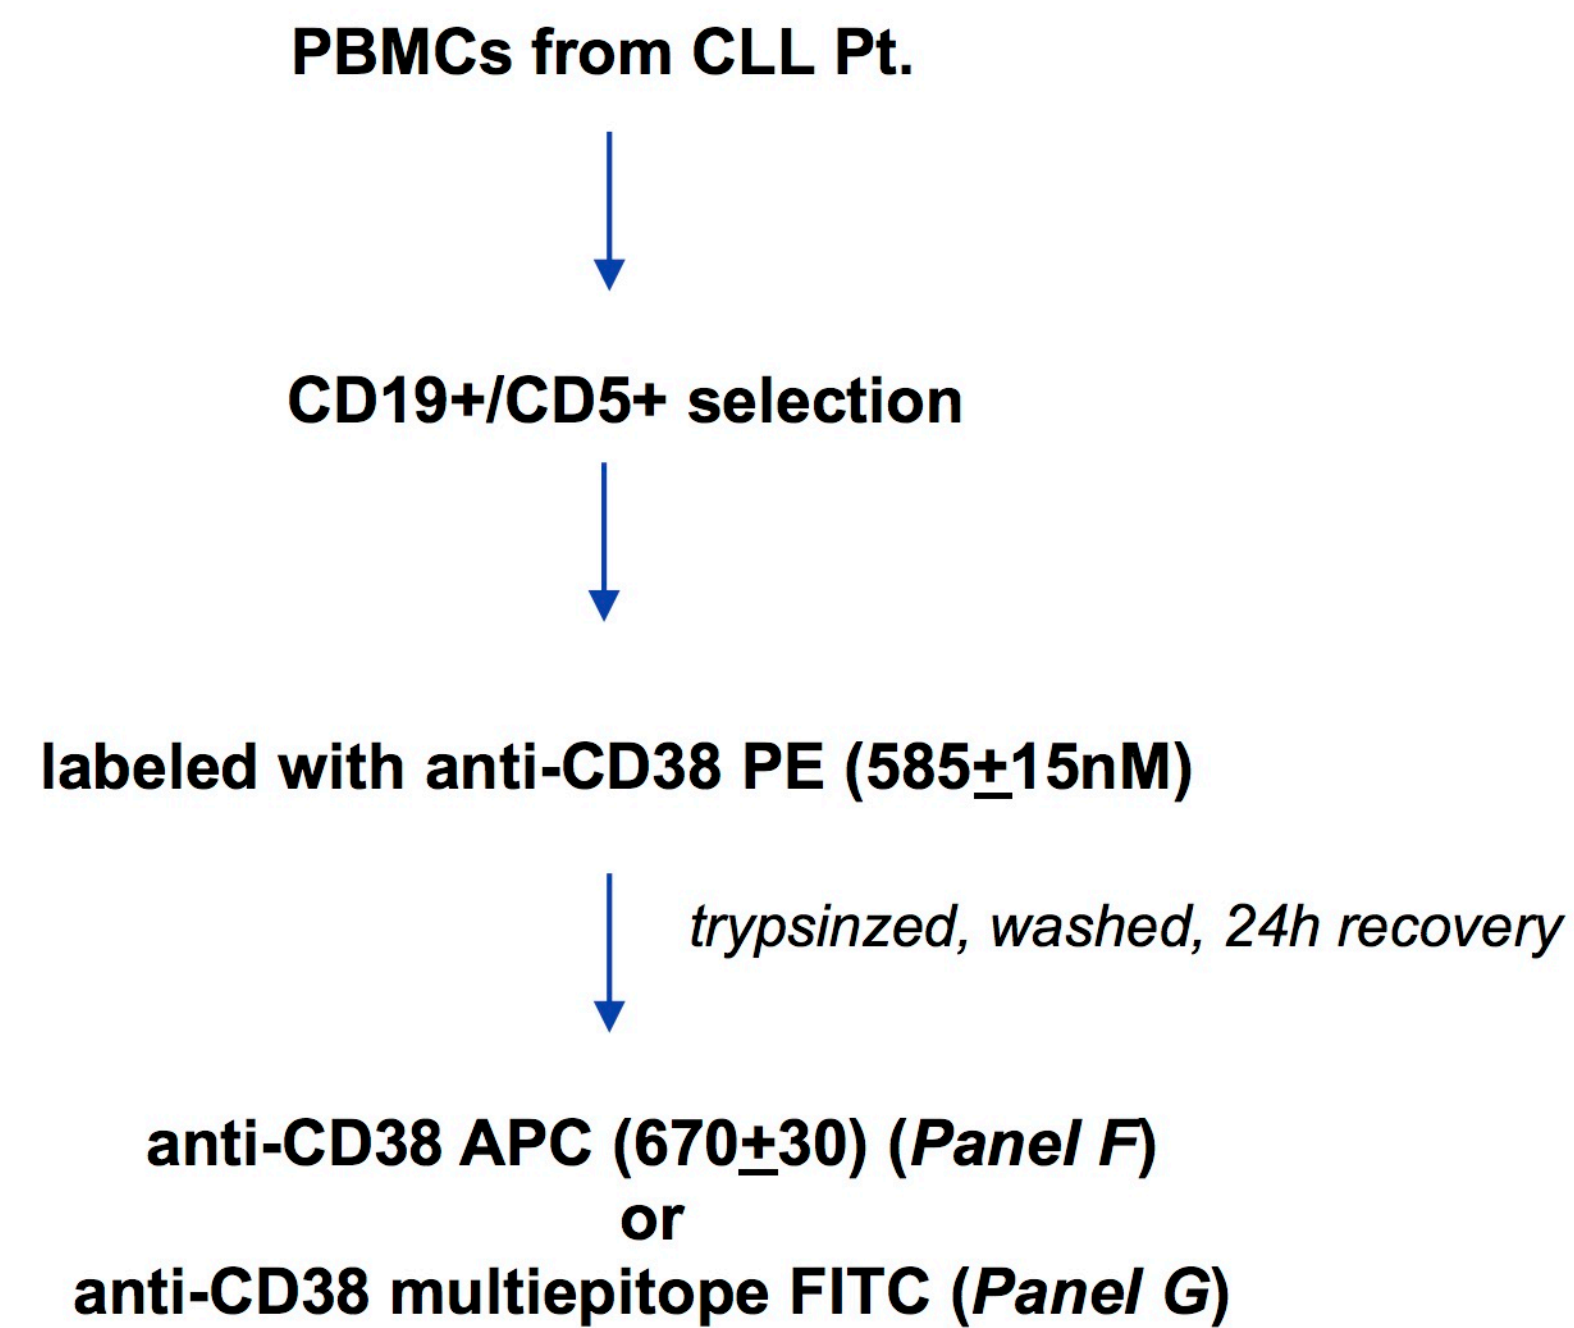

**B. CD38+ CLL cells (Untreated)**

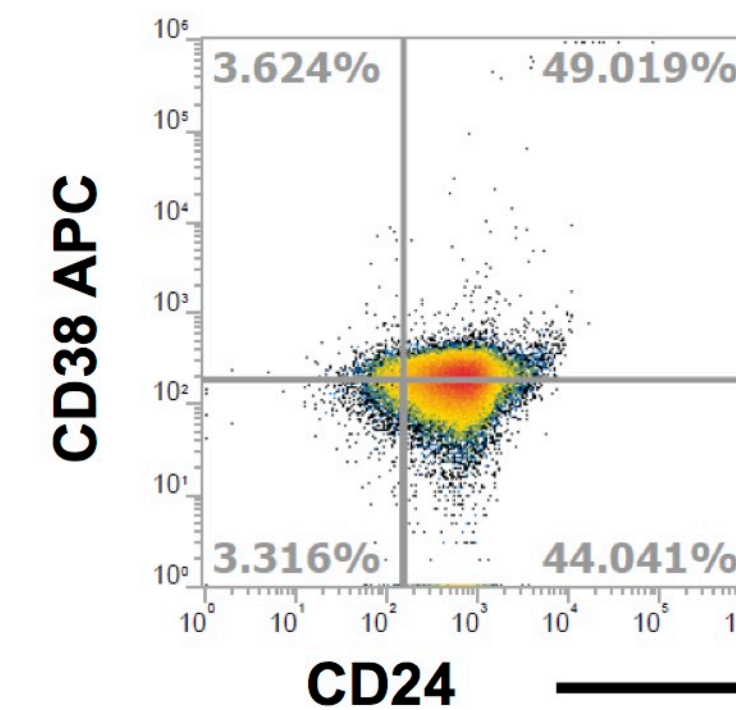

**D. CD38+ CLL cells (Dara treatment 2hr)**

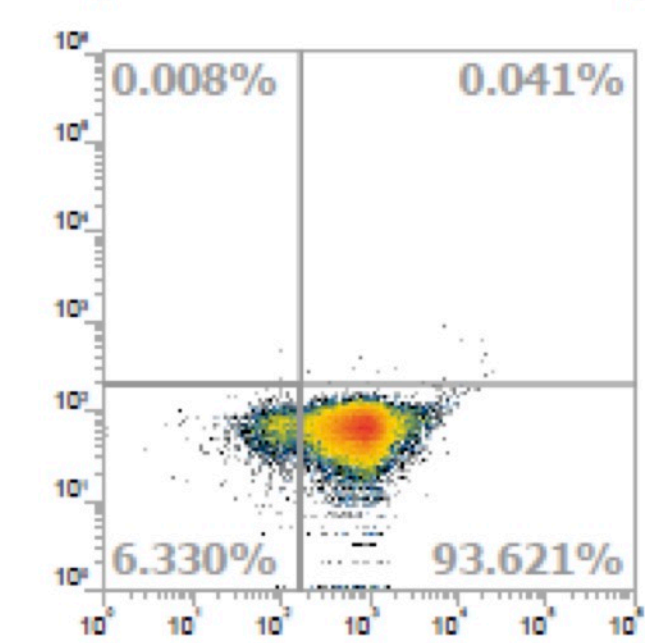

**F. CD38+ CLL cells (Post-trypsinization)**

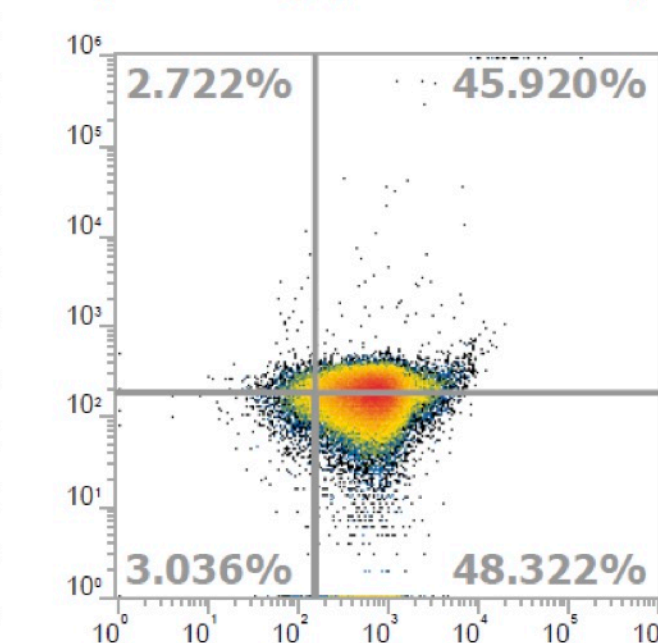

**C.**

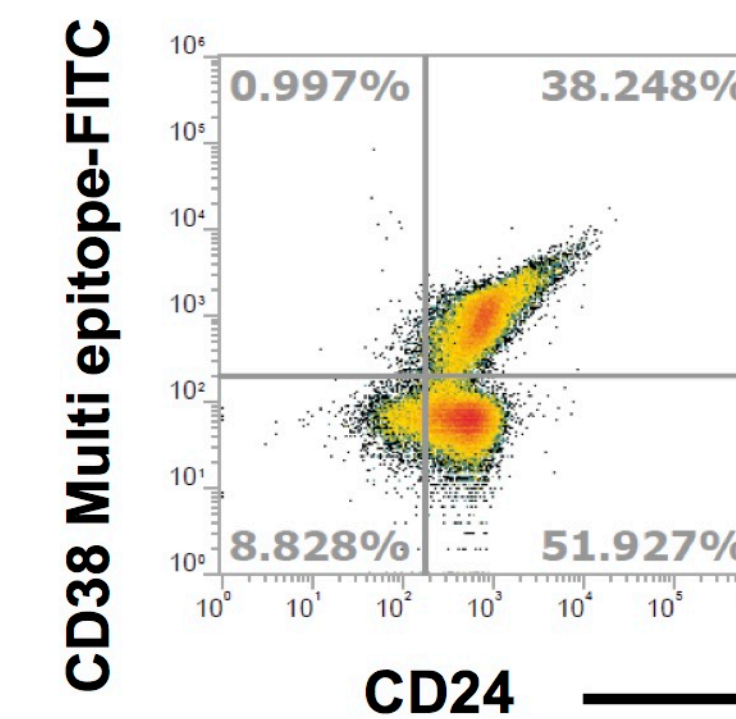

**E.**

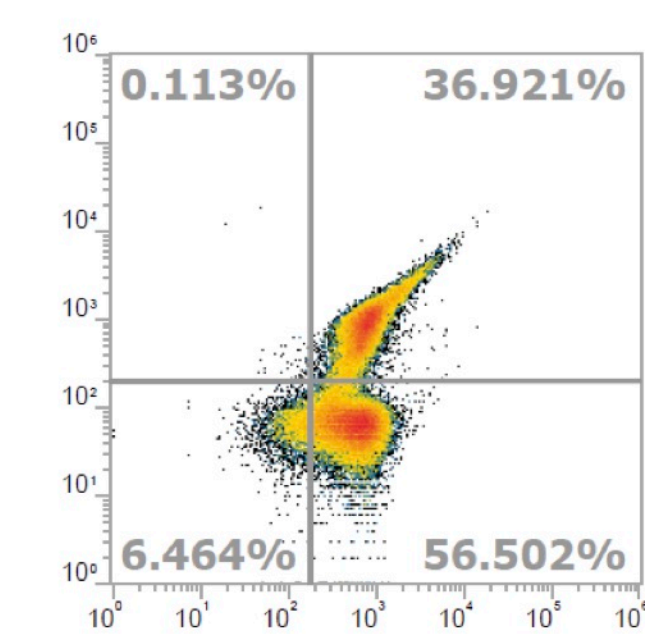

**G.**

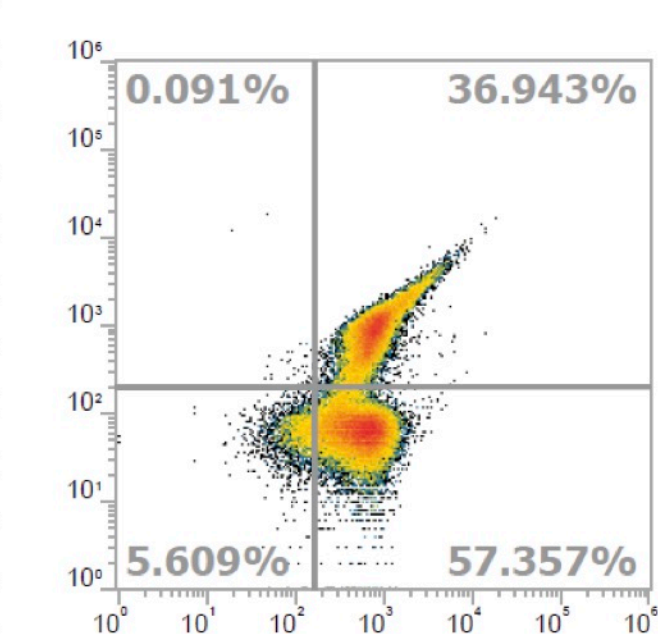

**Supplemental Figure 3**

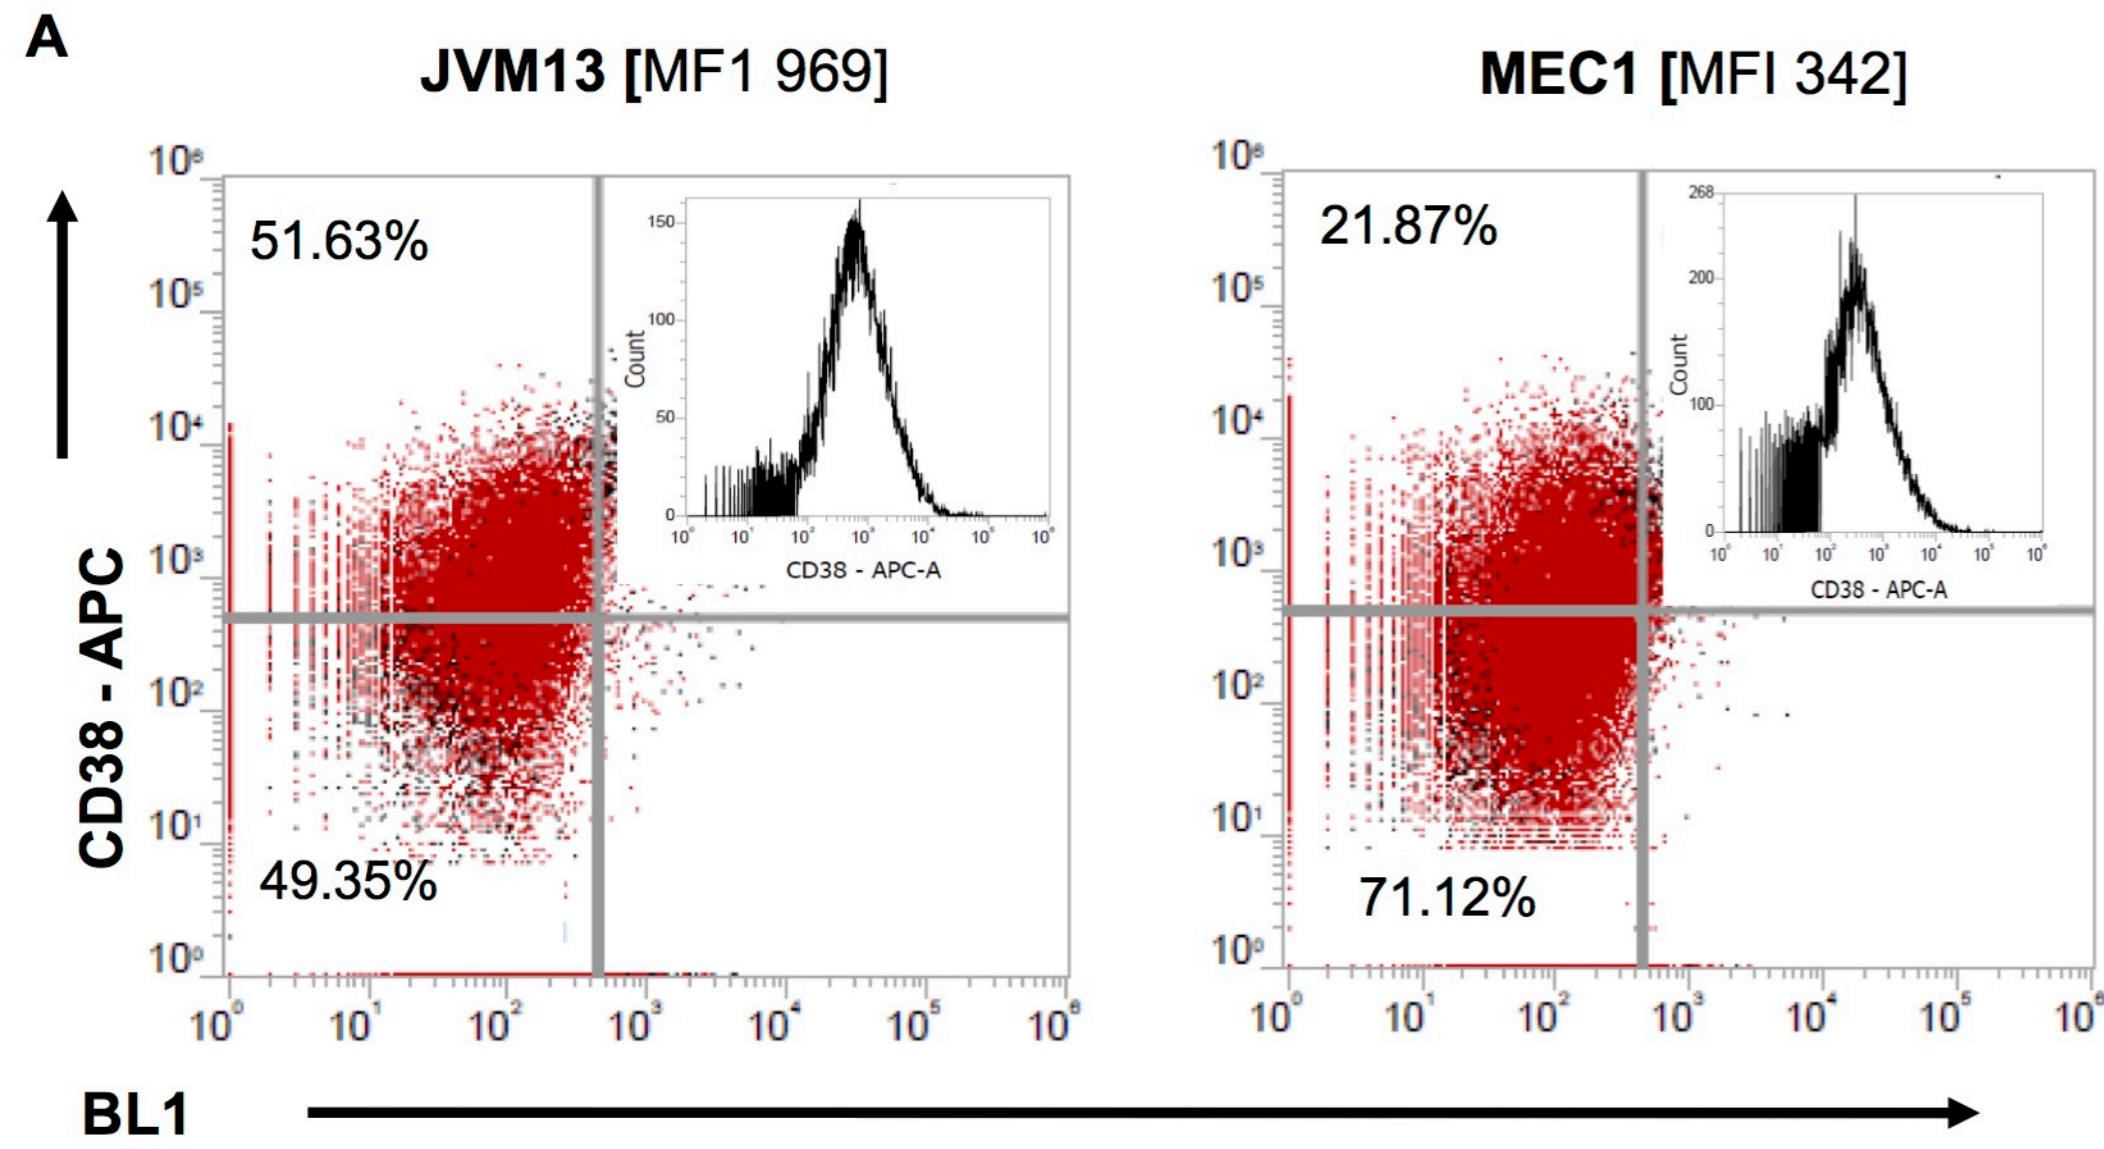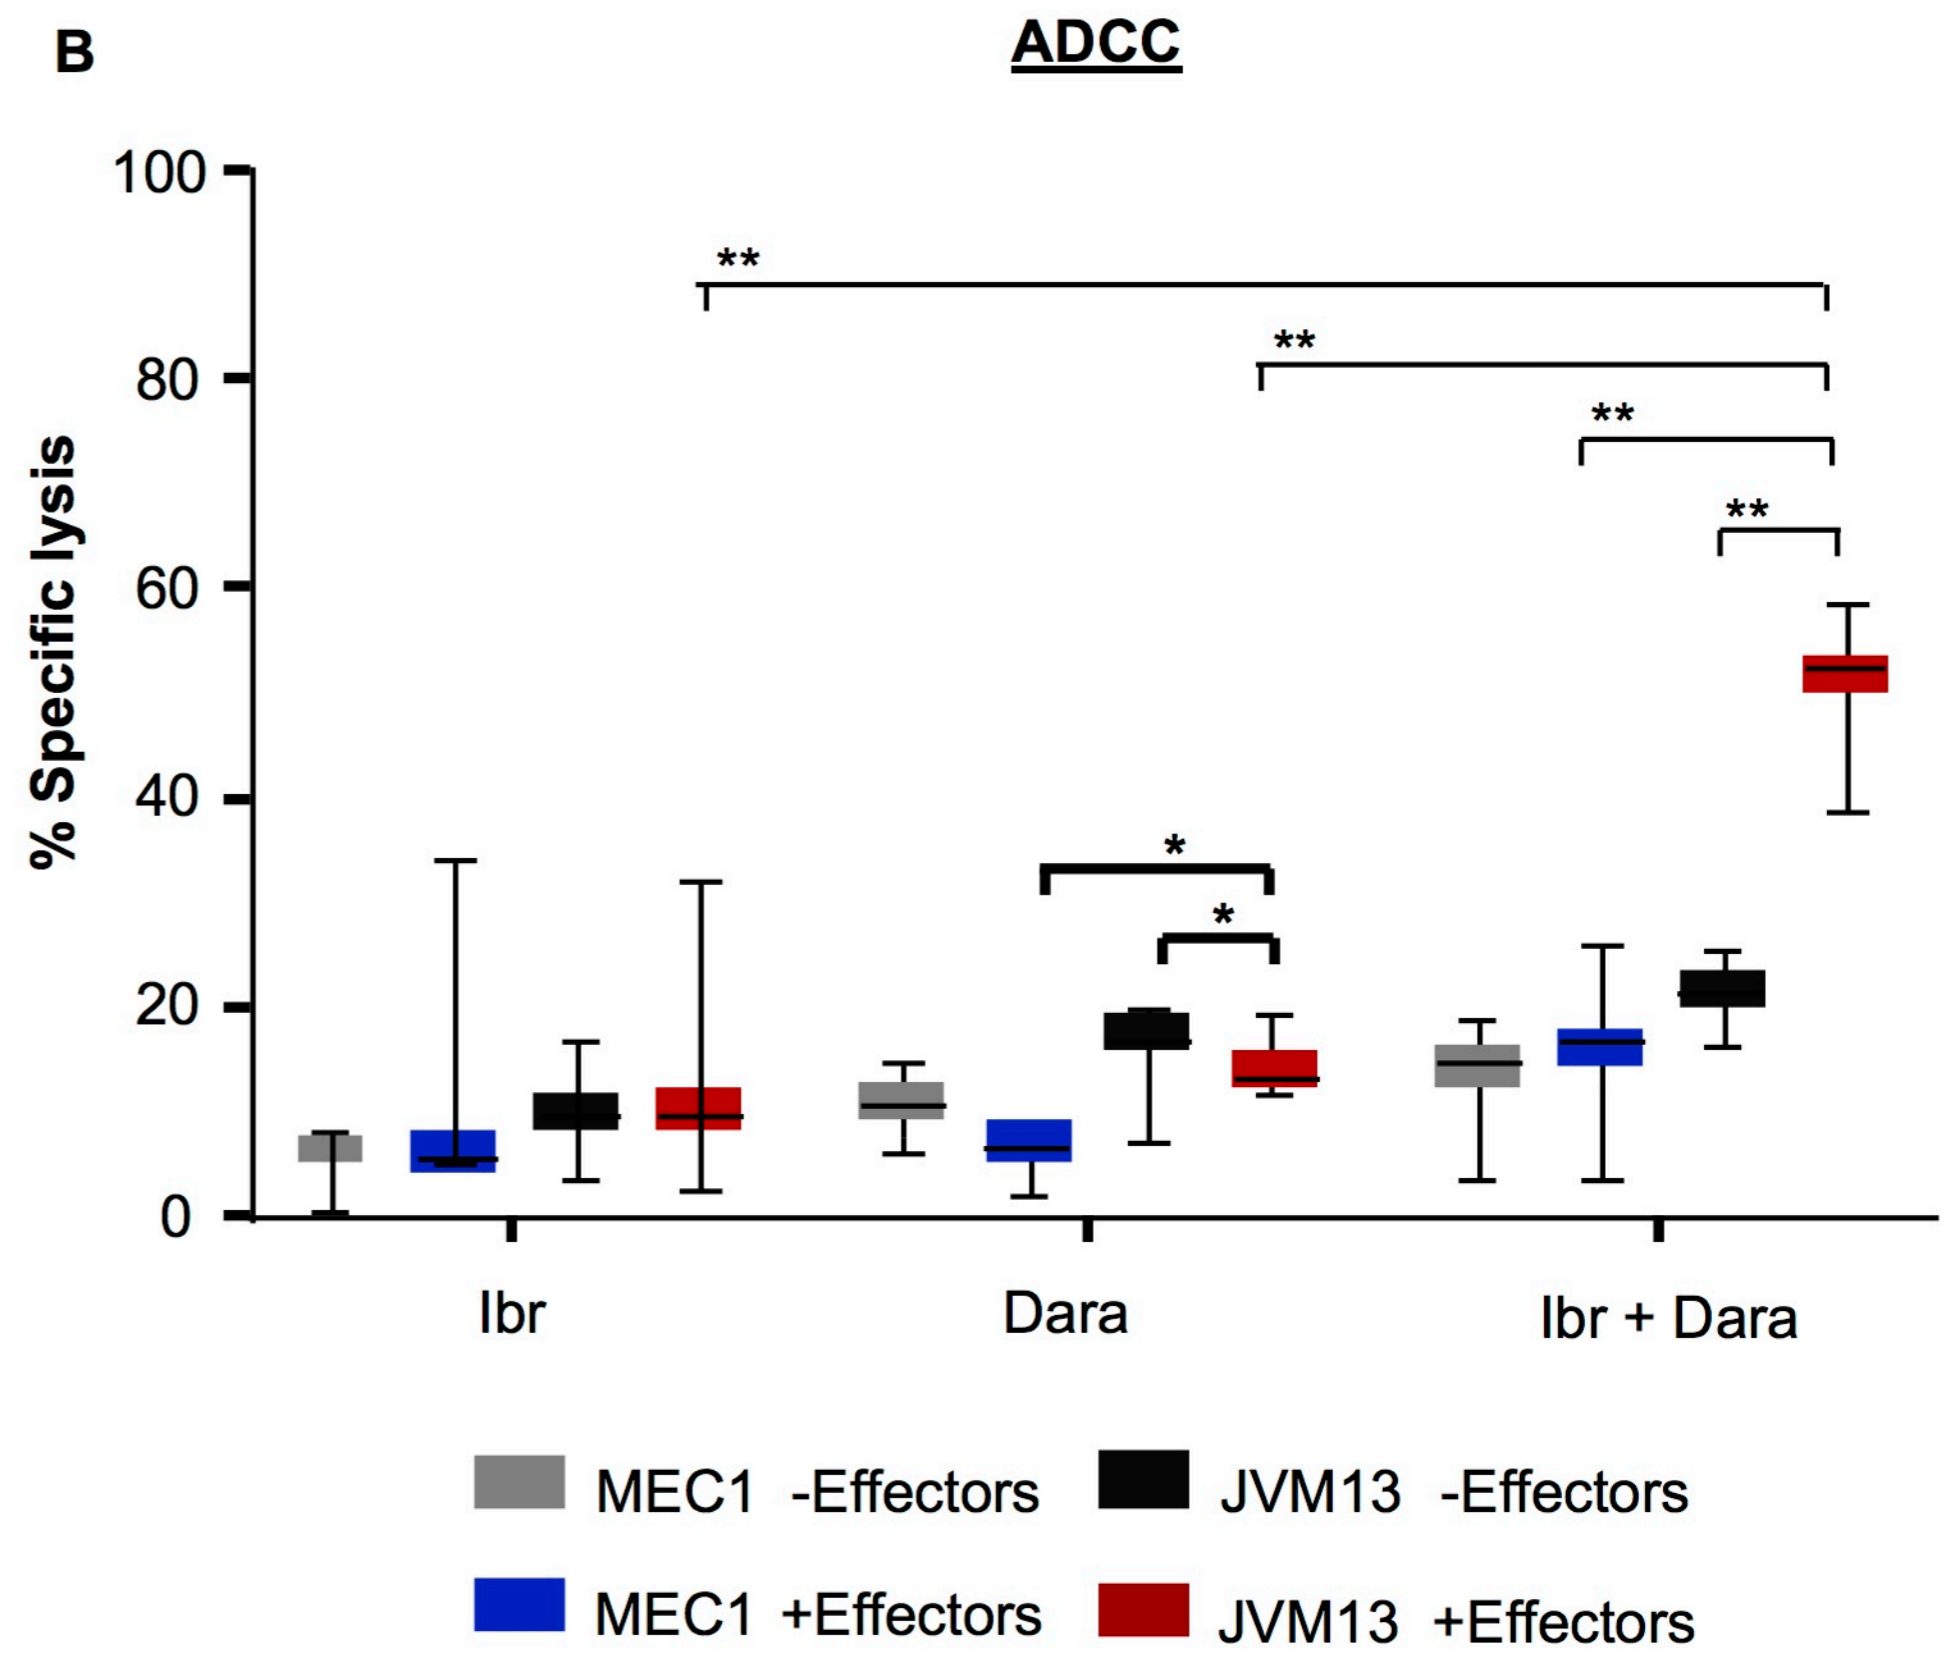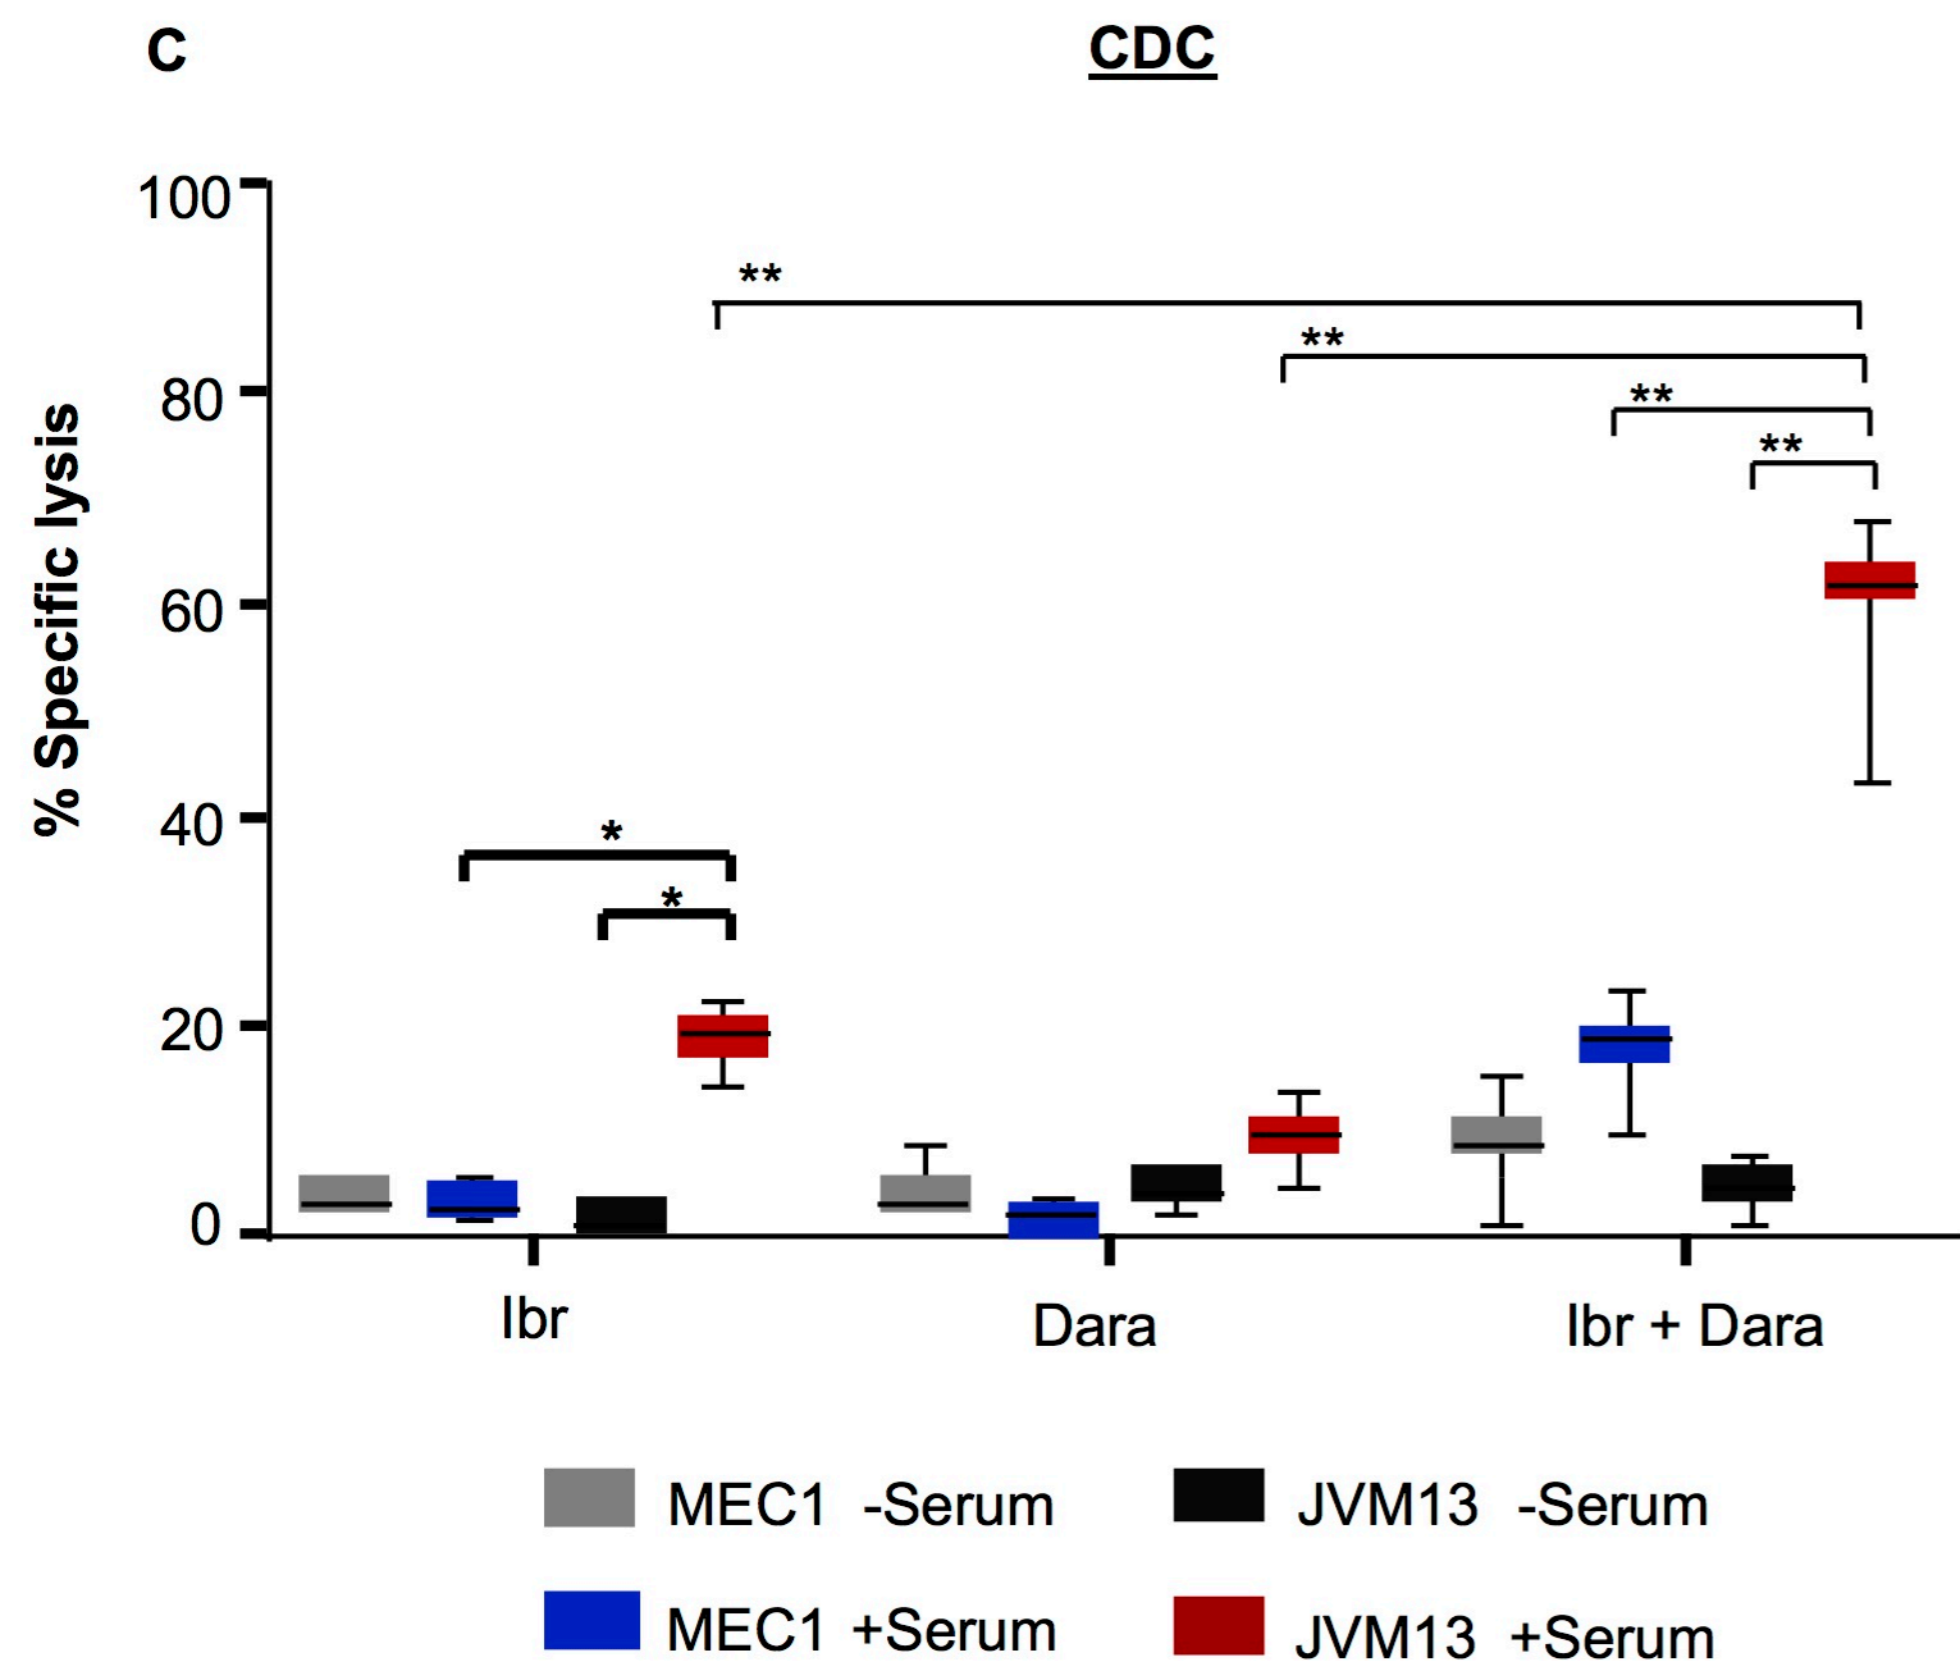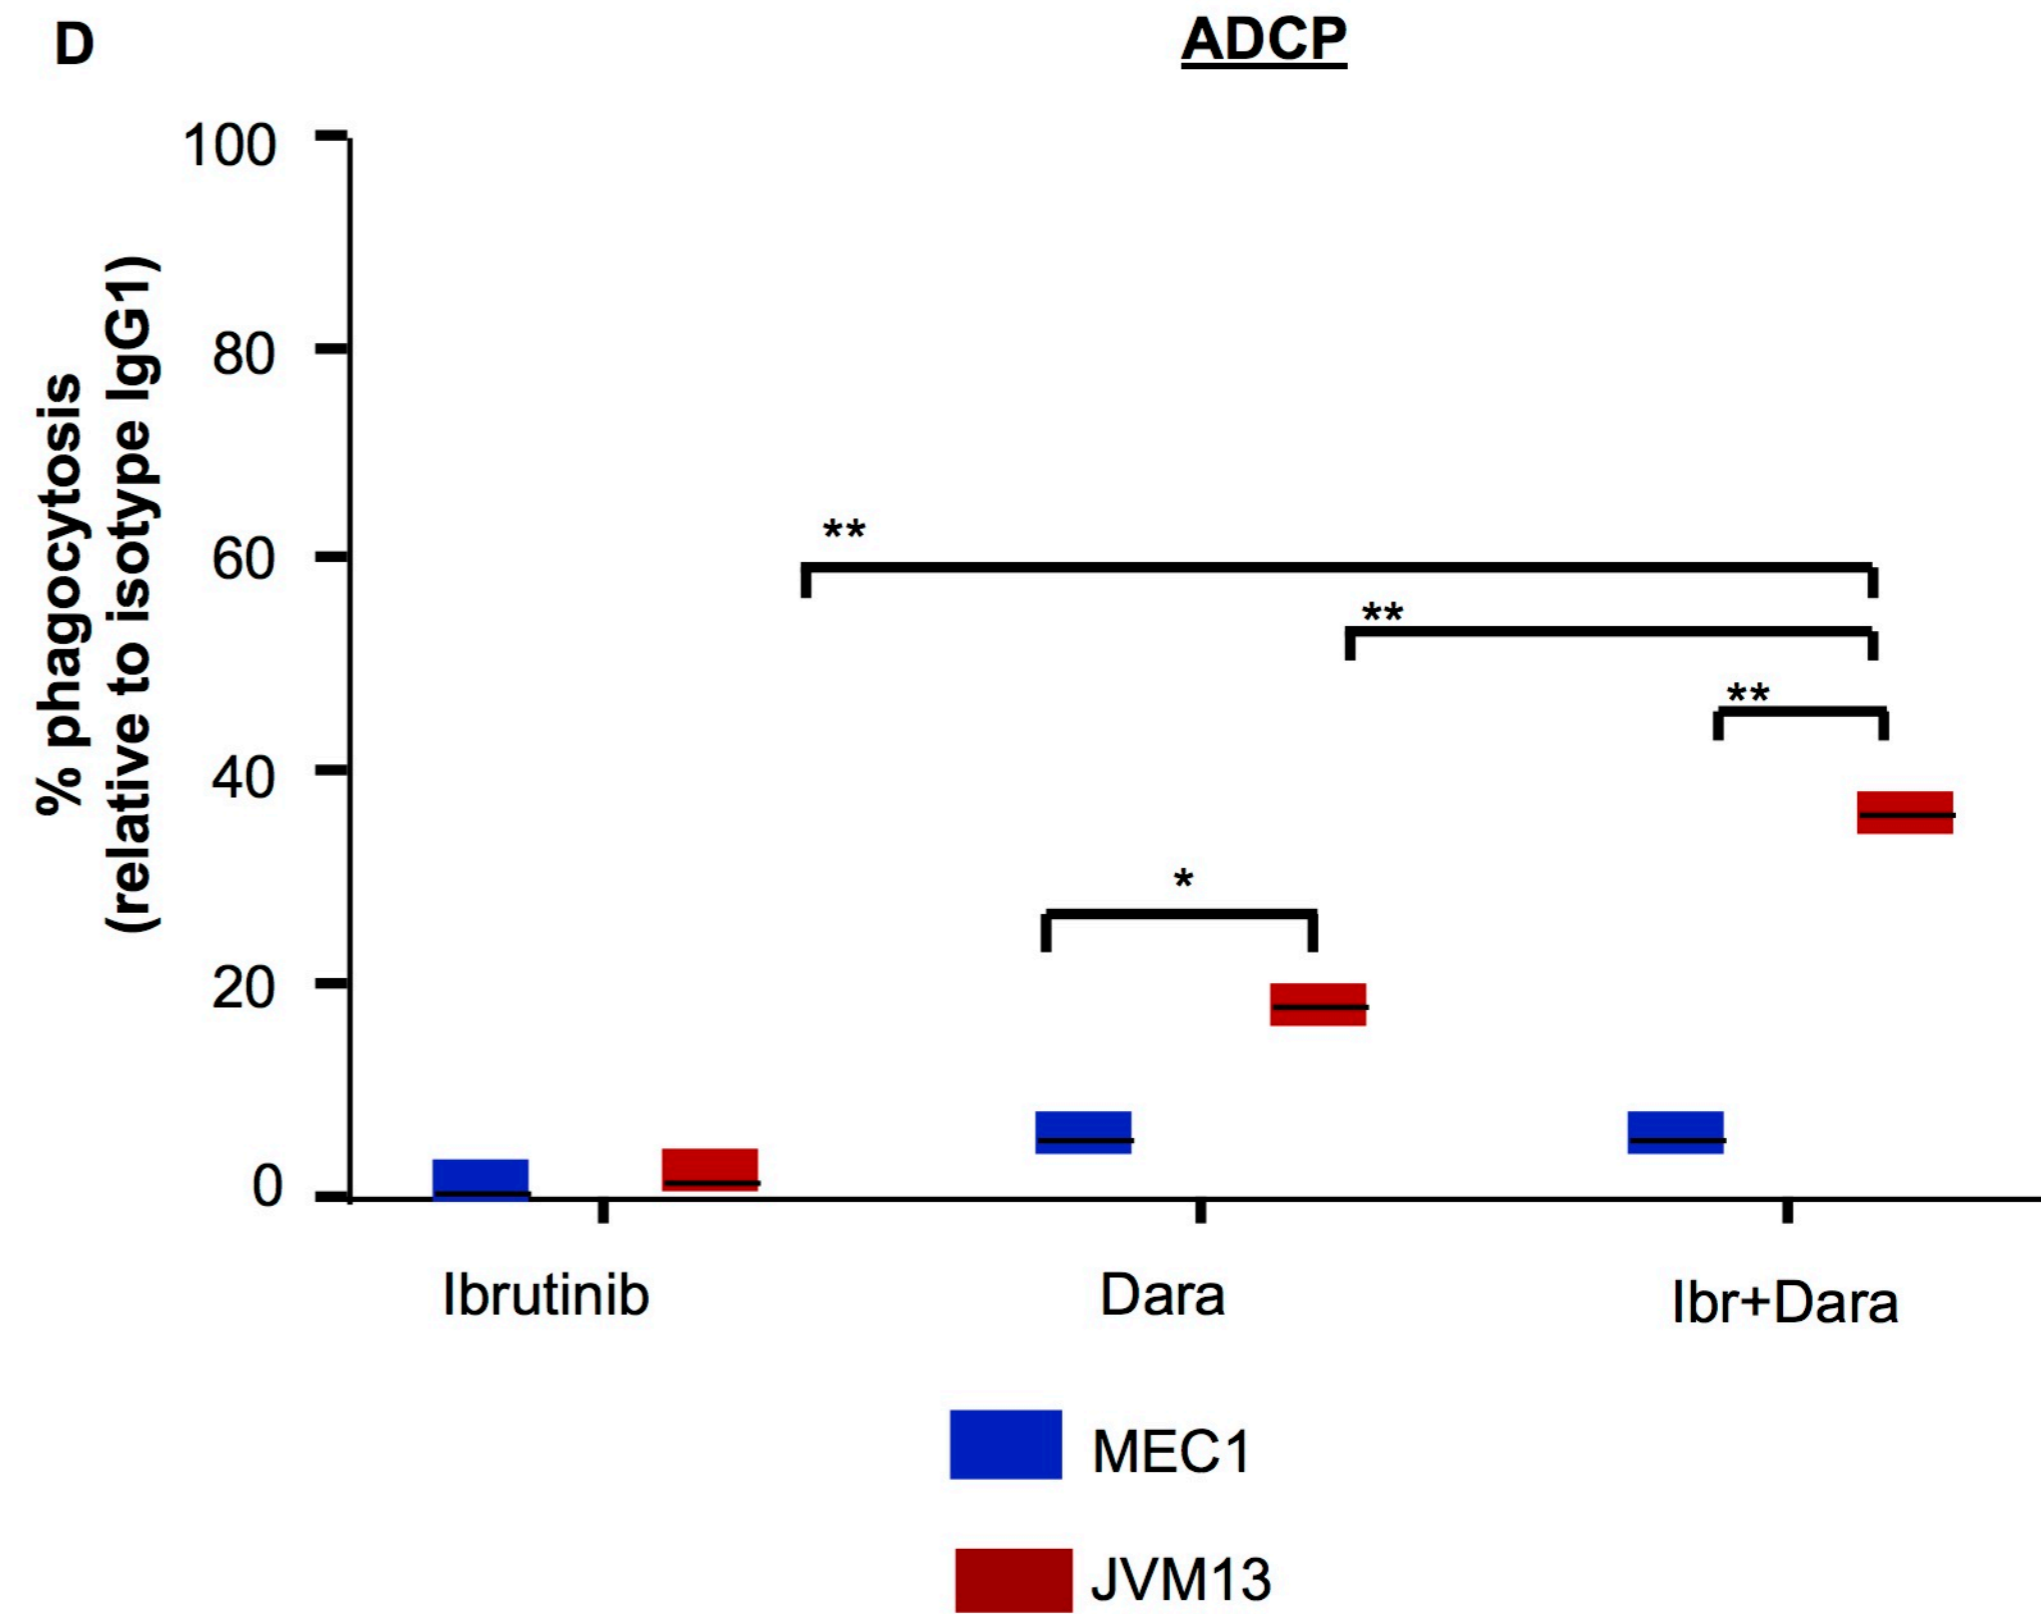

# Supplemental Figure 4

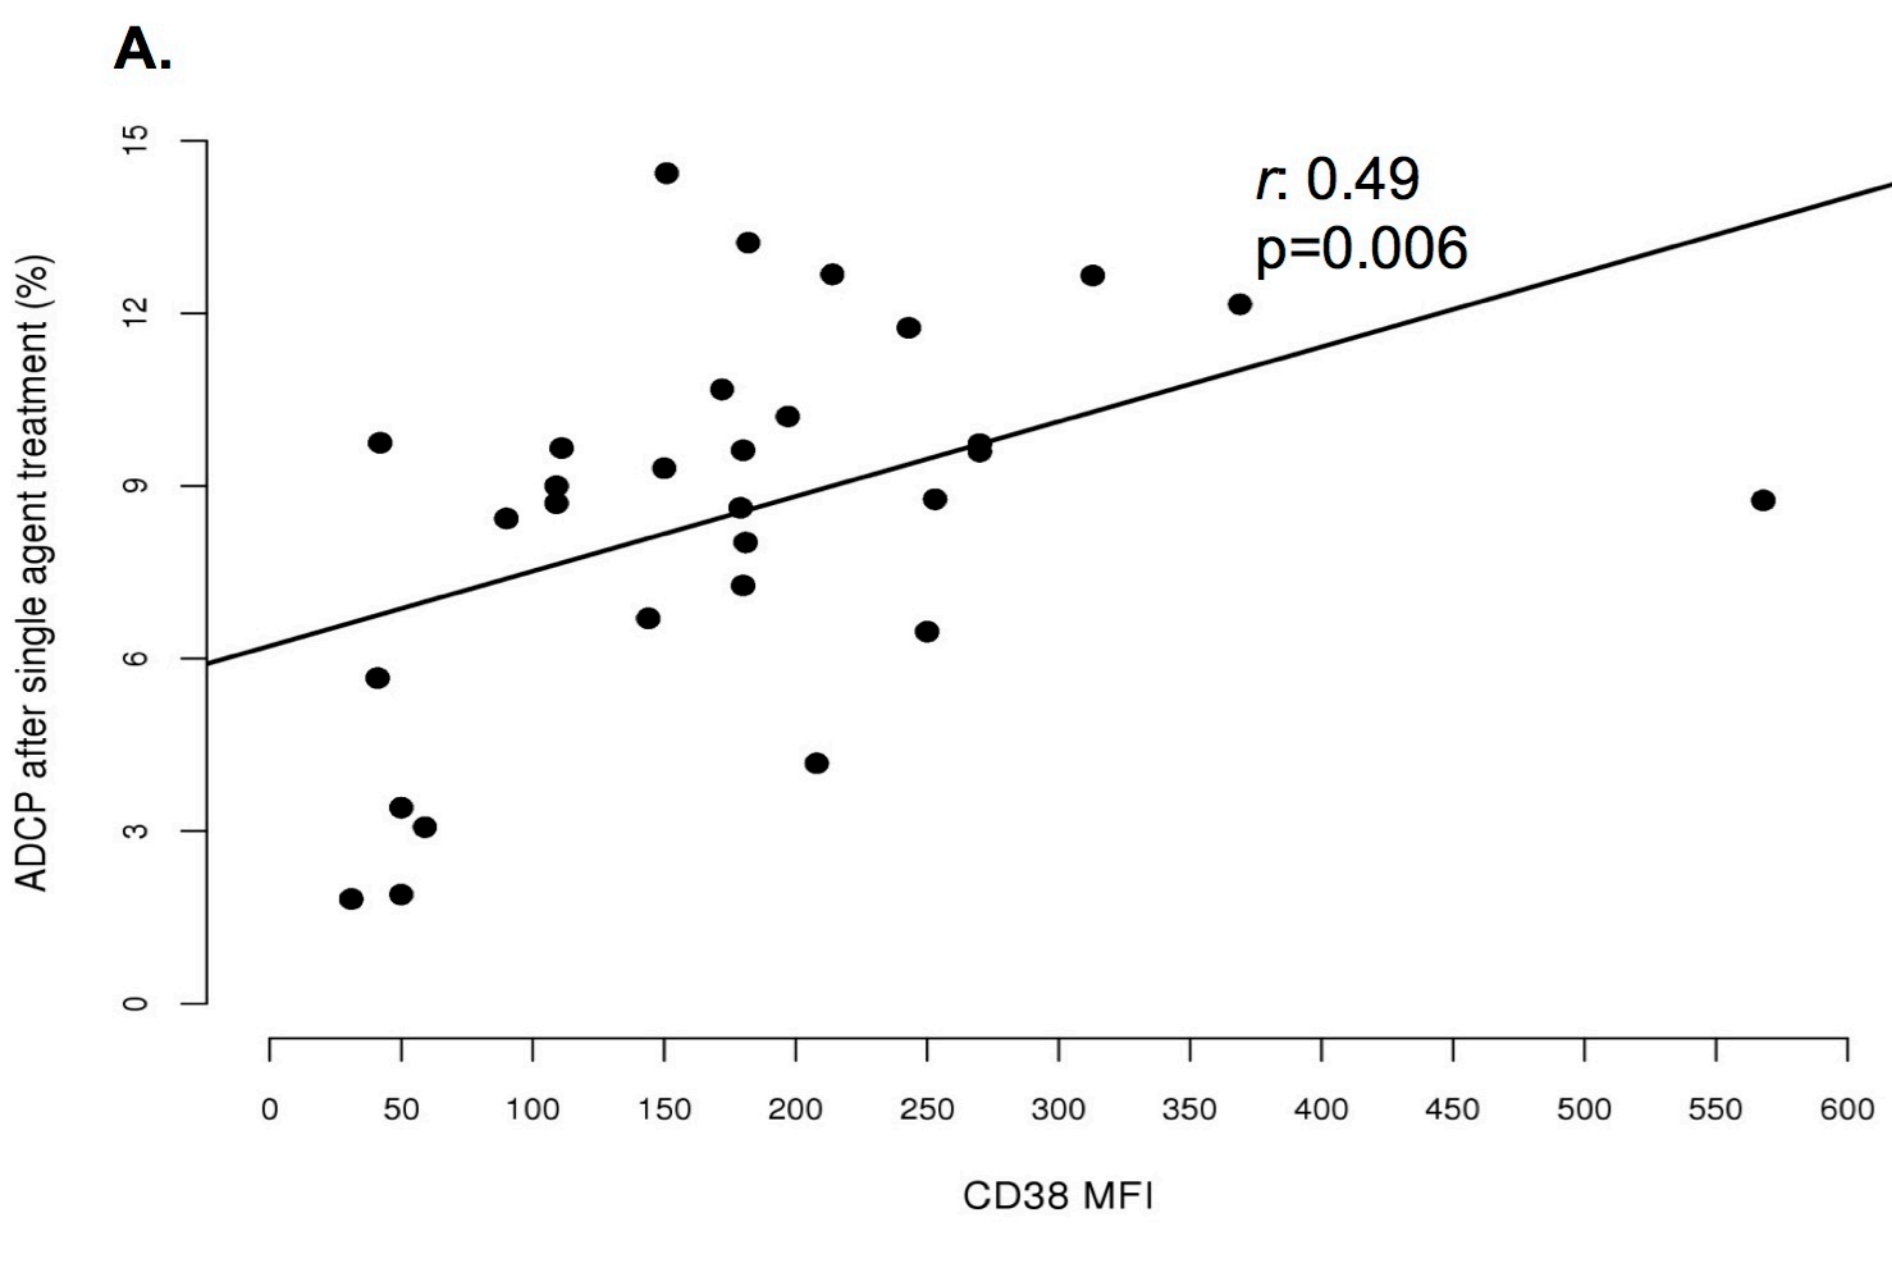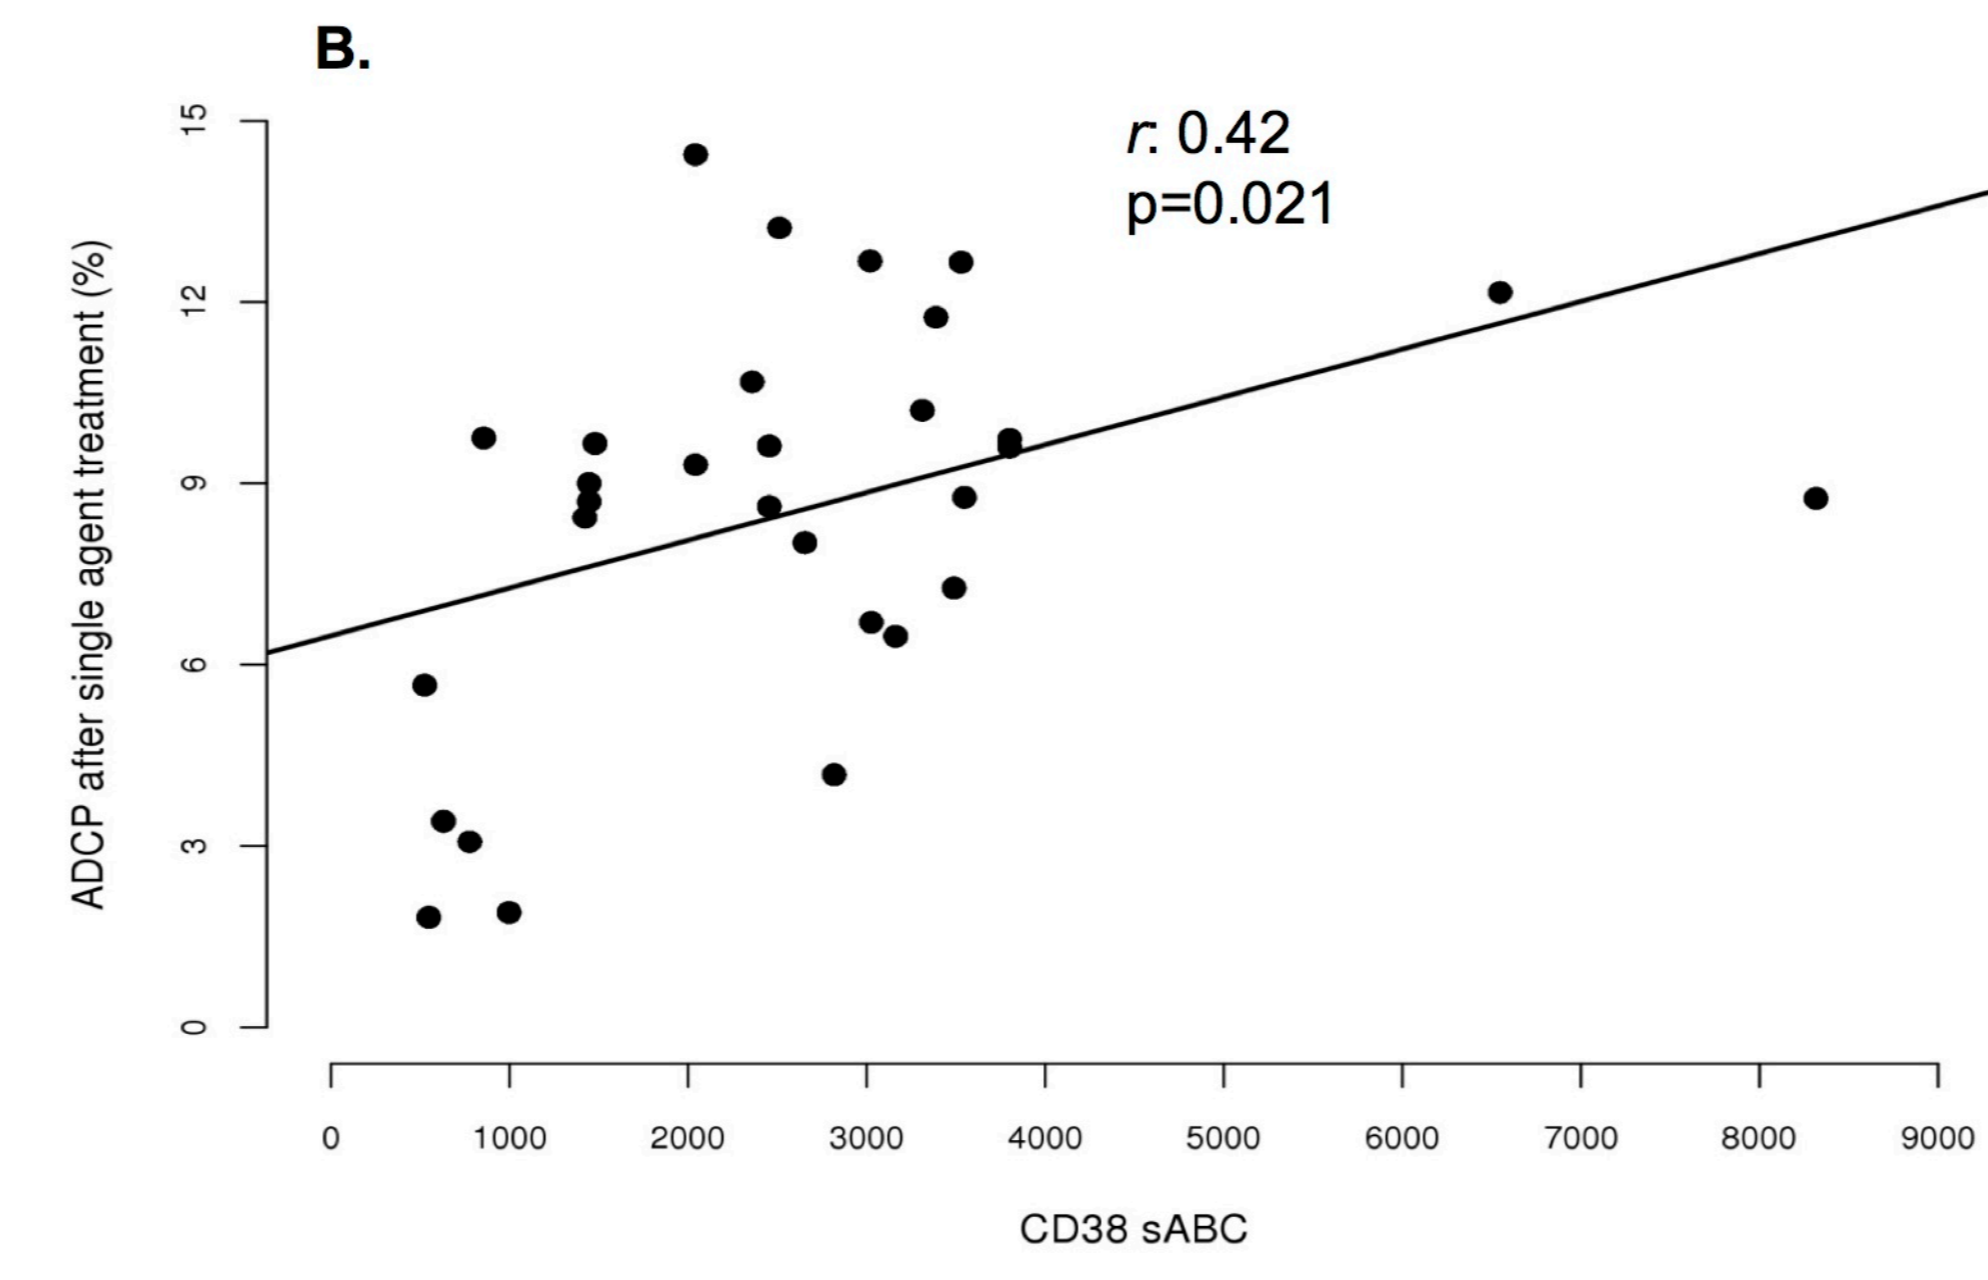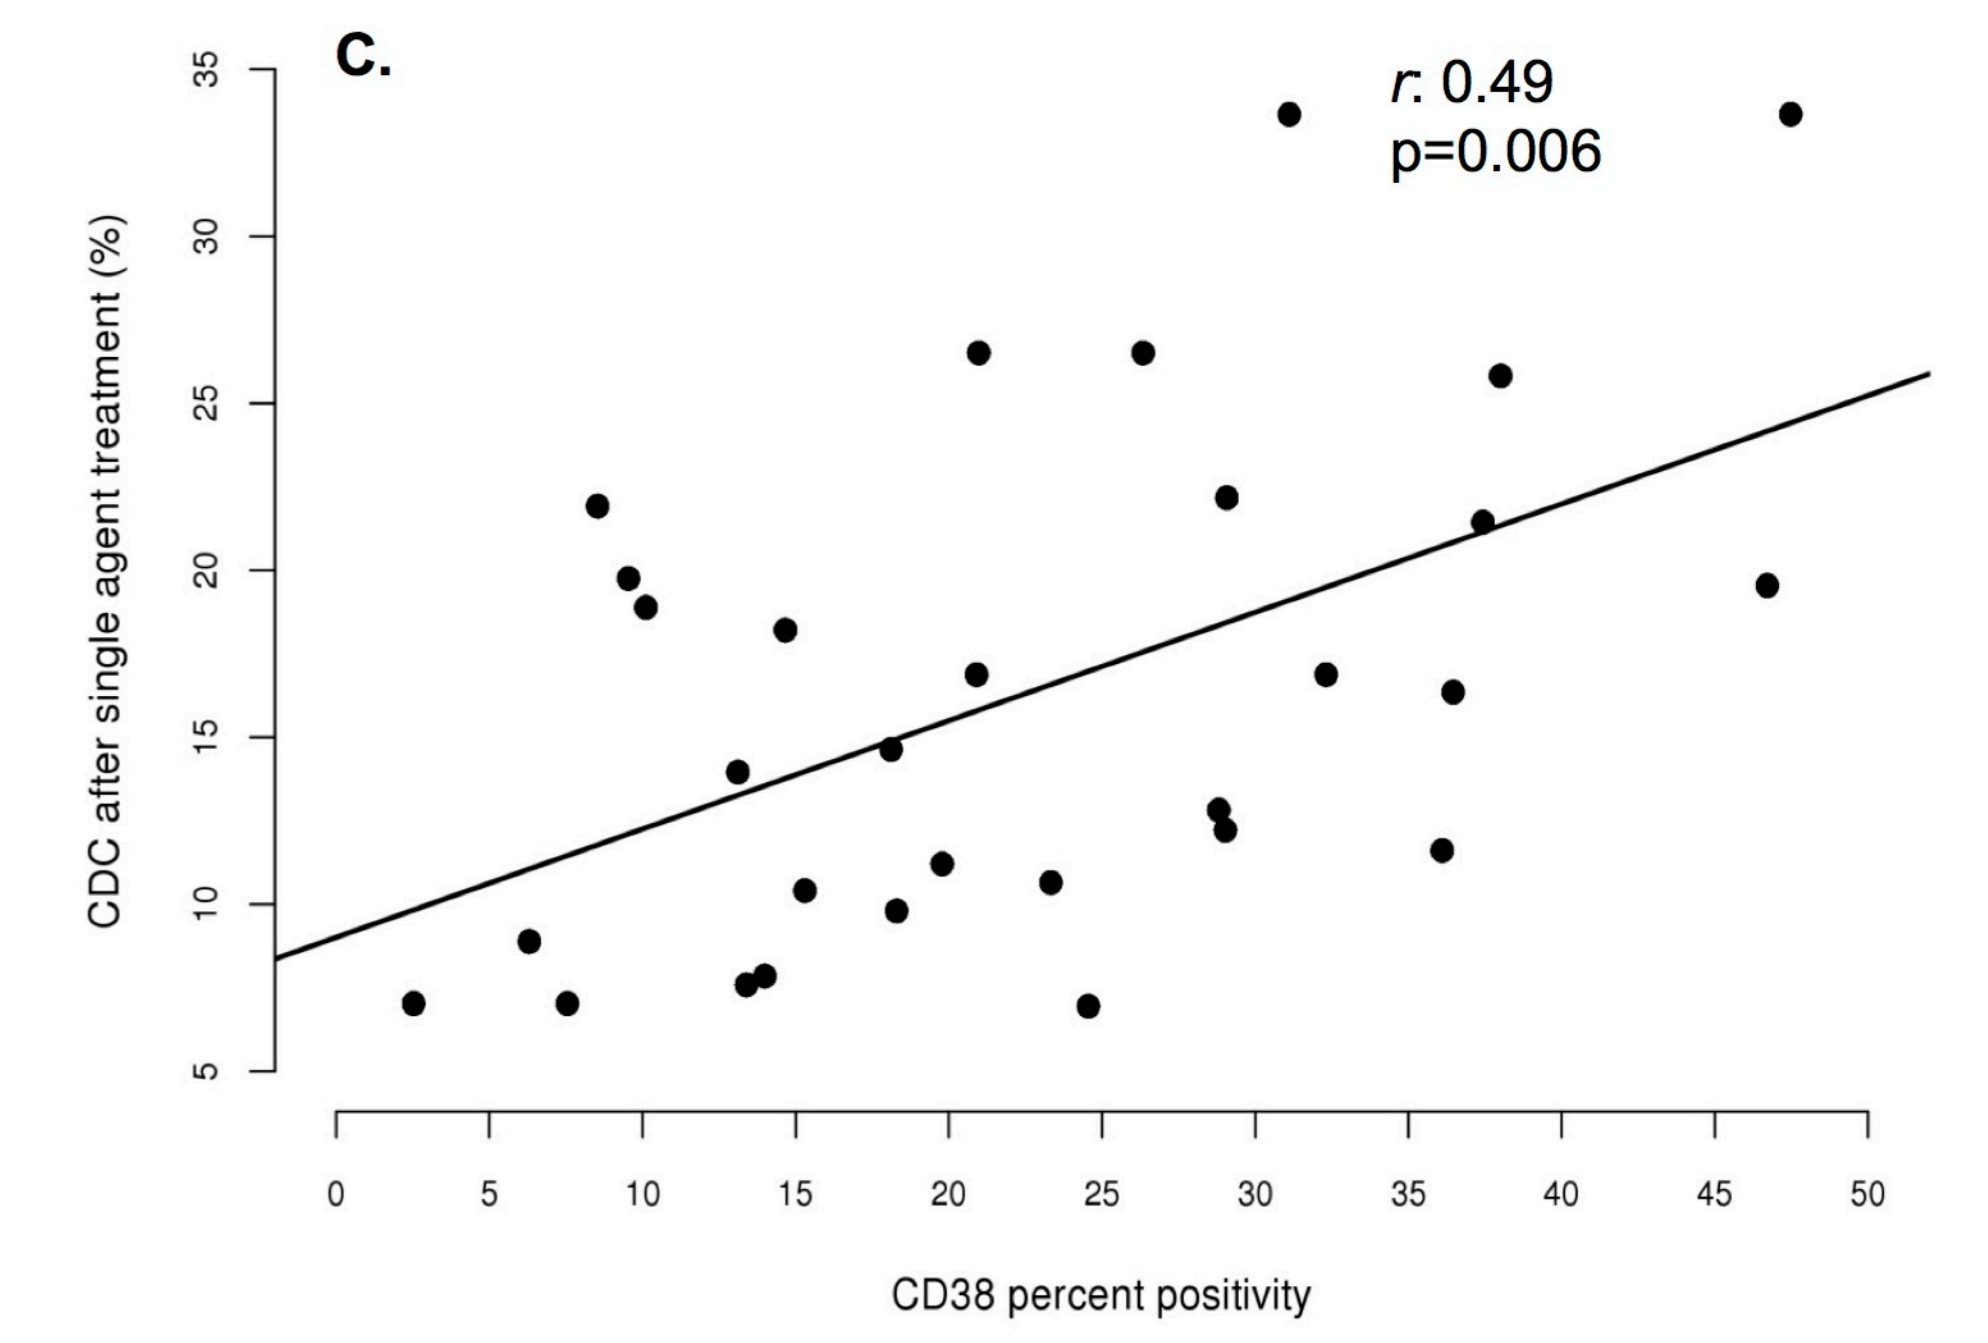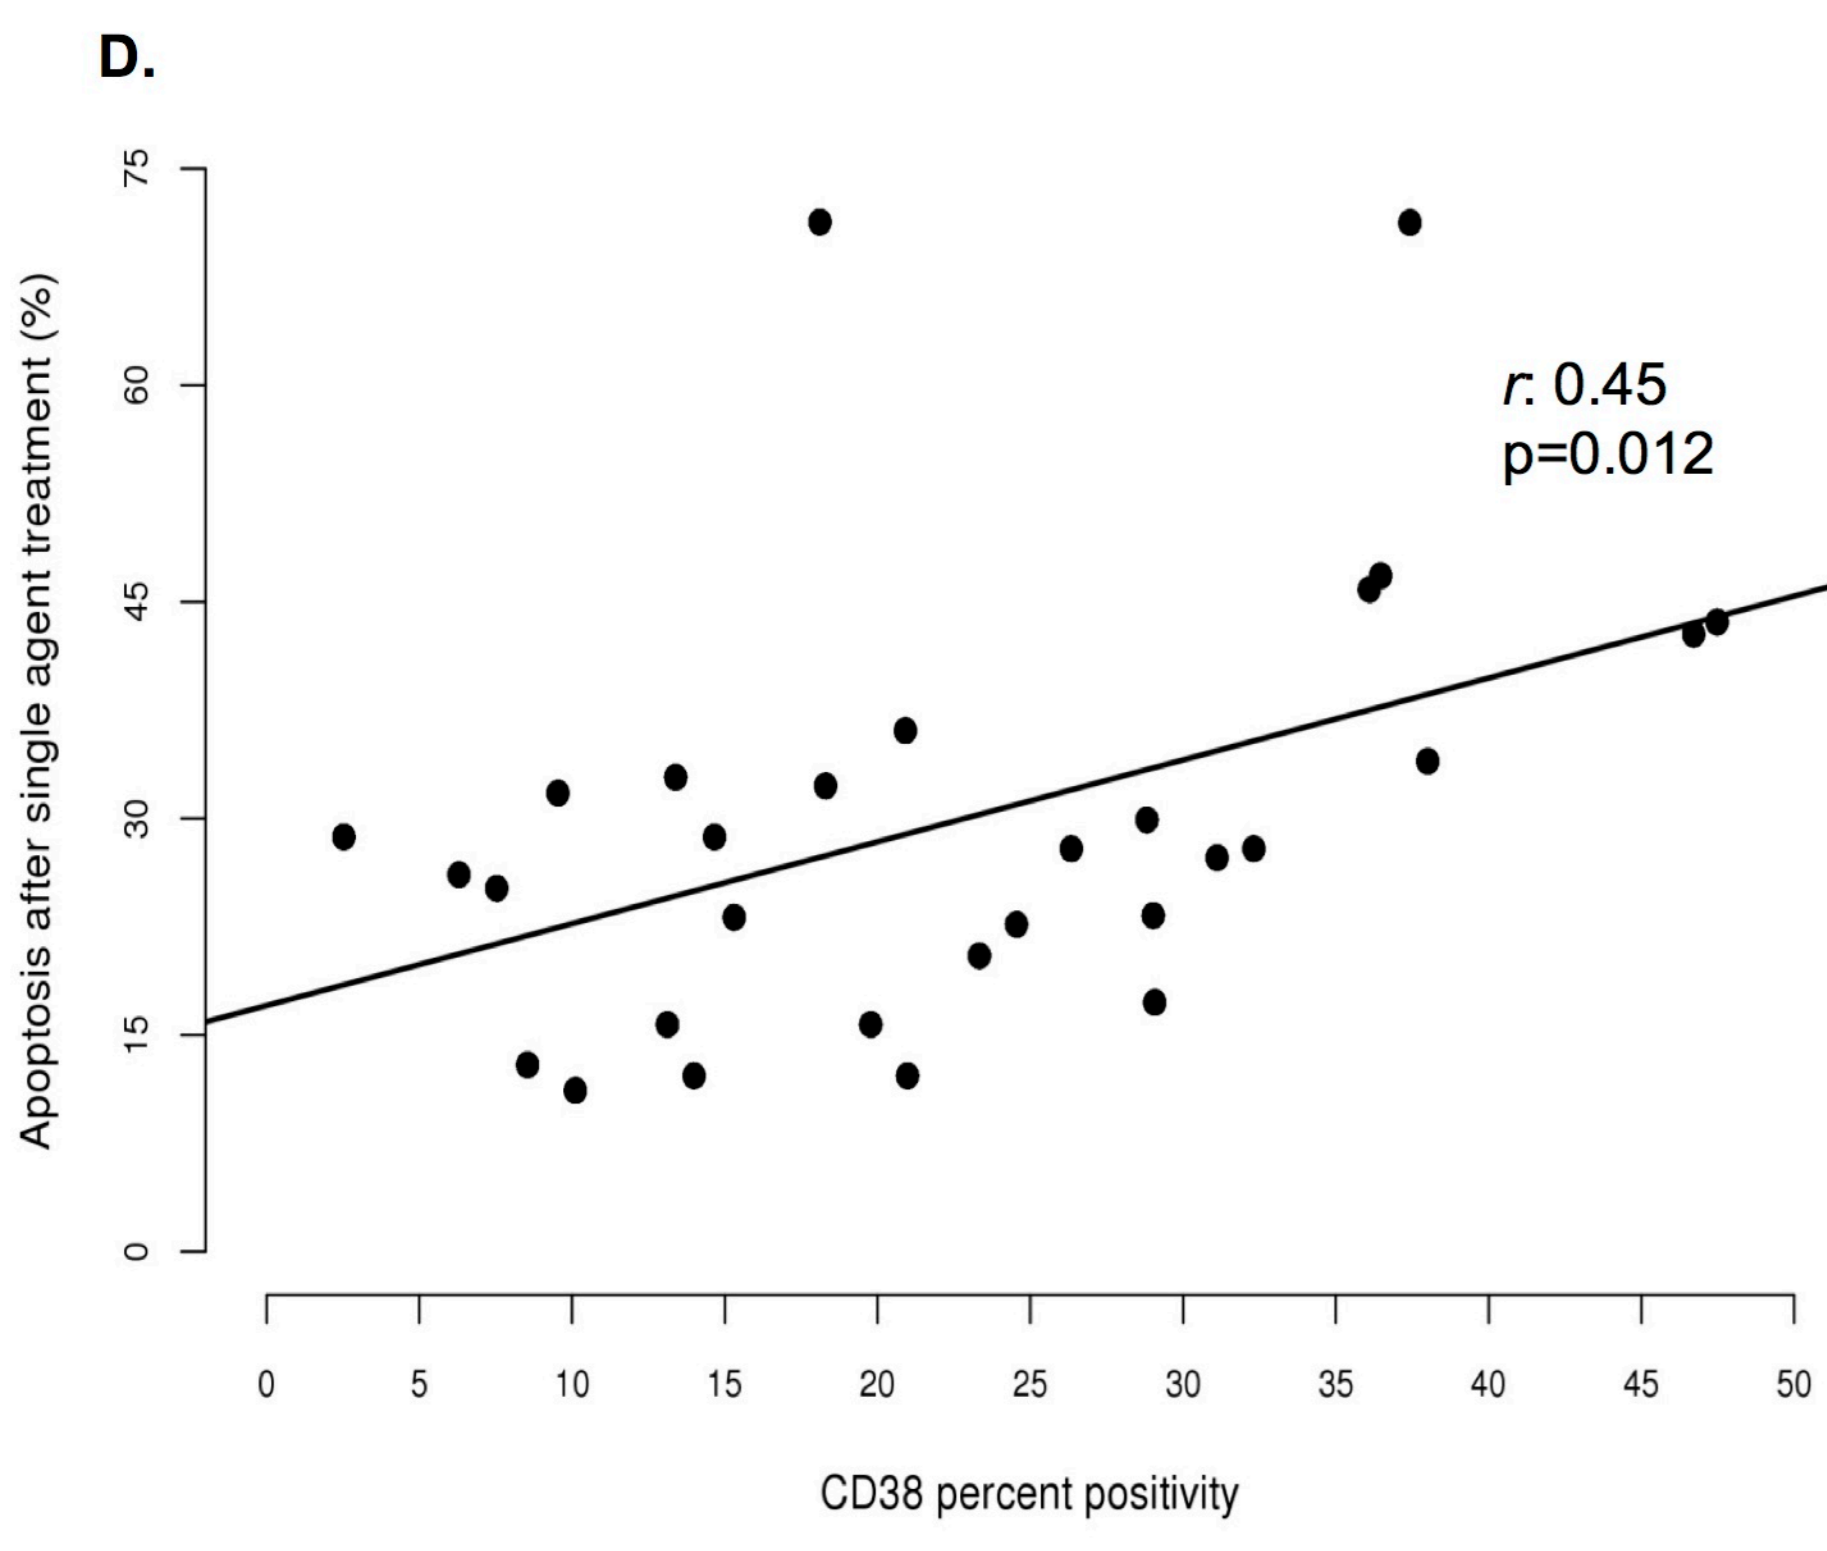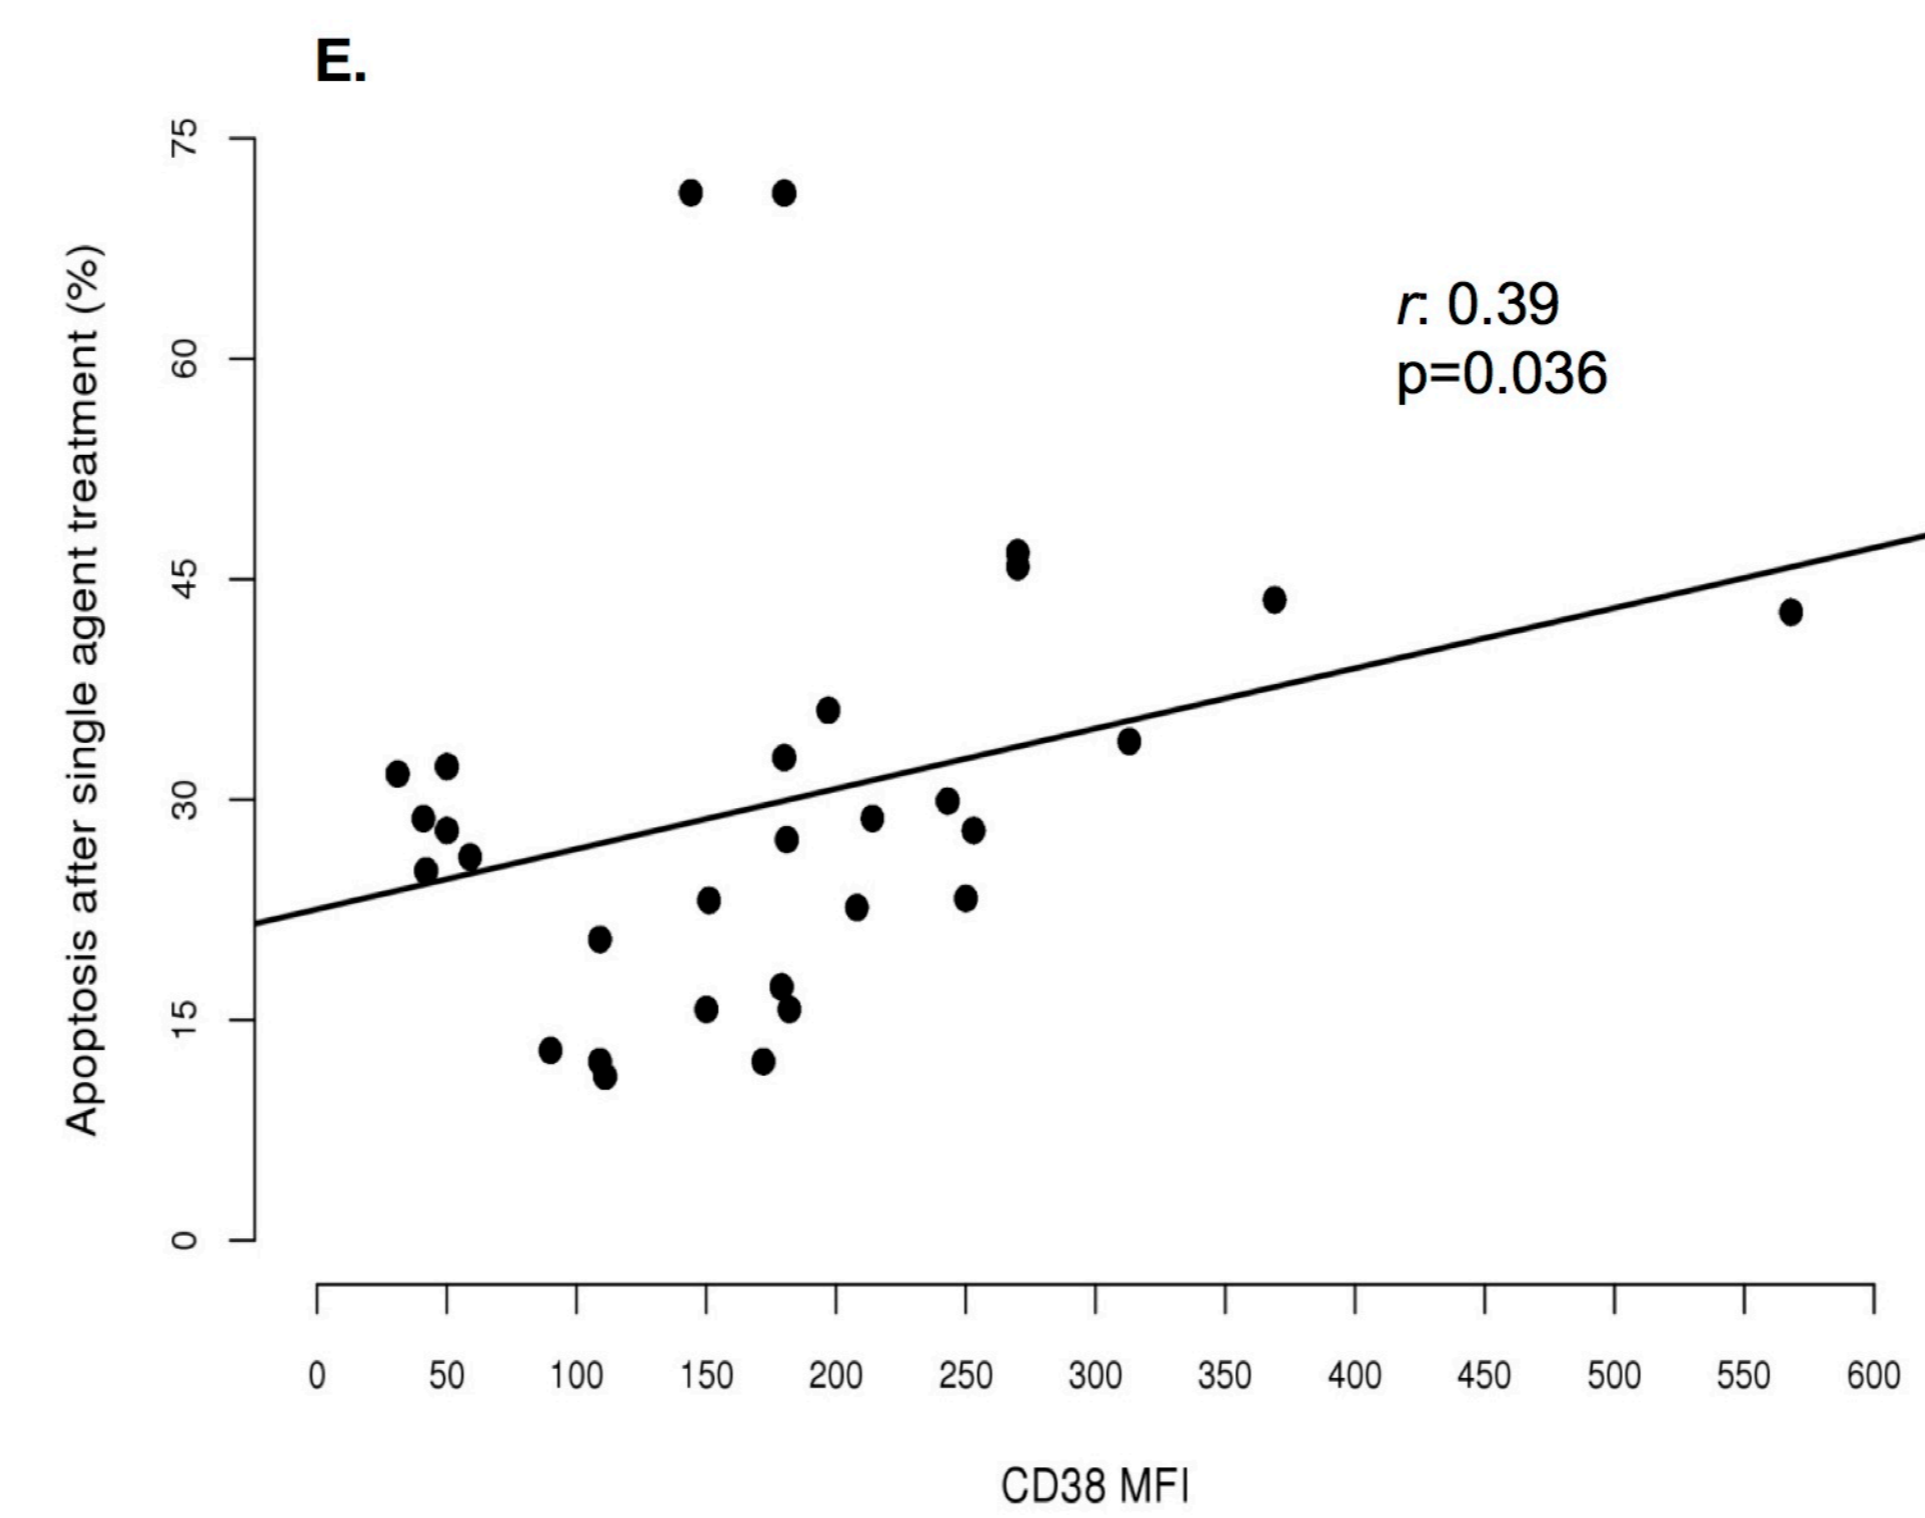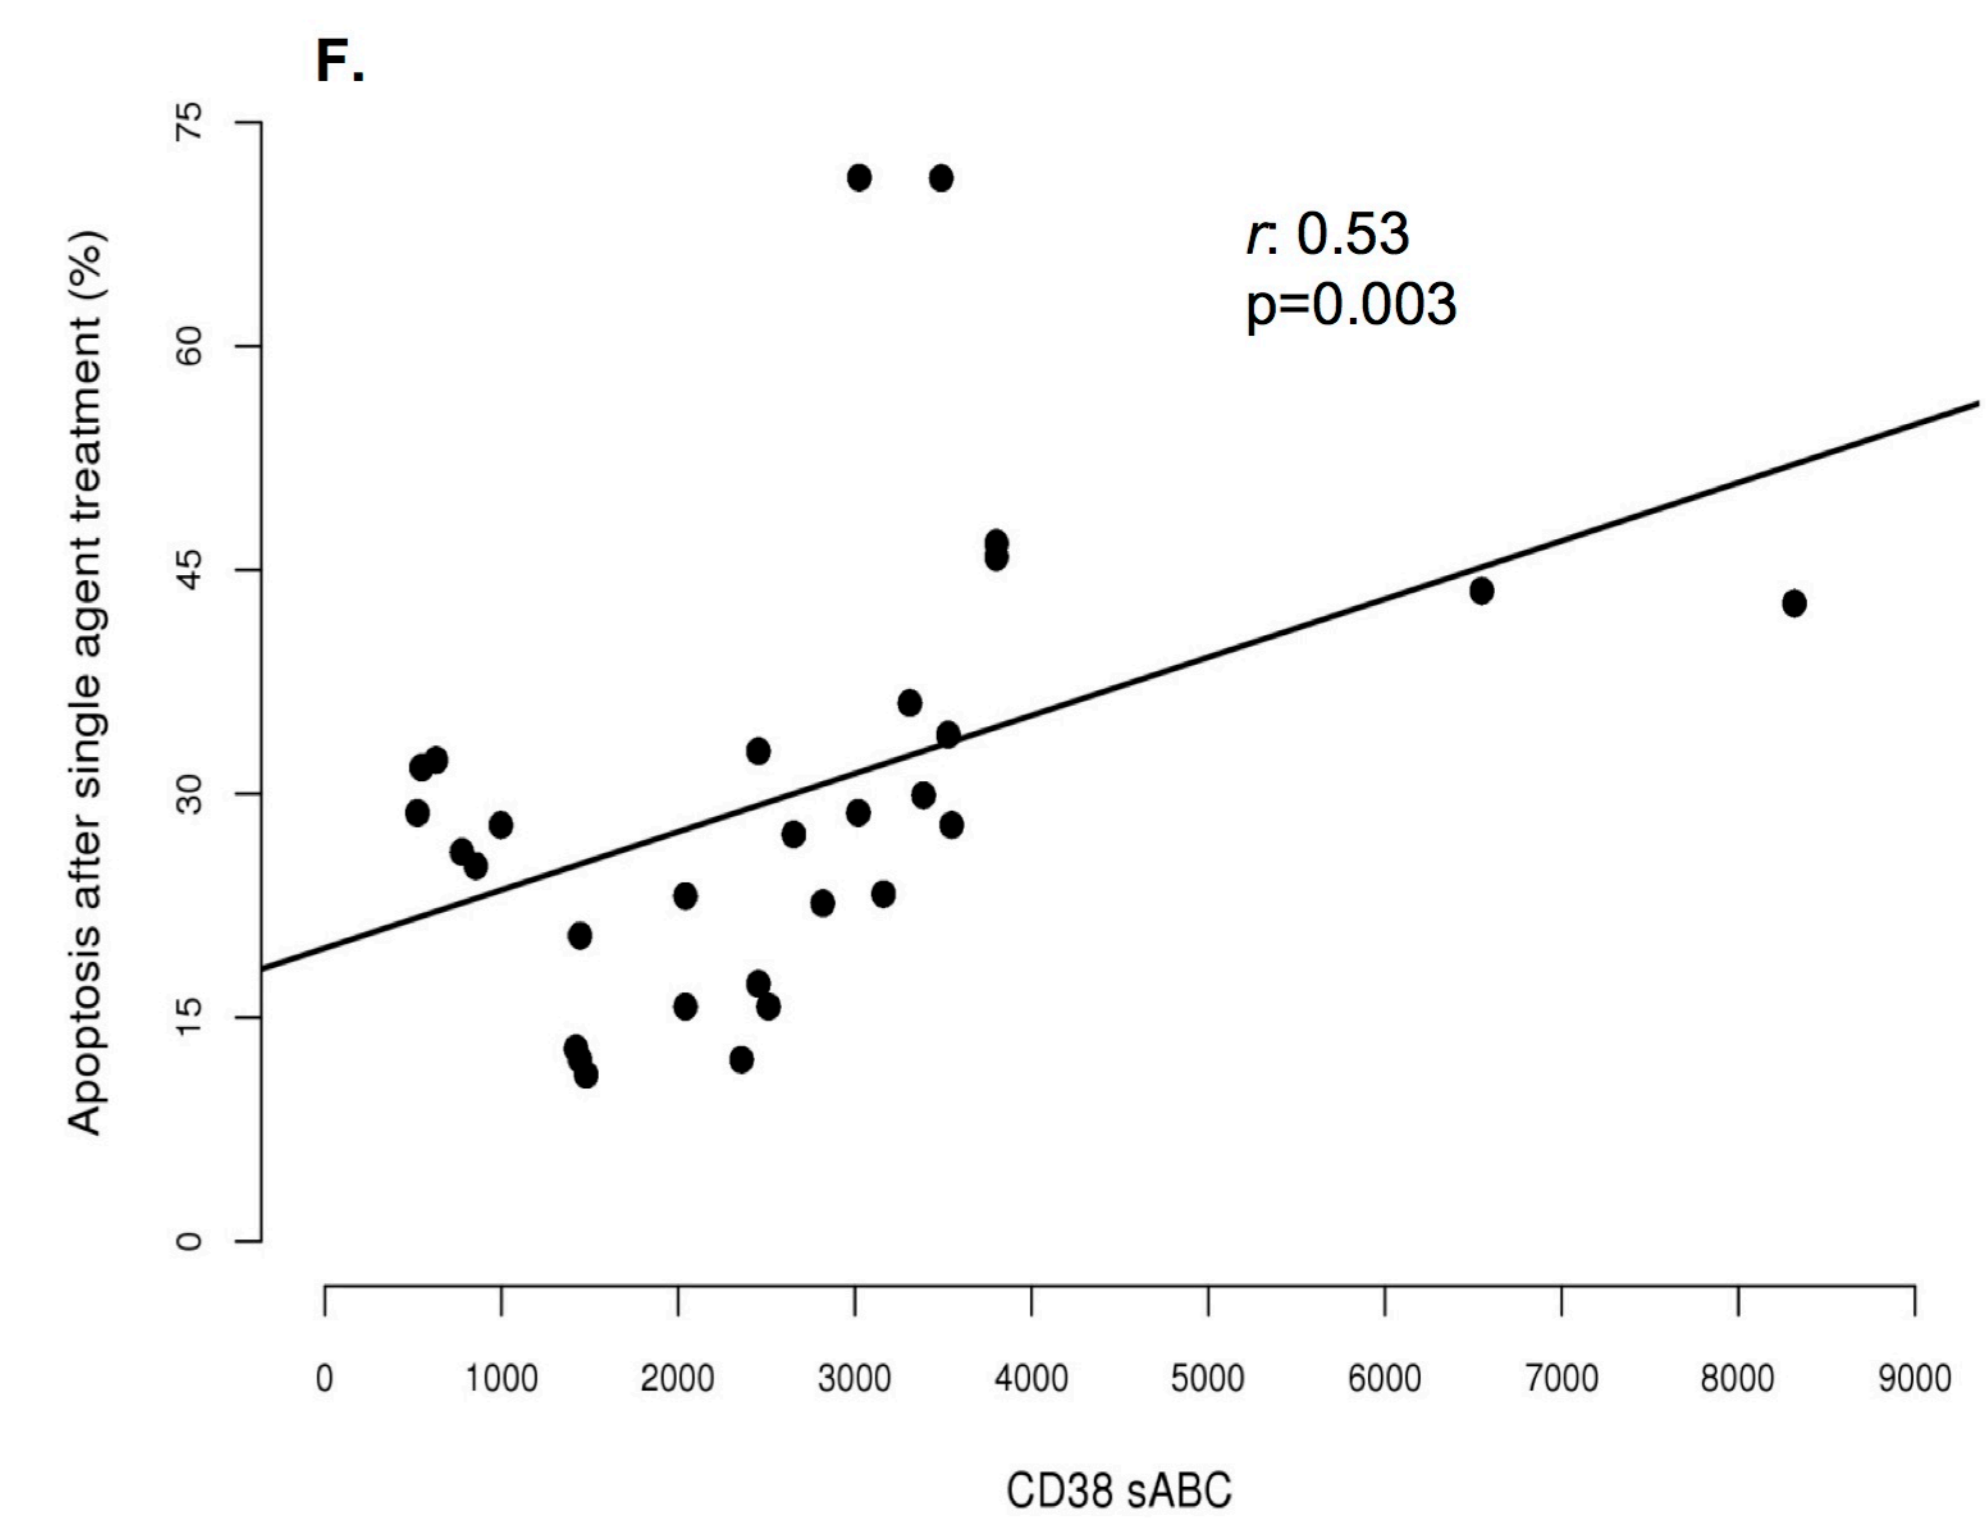



Supplemental Figure 6

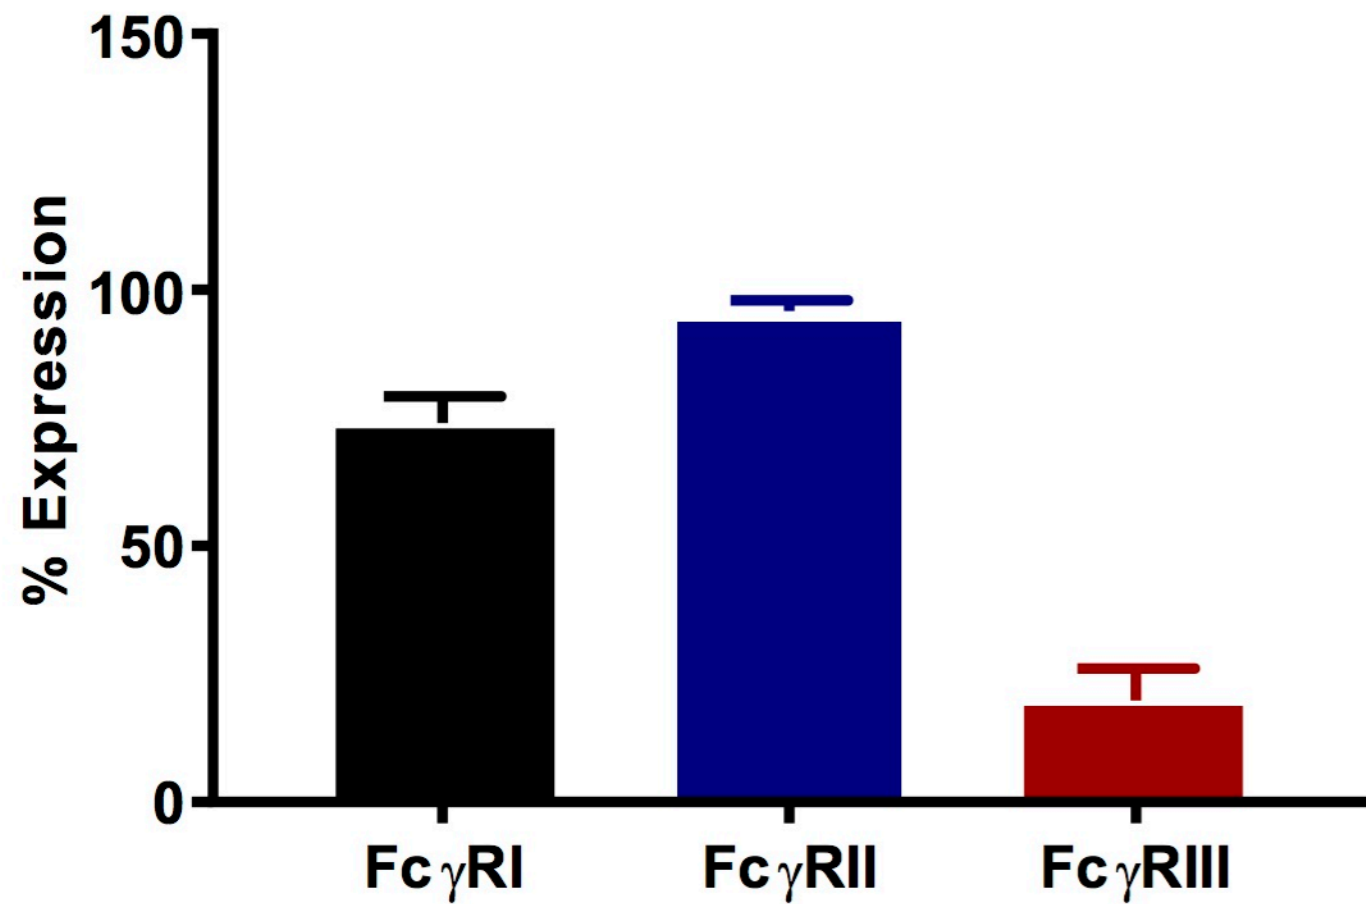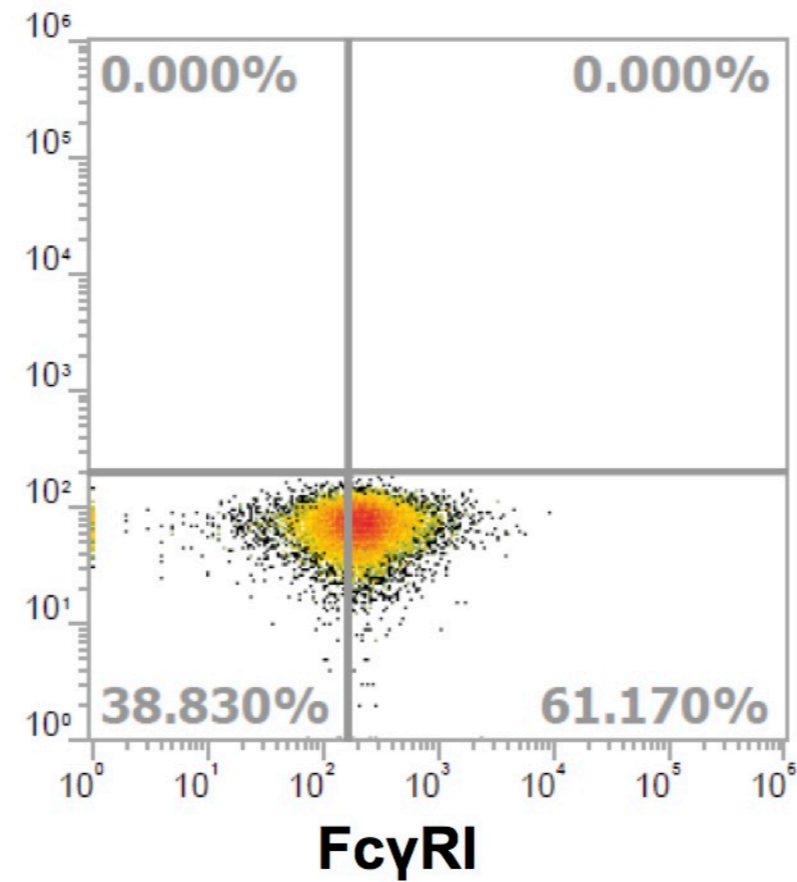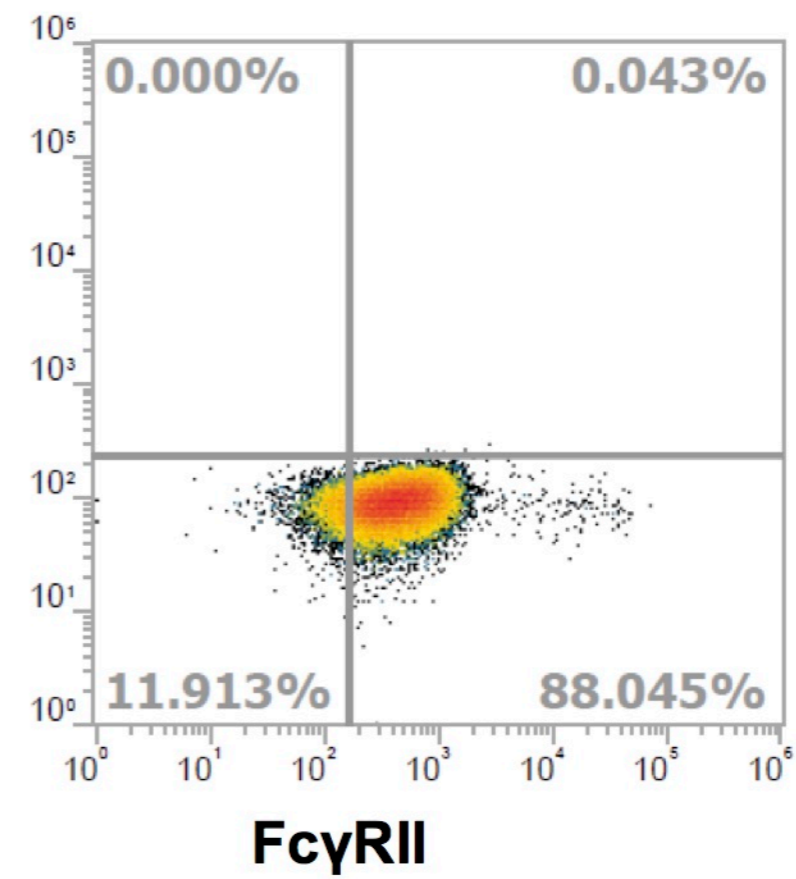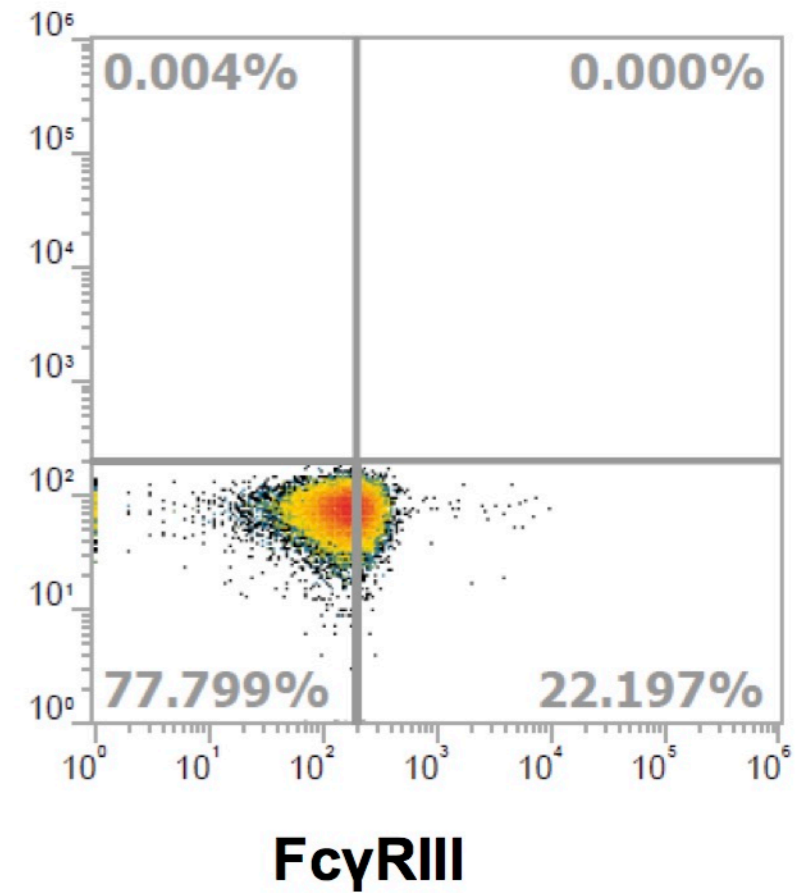



Supplemental Figure 7

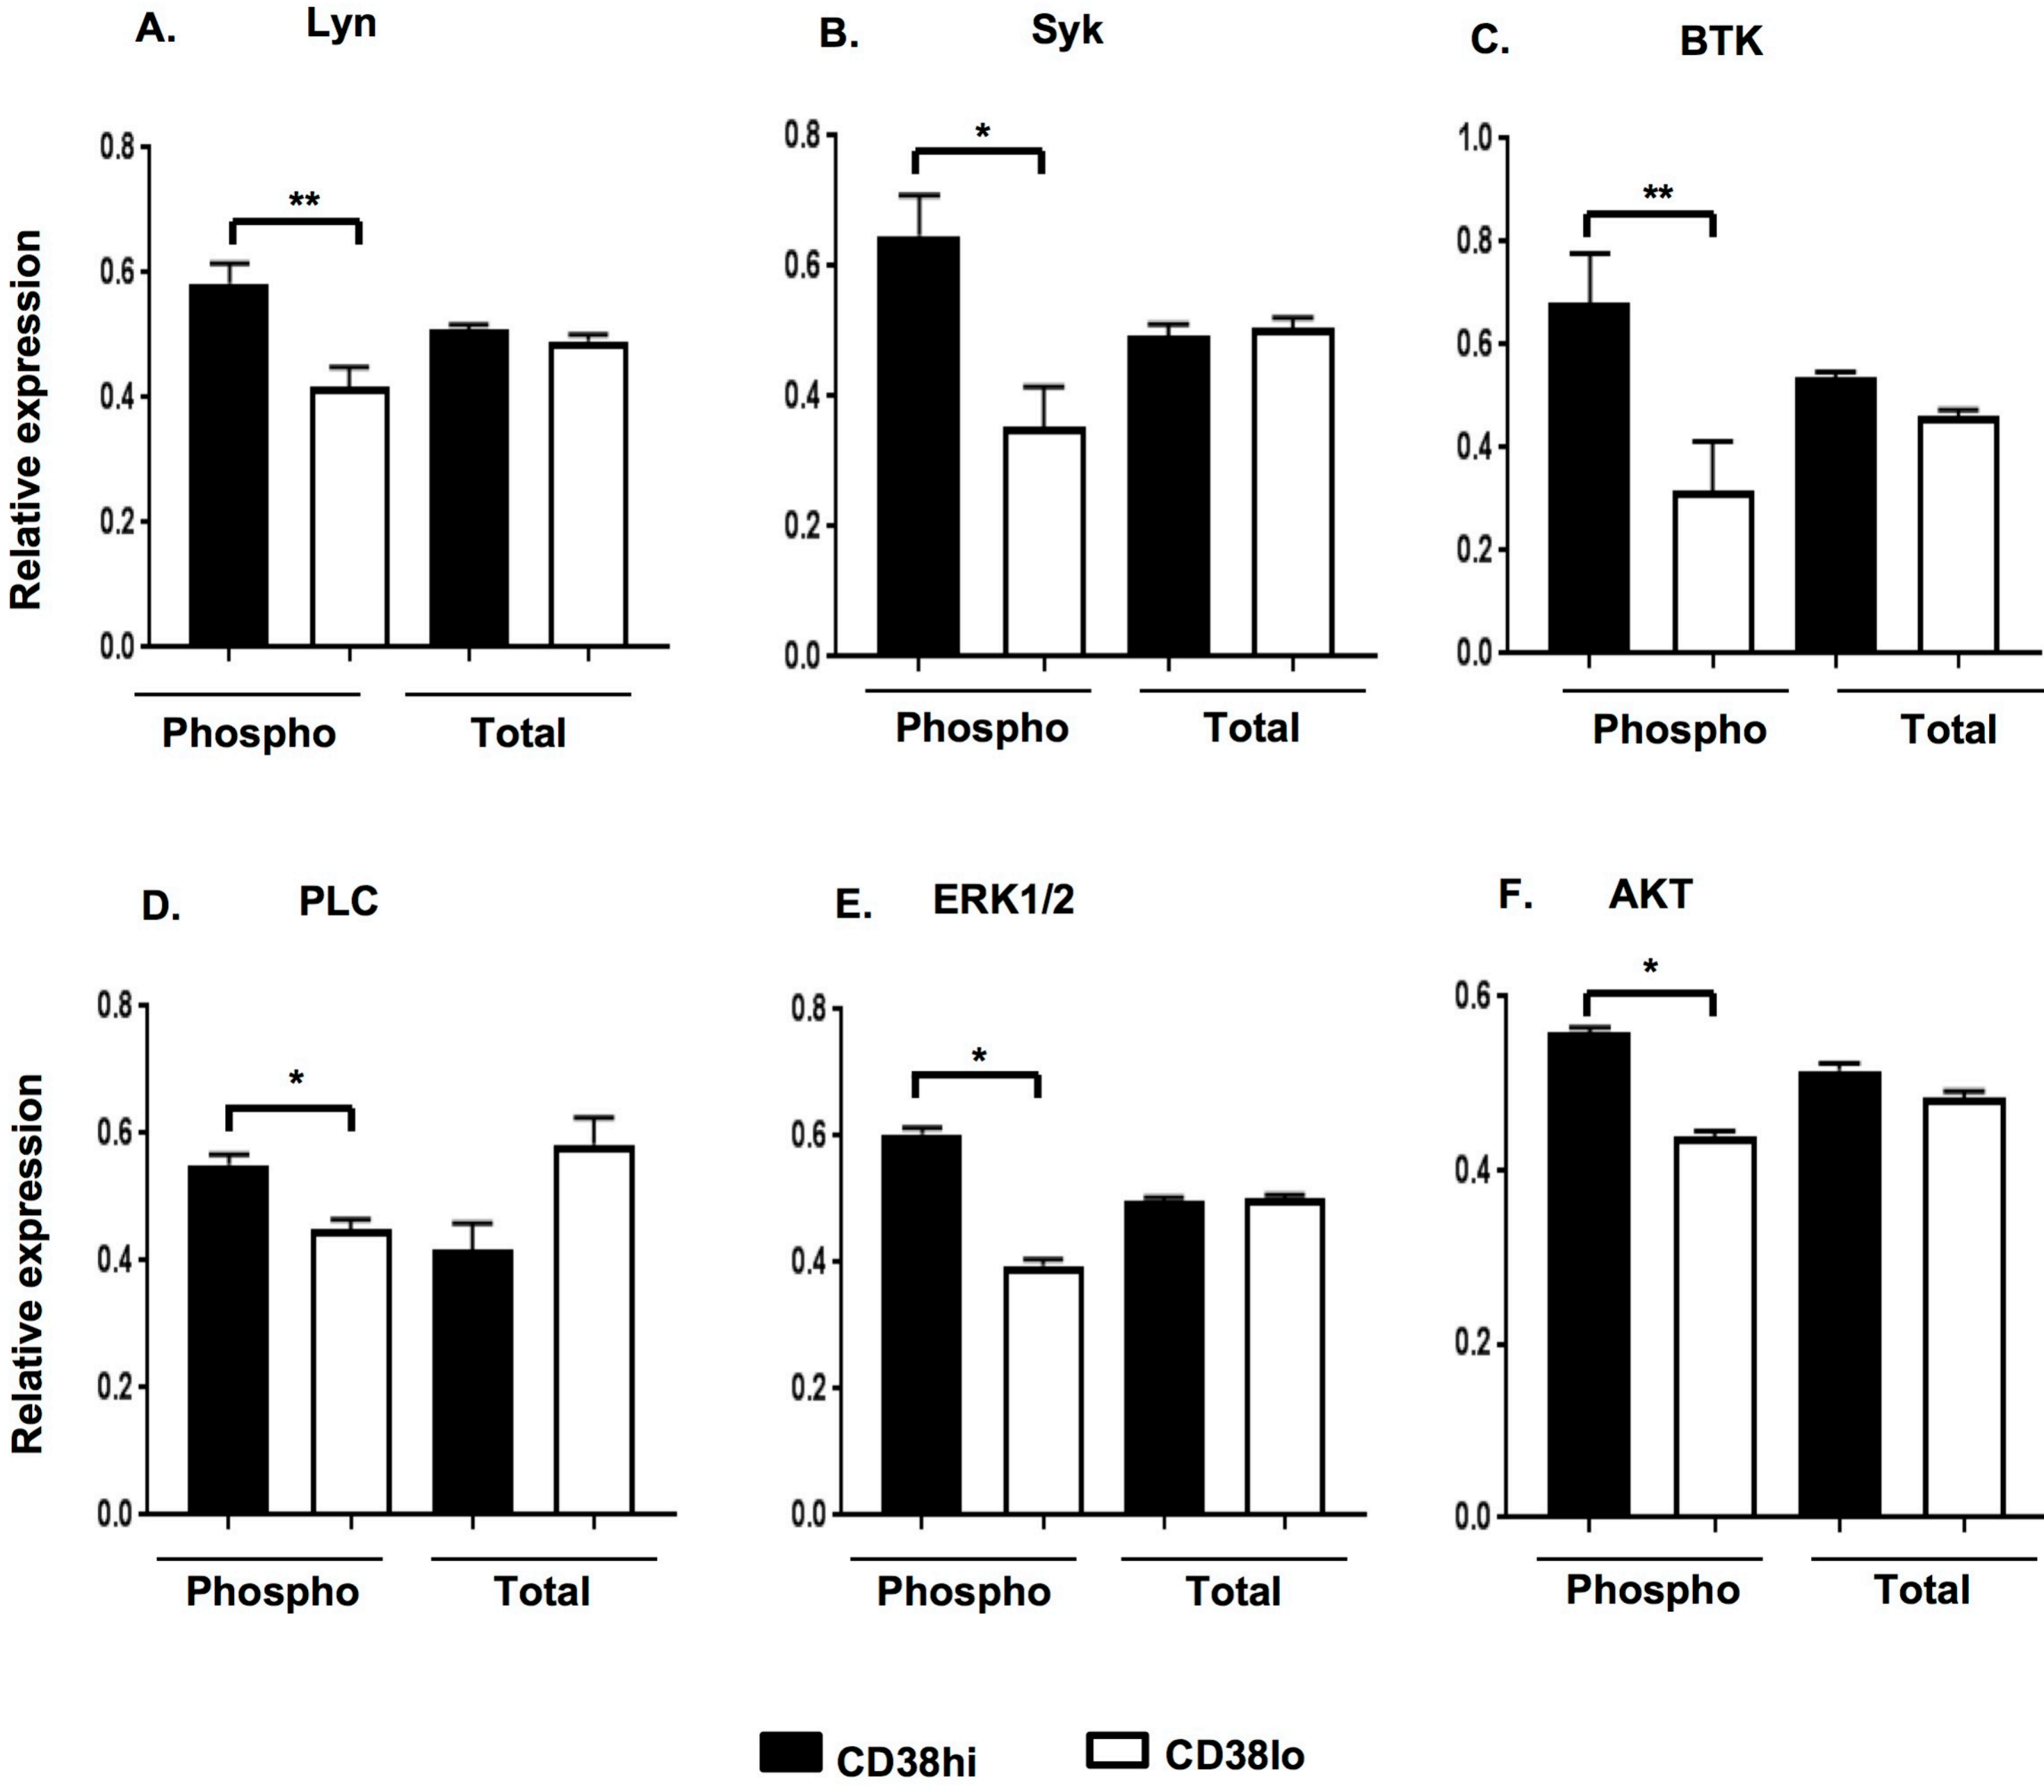

\*\*p < 0.001

\*p < 0.05

Supplemental Figure 8

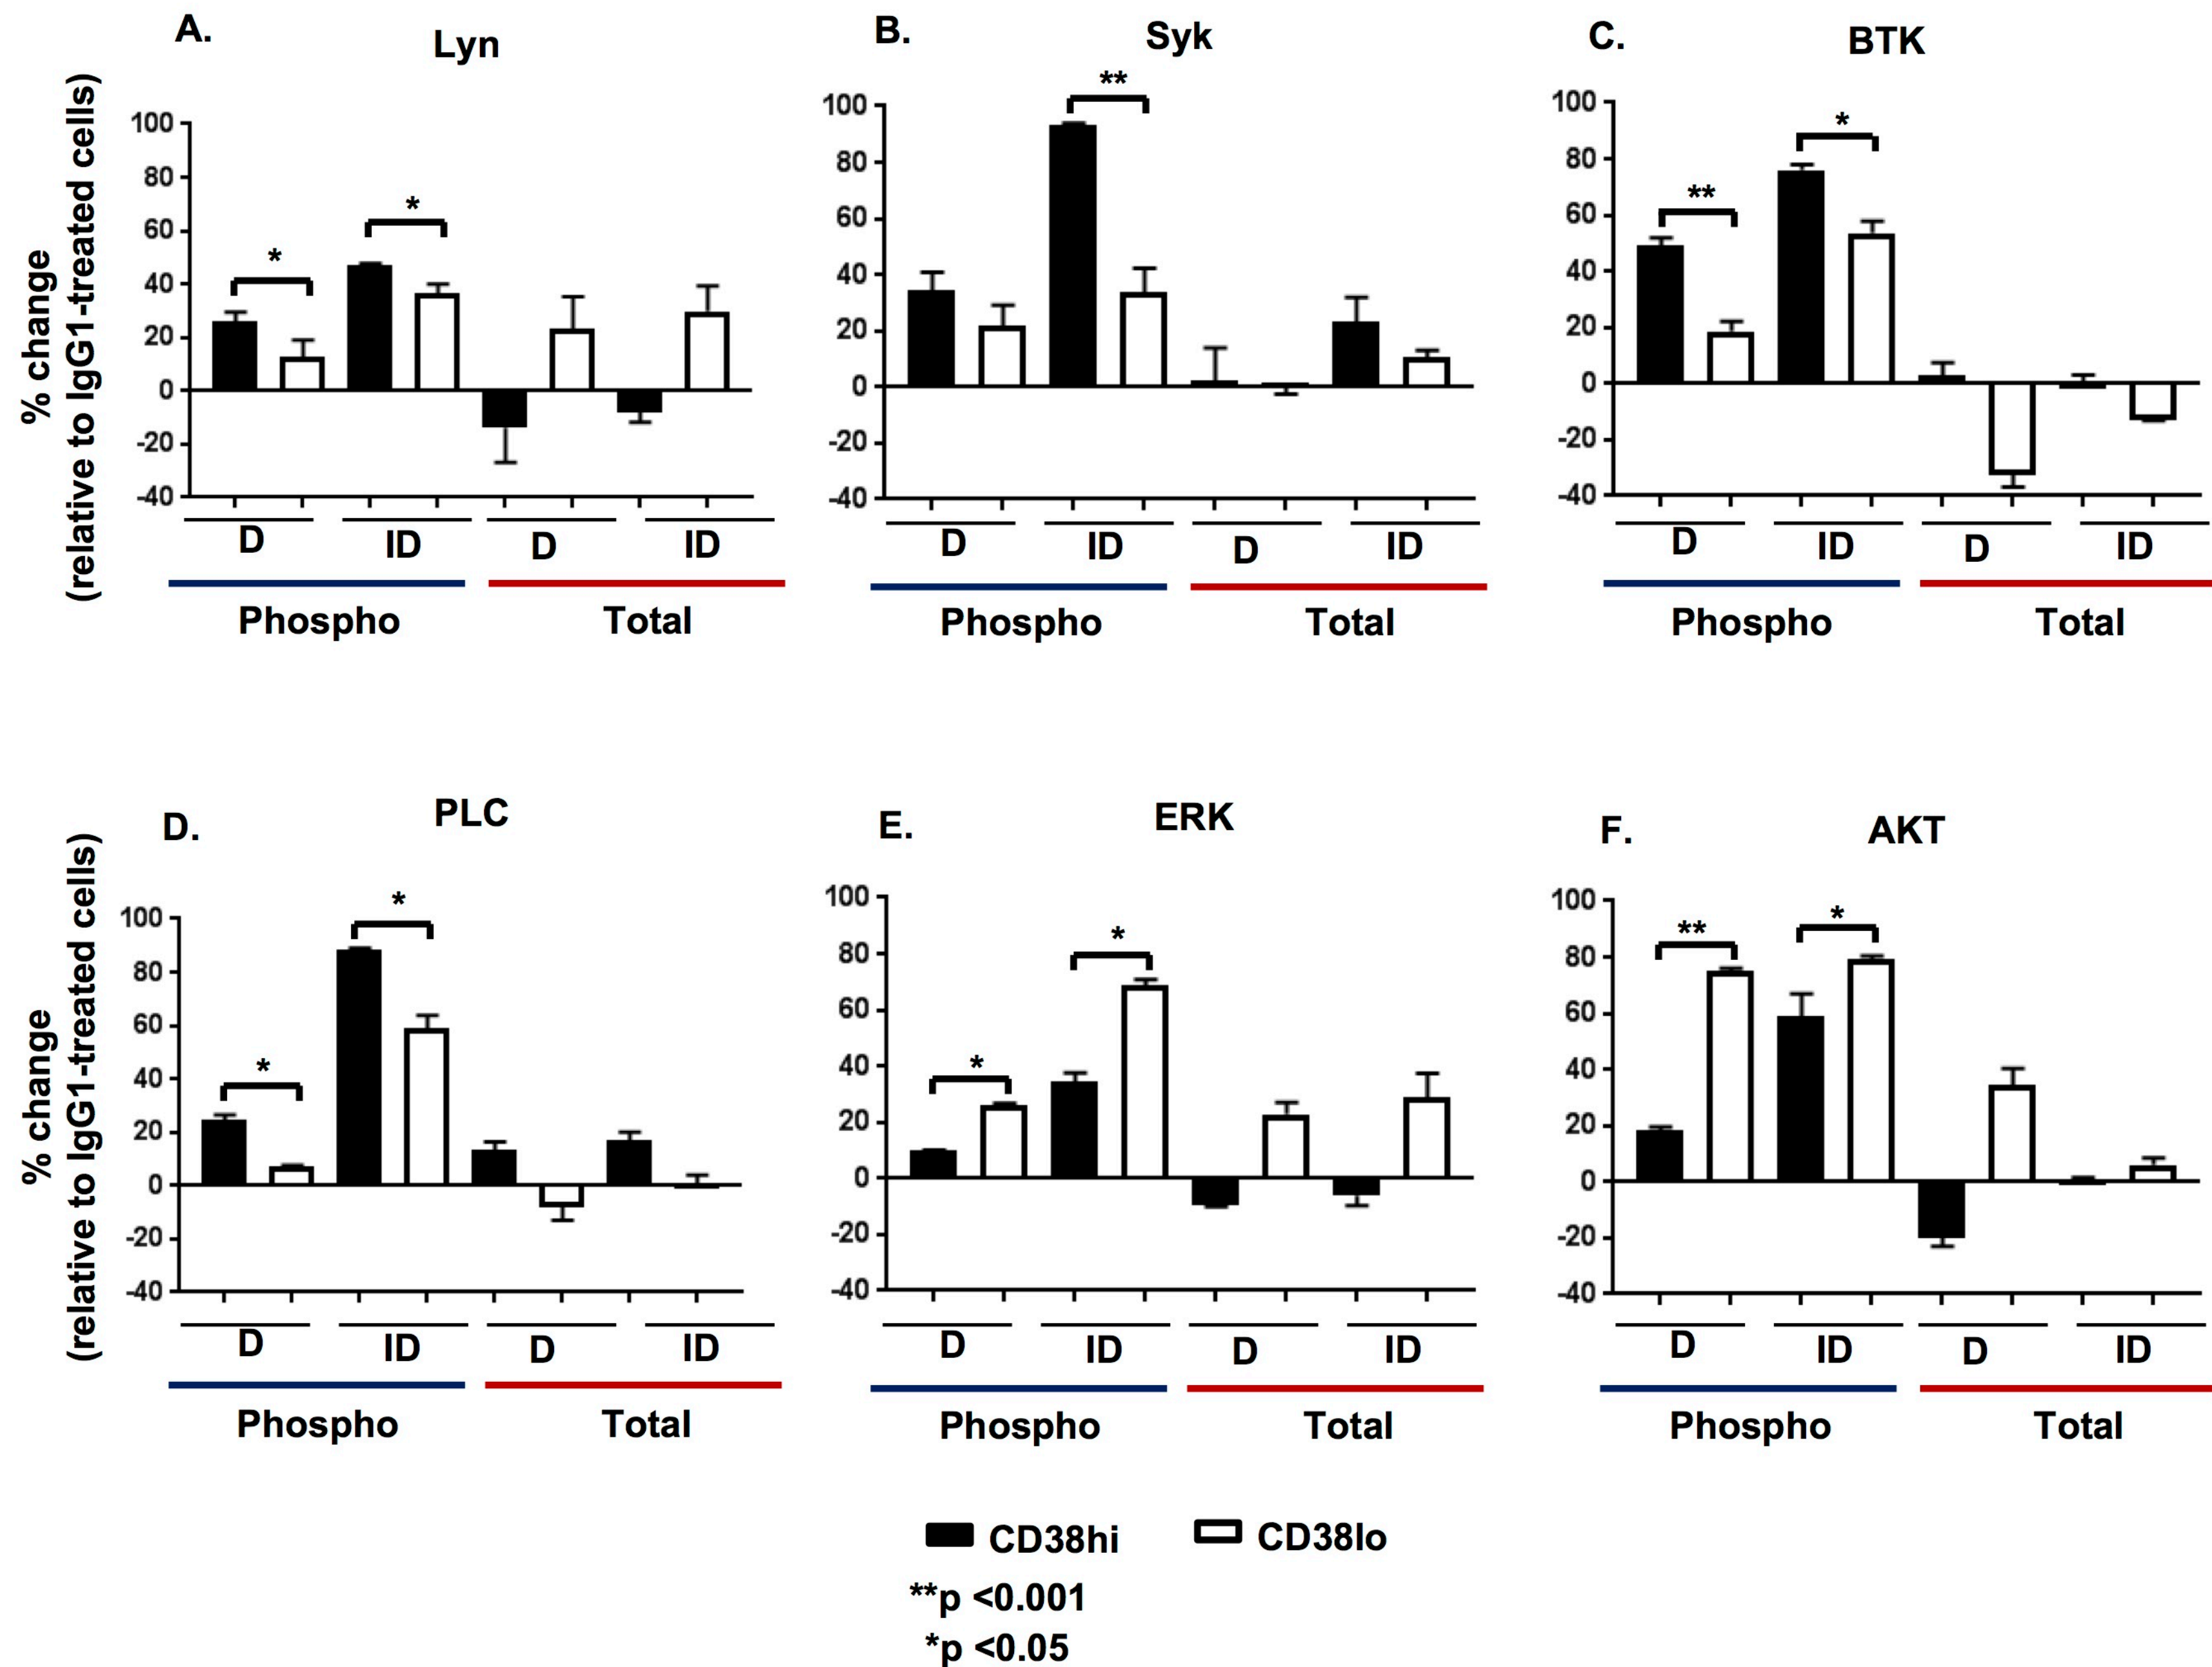

Supplemental Figure 9

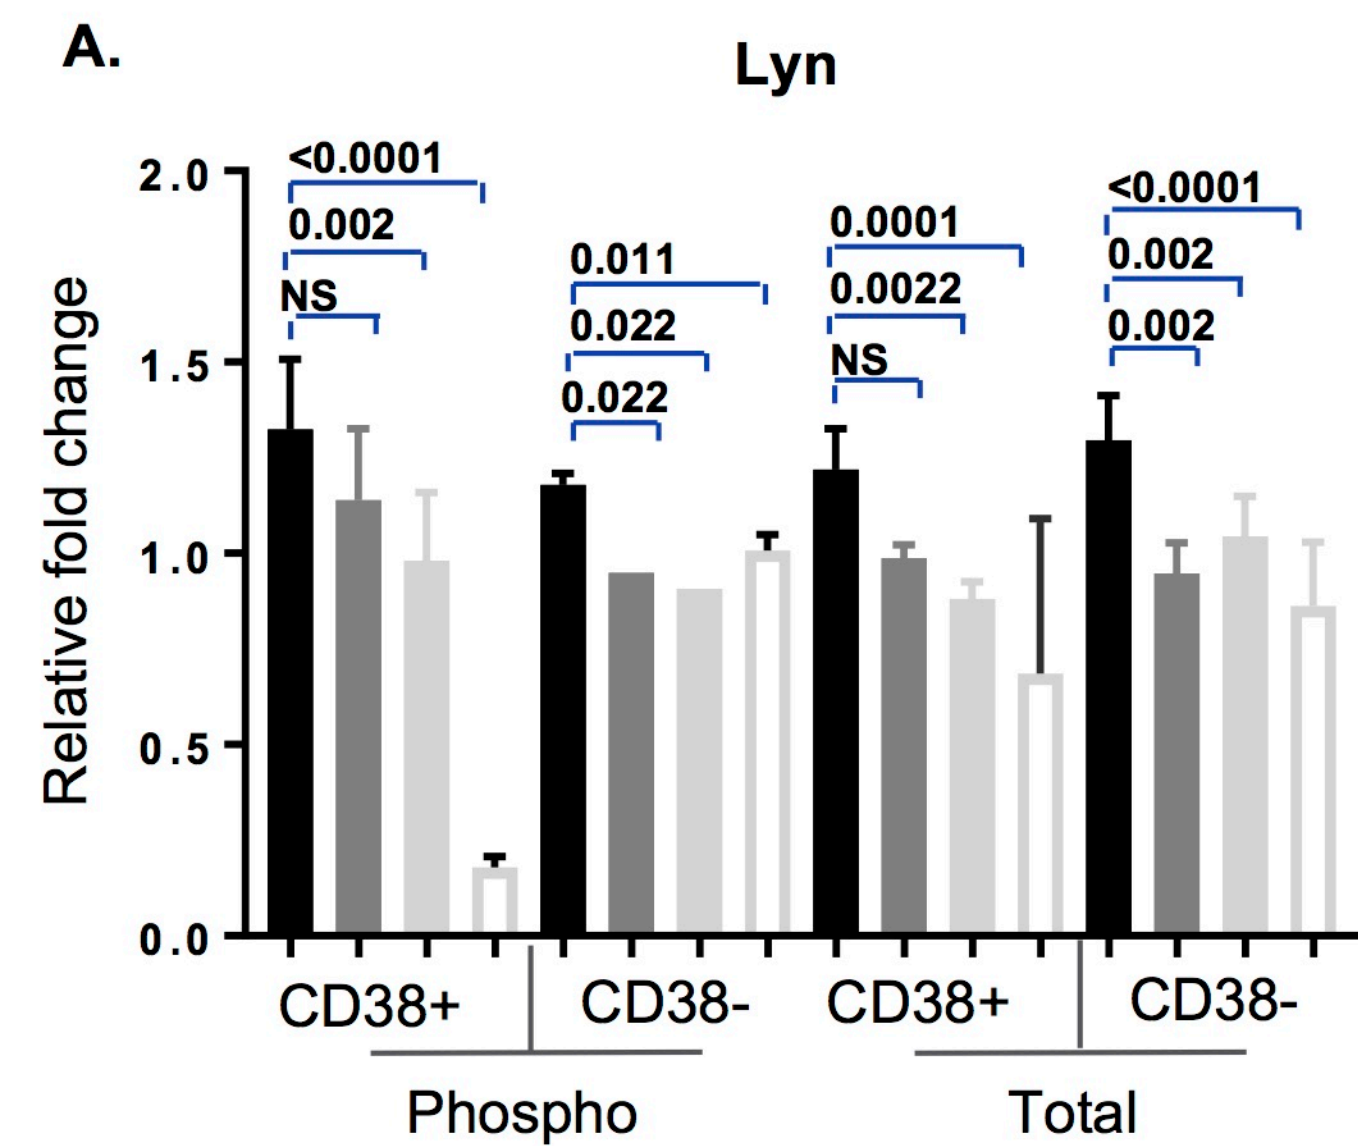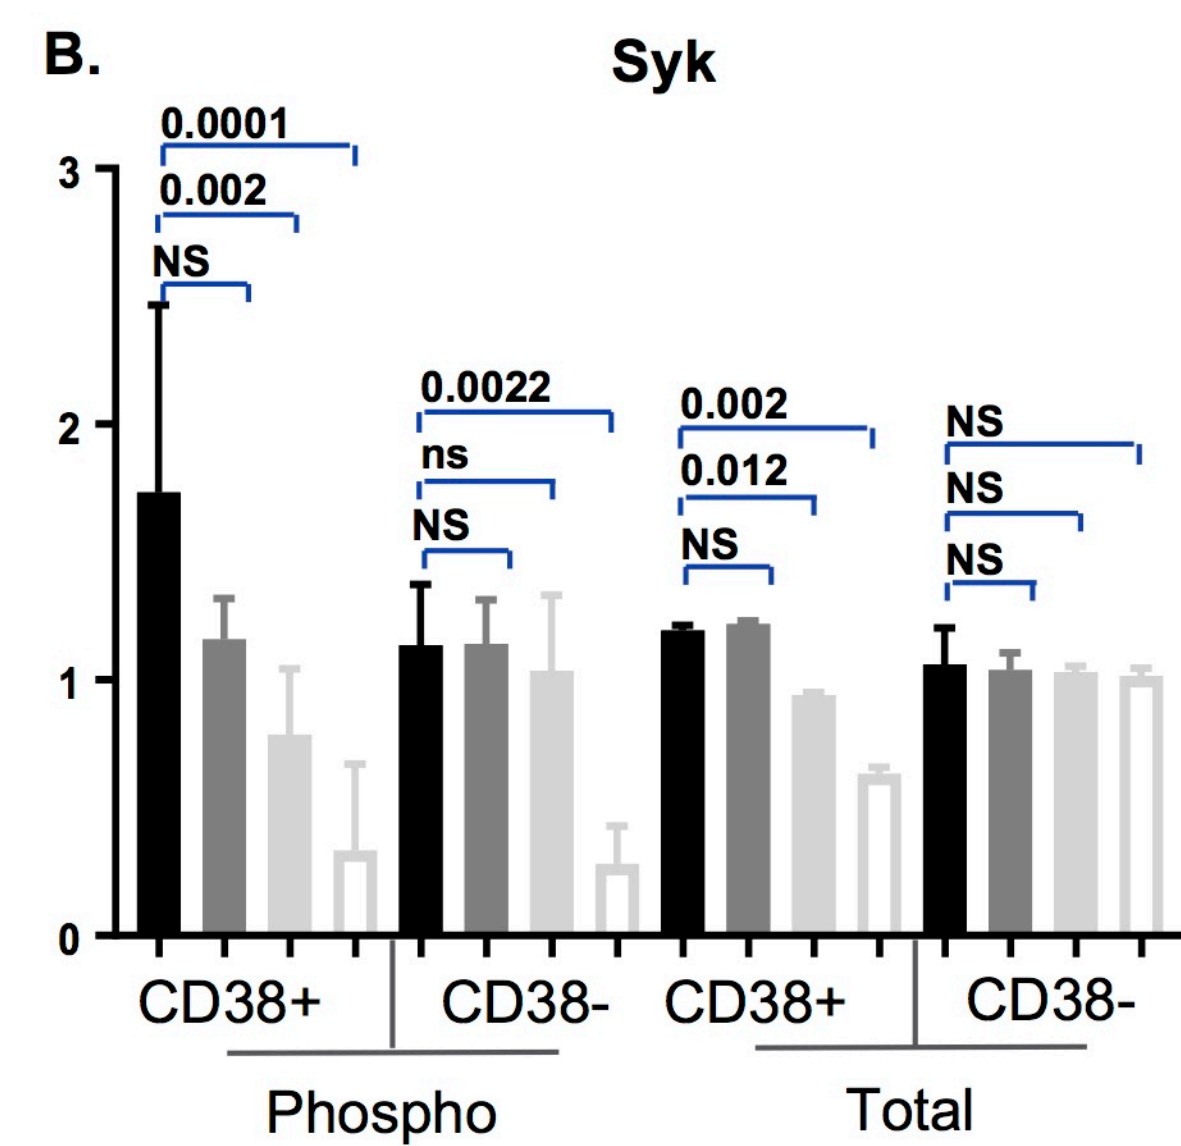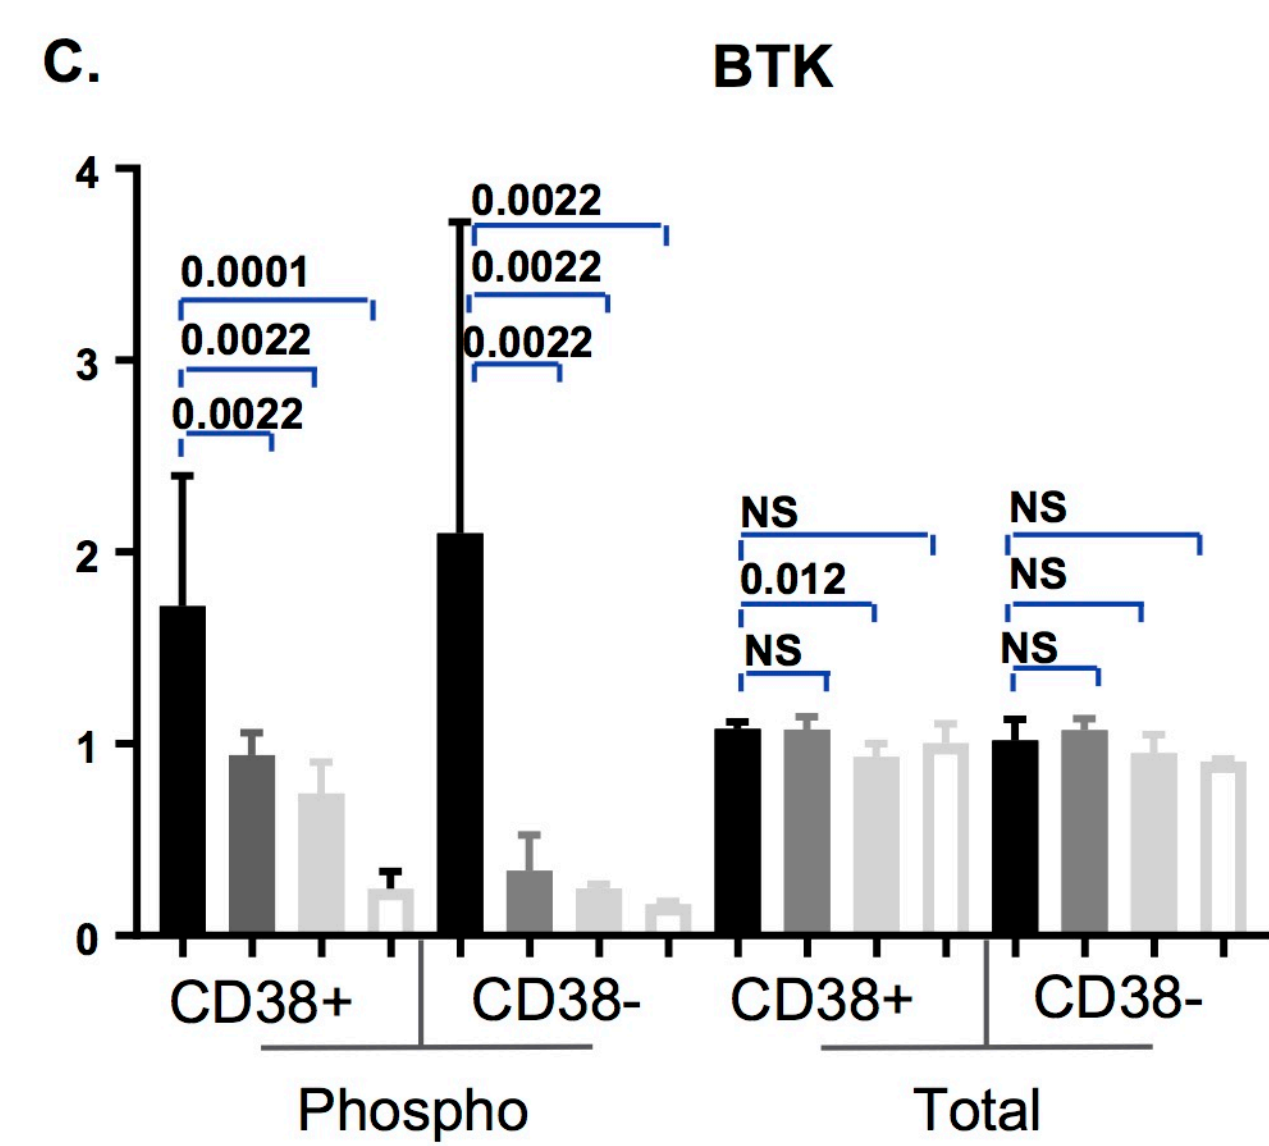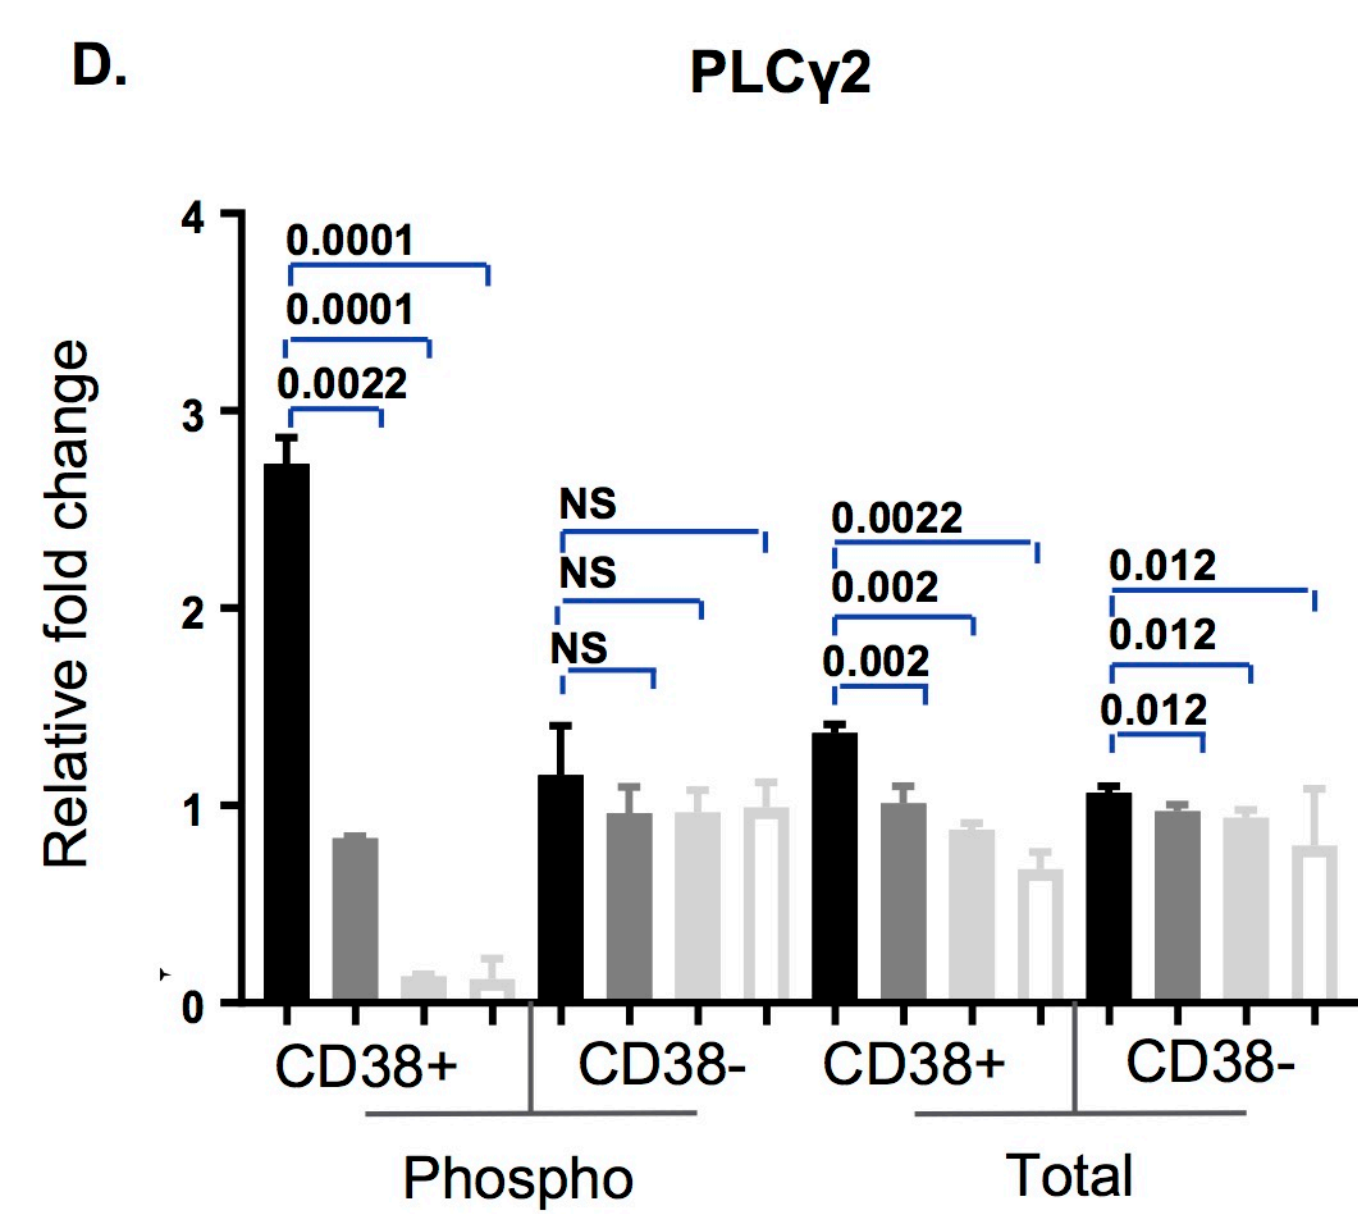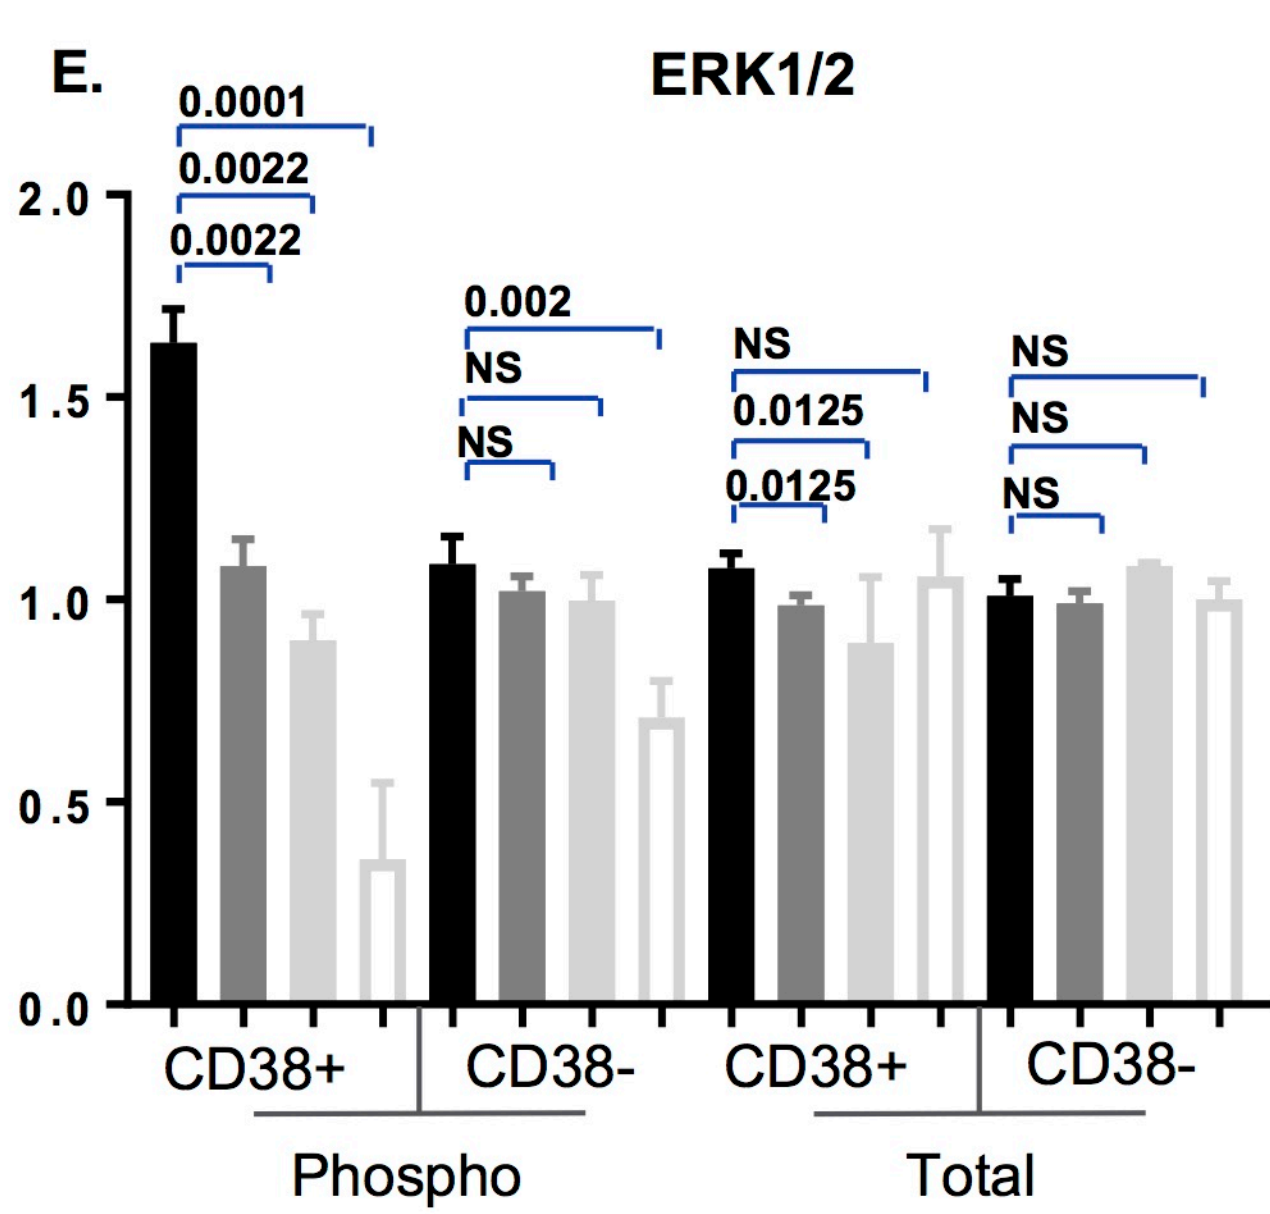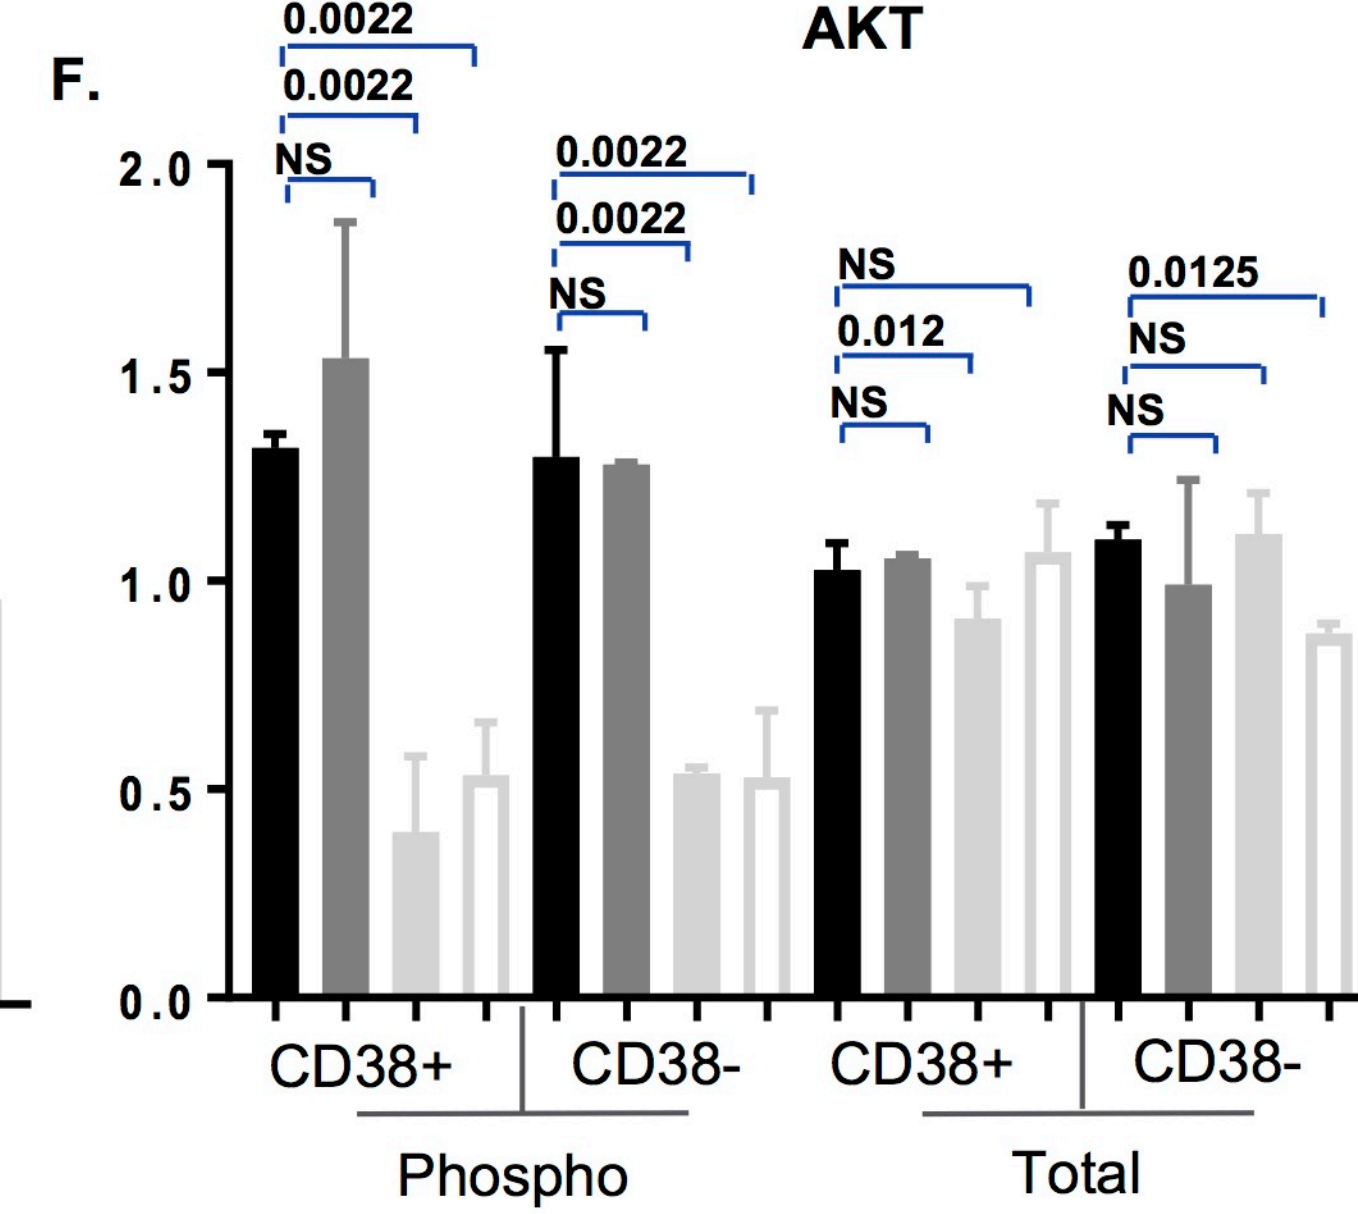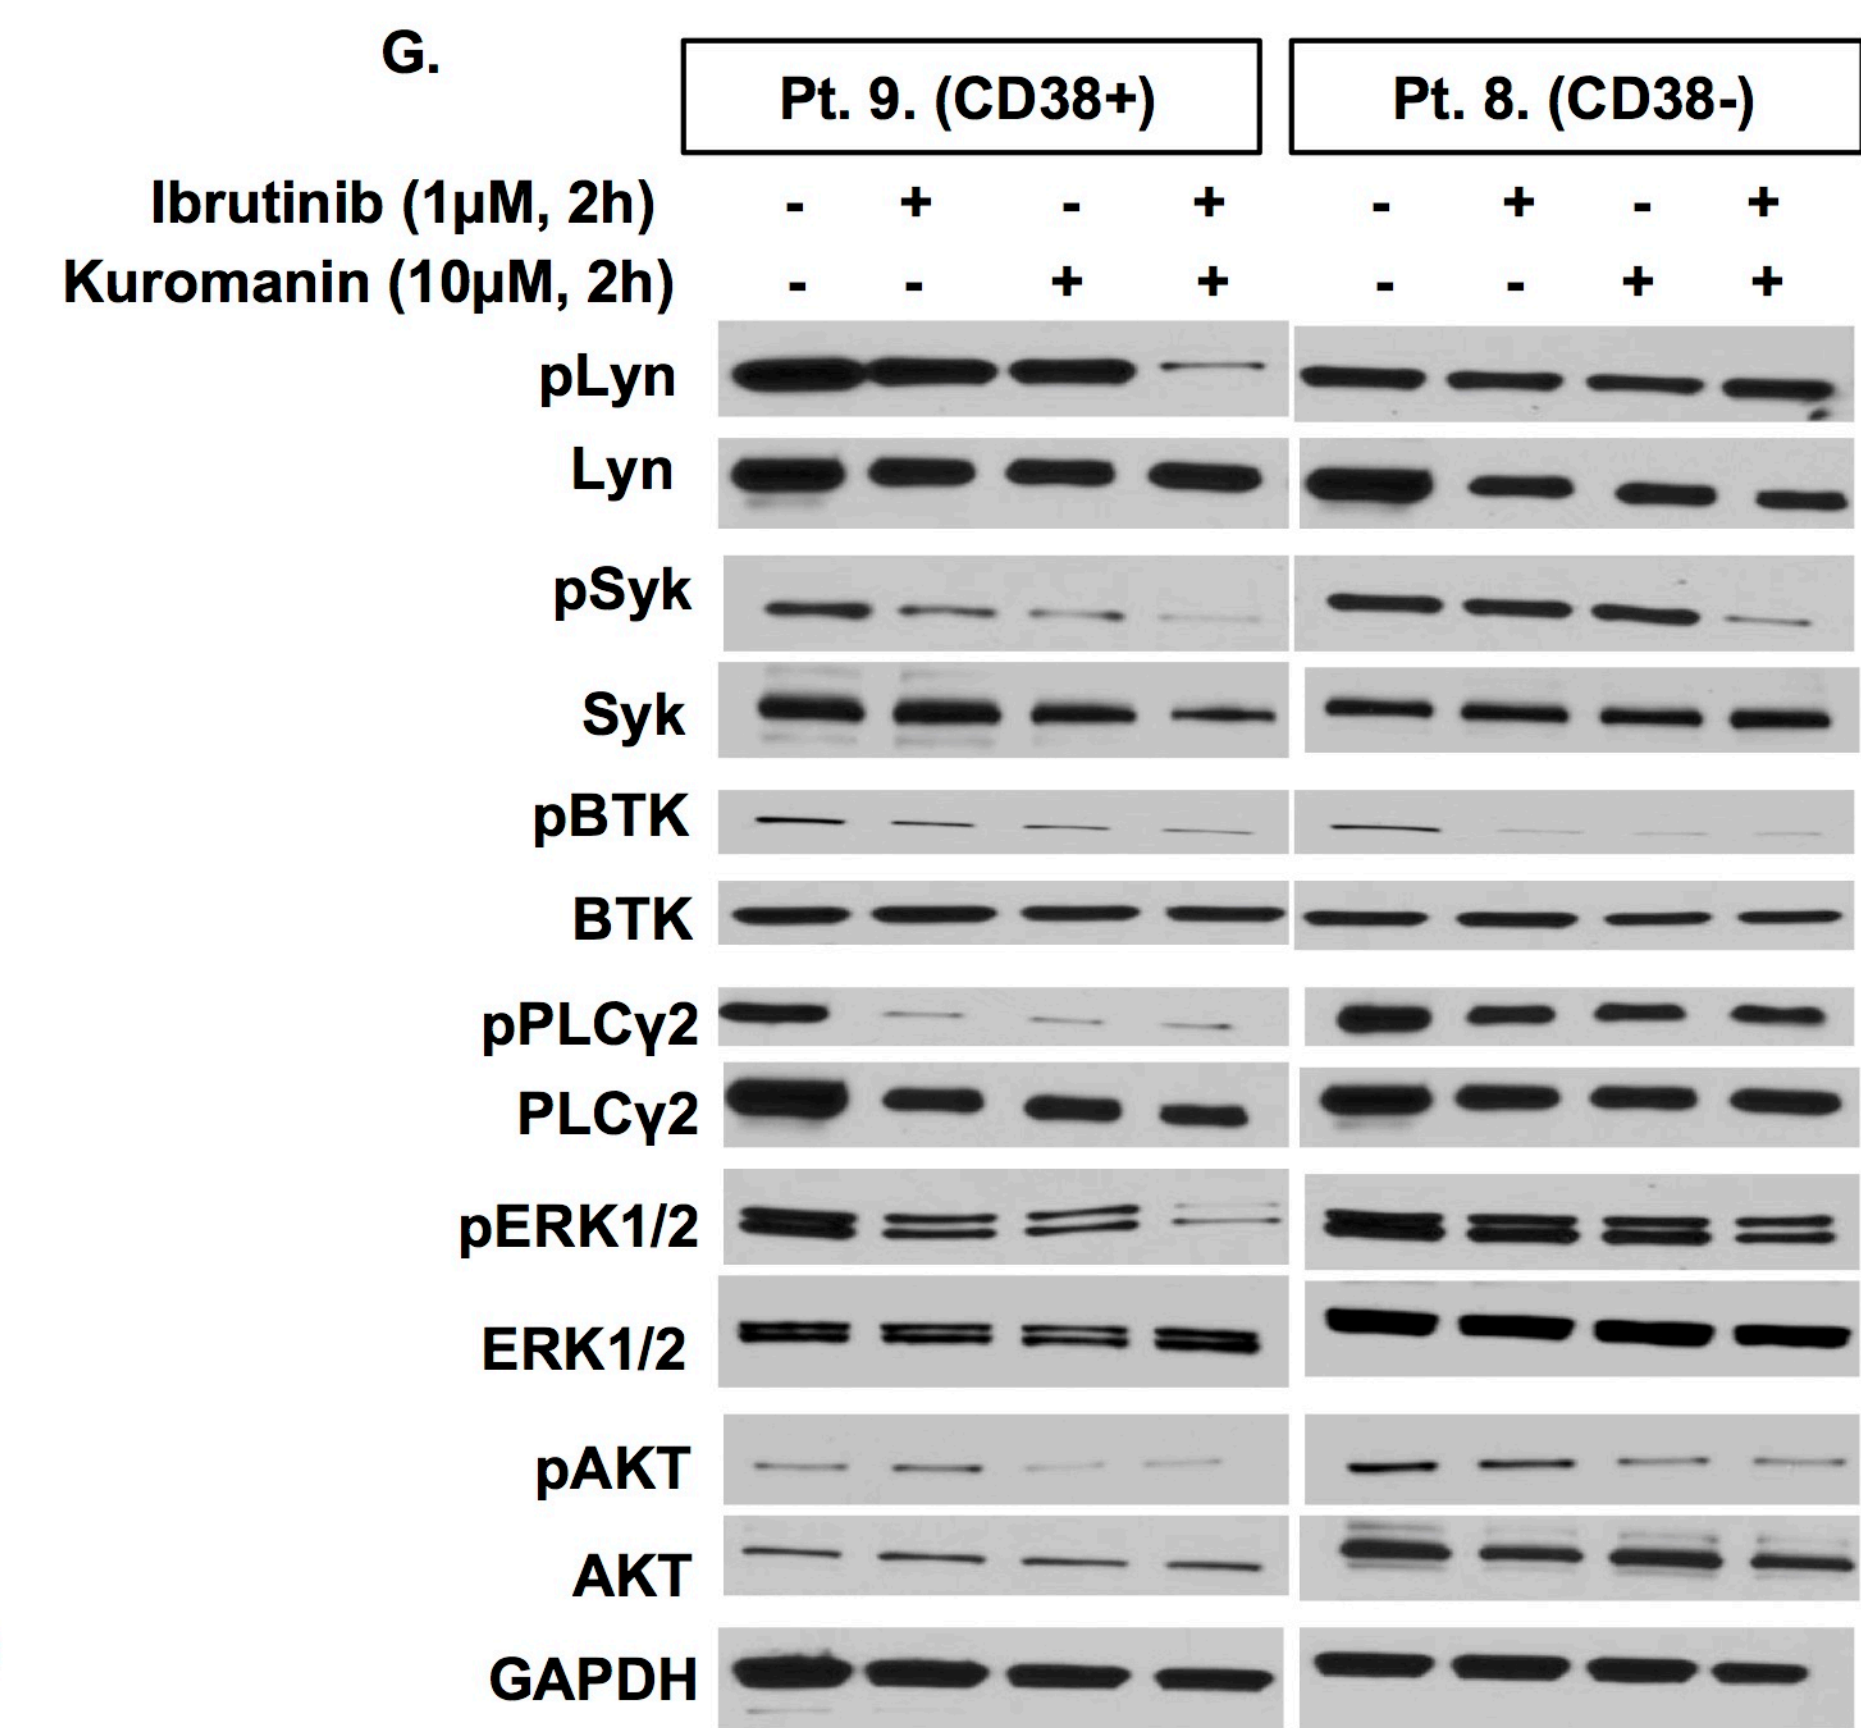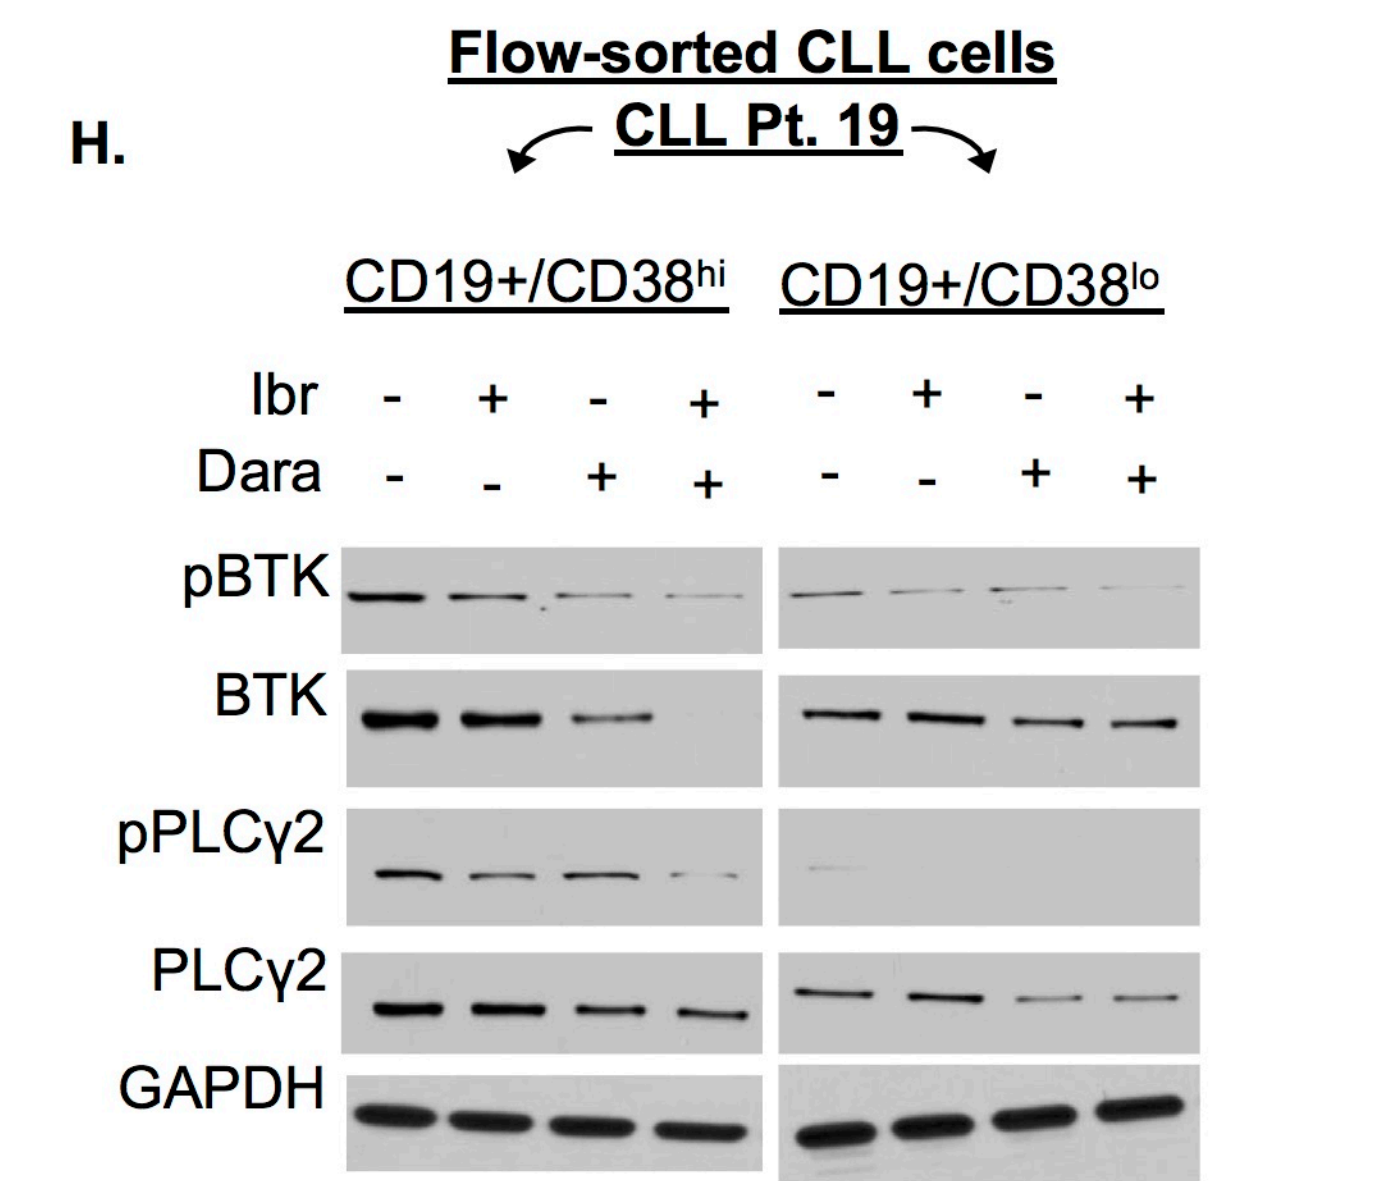

■ IgG1  
 ■ Ibrutinib  
 ■ Kuromanin  
 □ Kuromanin + Ibrutinib

# Supplemental Figure 10

## CD38+ (Pts. n= 4)

## CD38- (Pts. n= 5)

**A.**

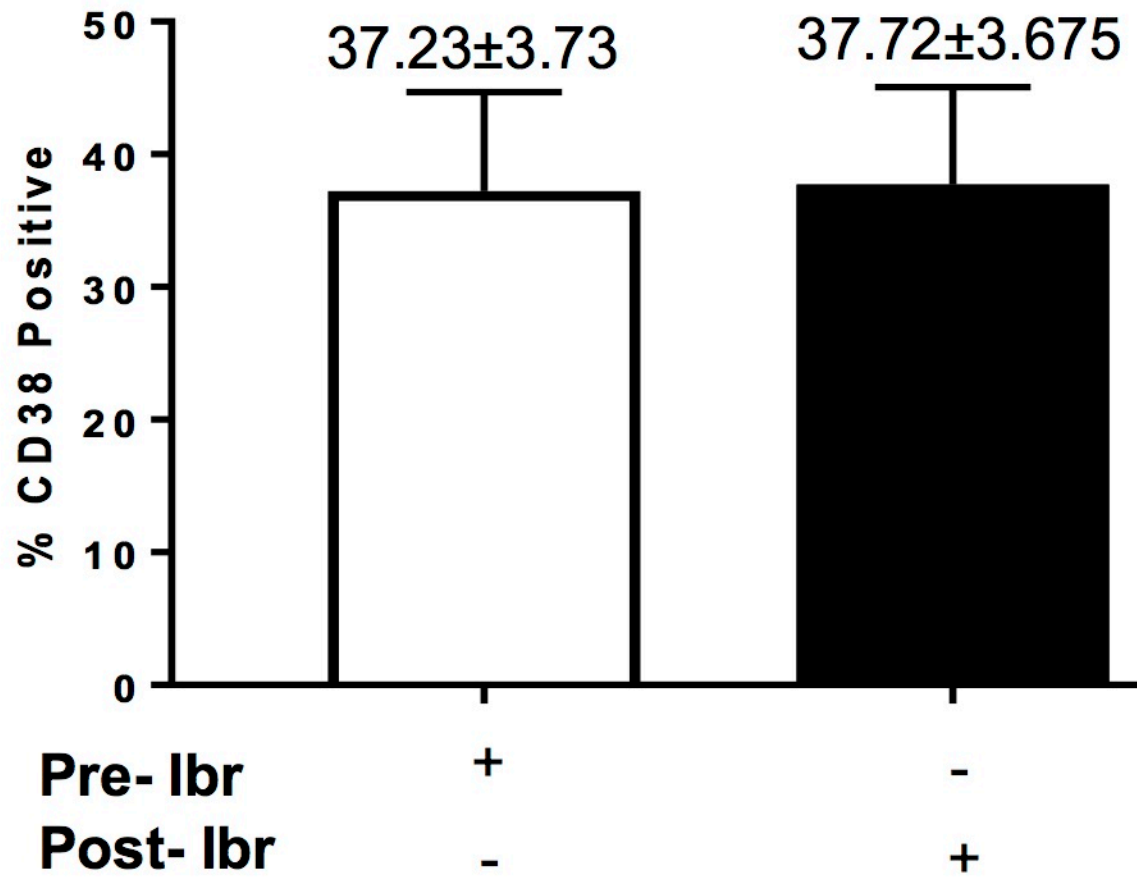

**B.**

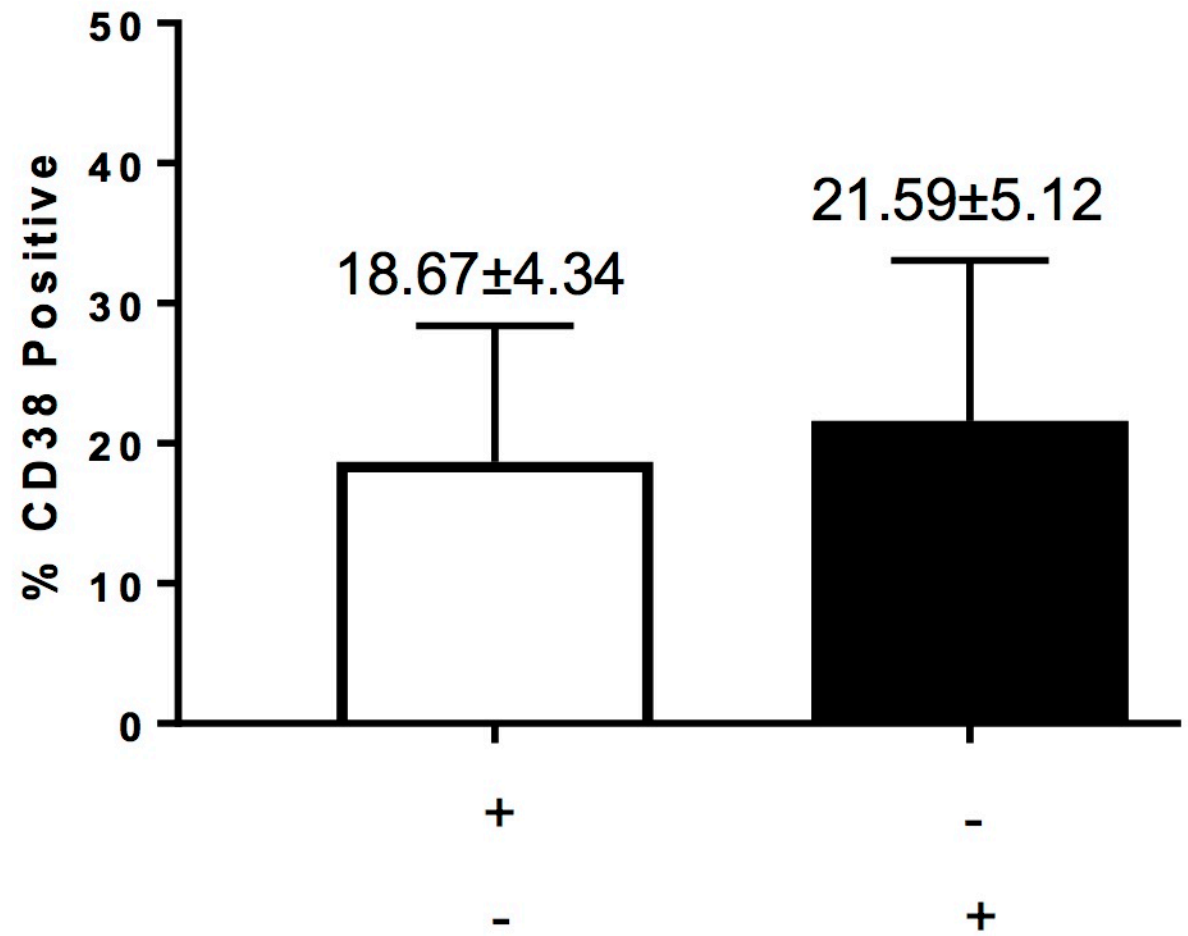

**C.**

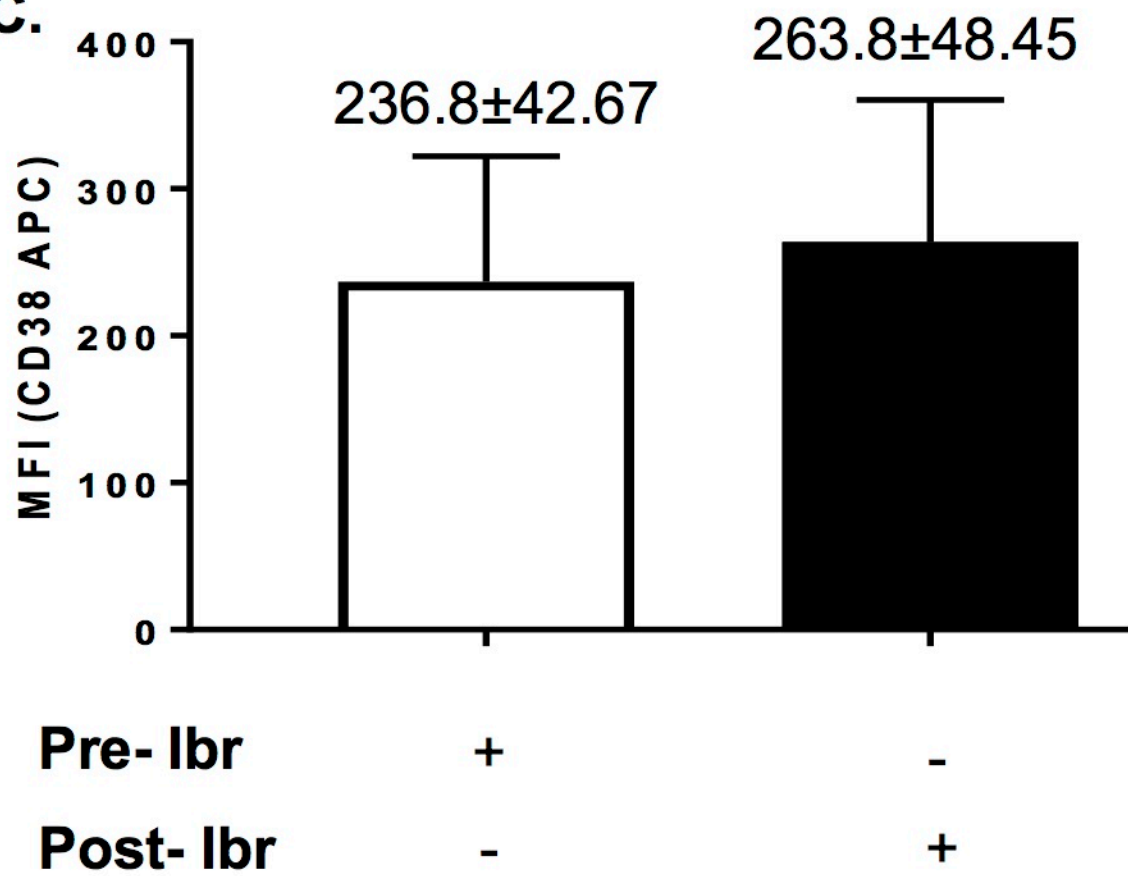

**D.**

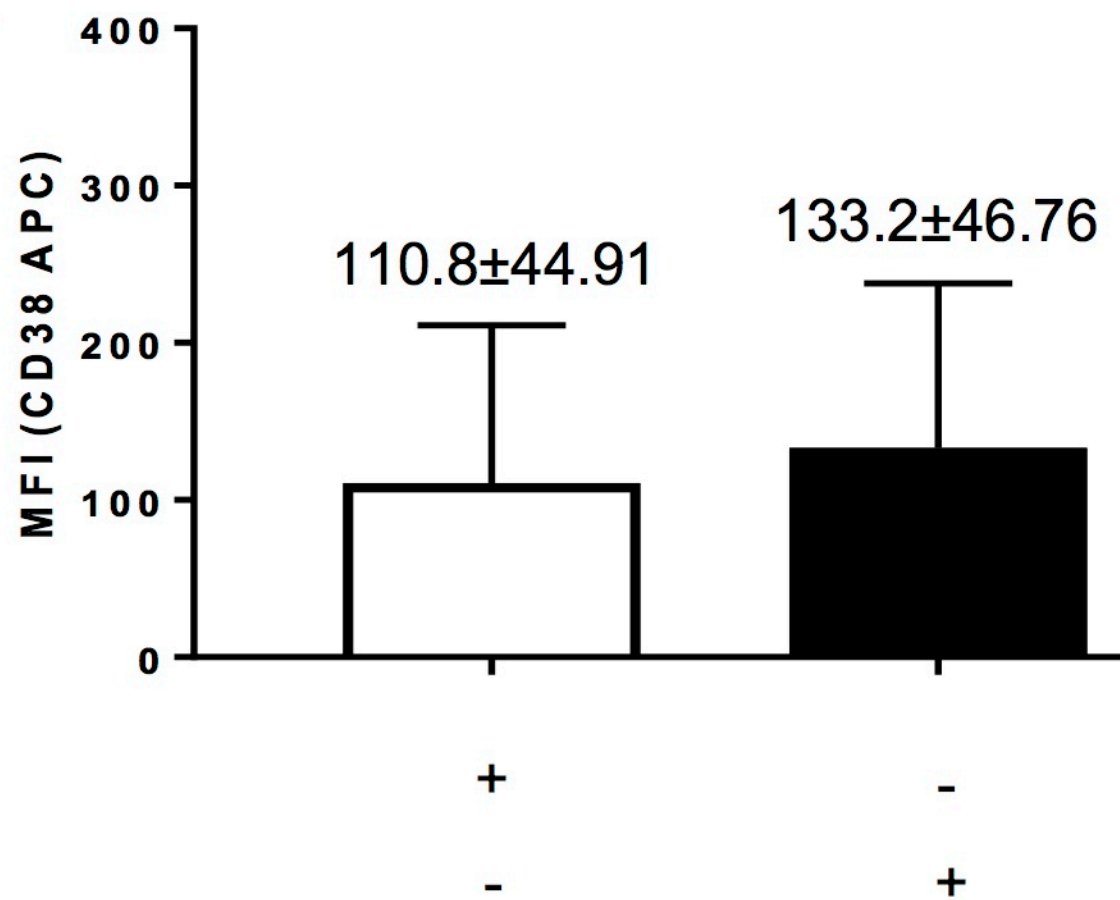

Supplemental Figure 11

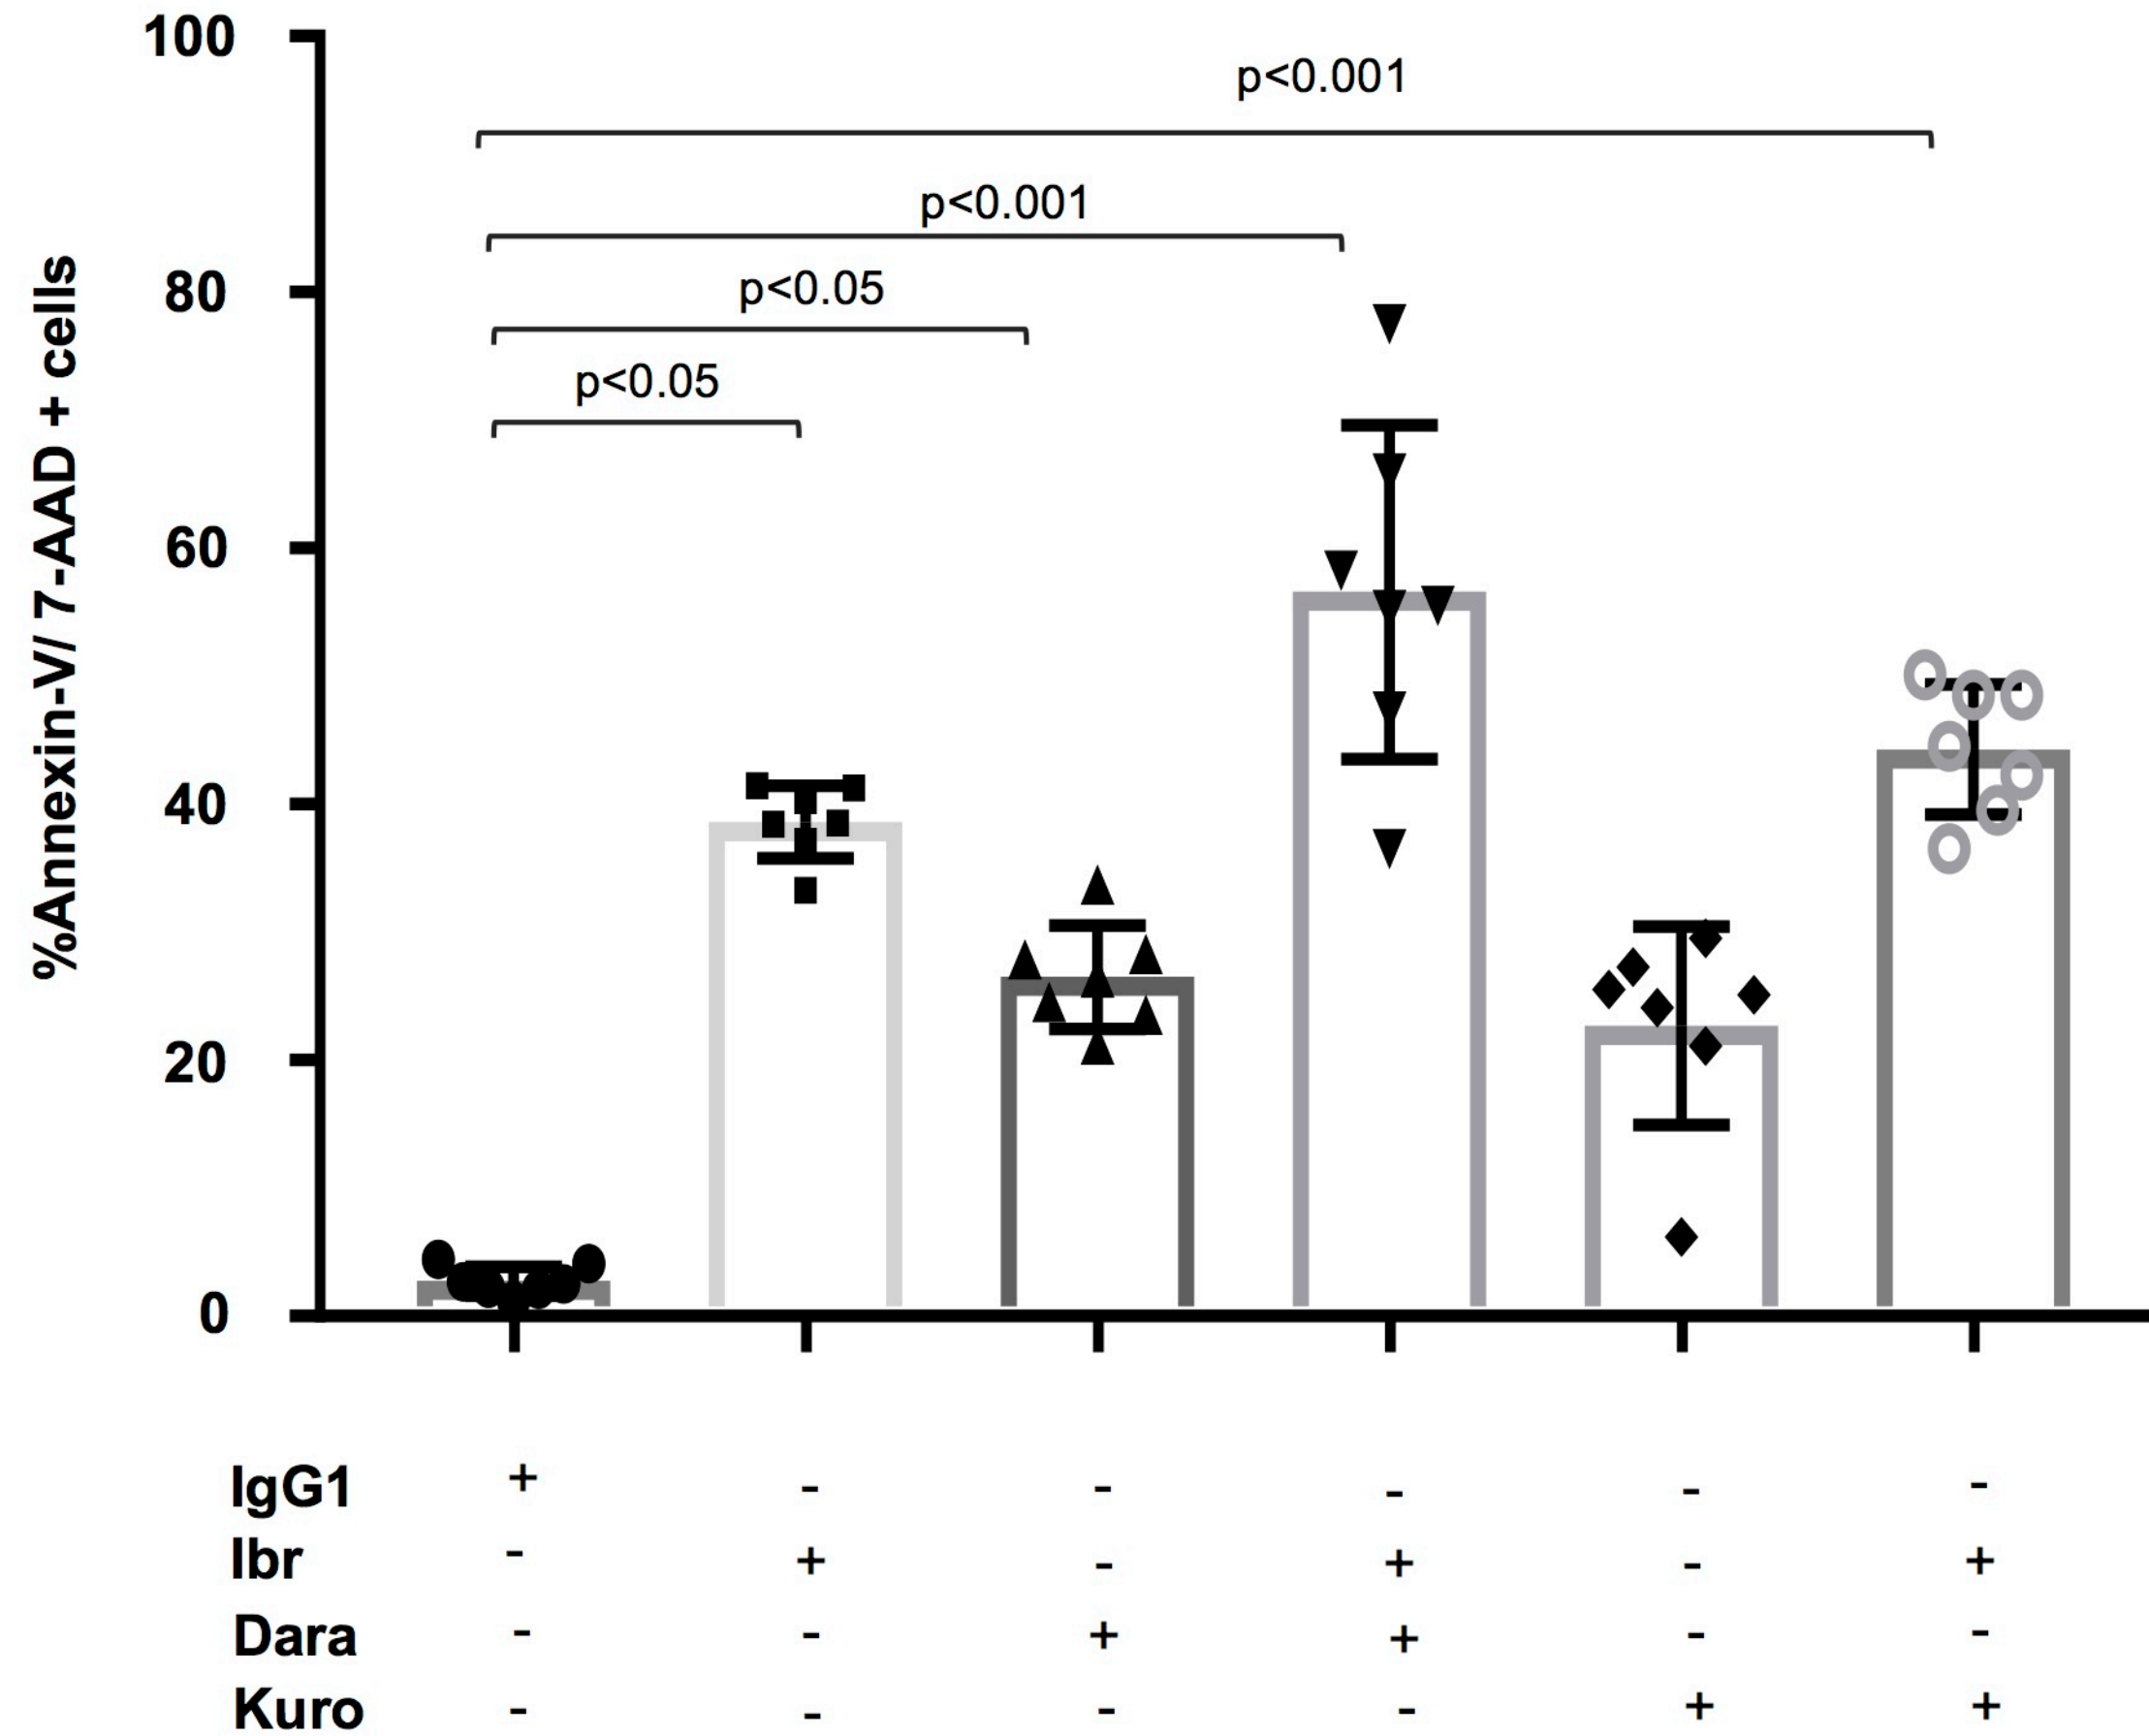

Supplemental Figure 12

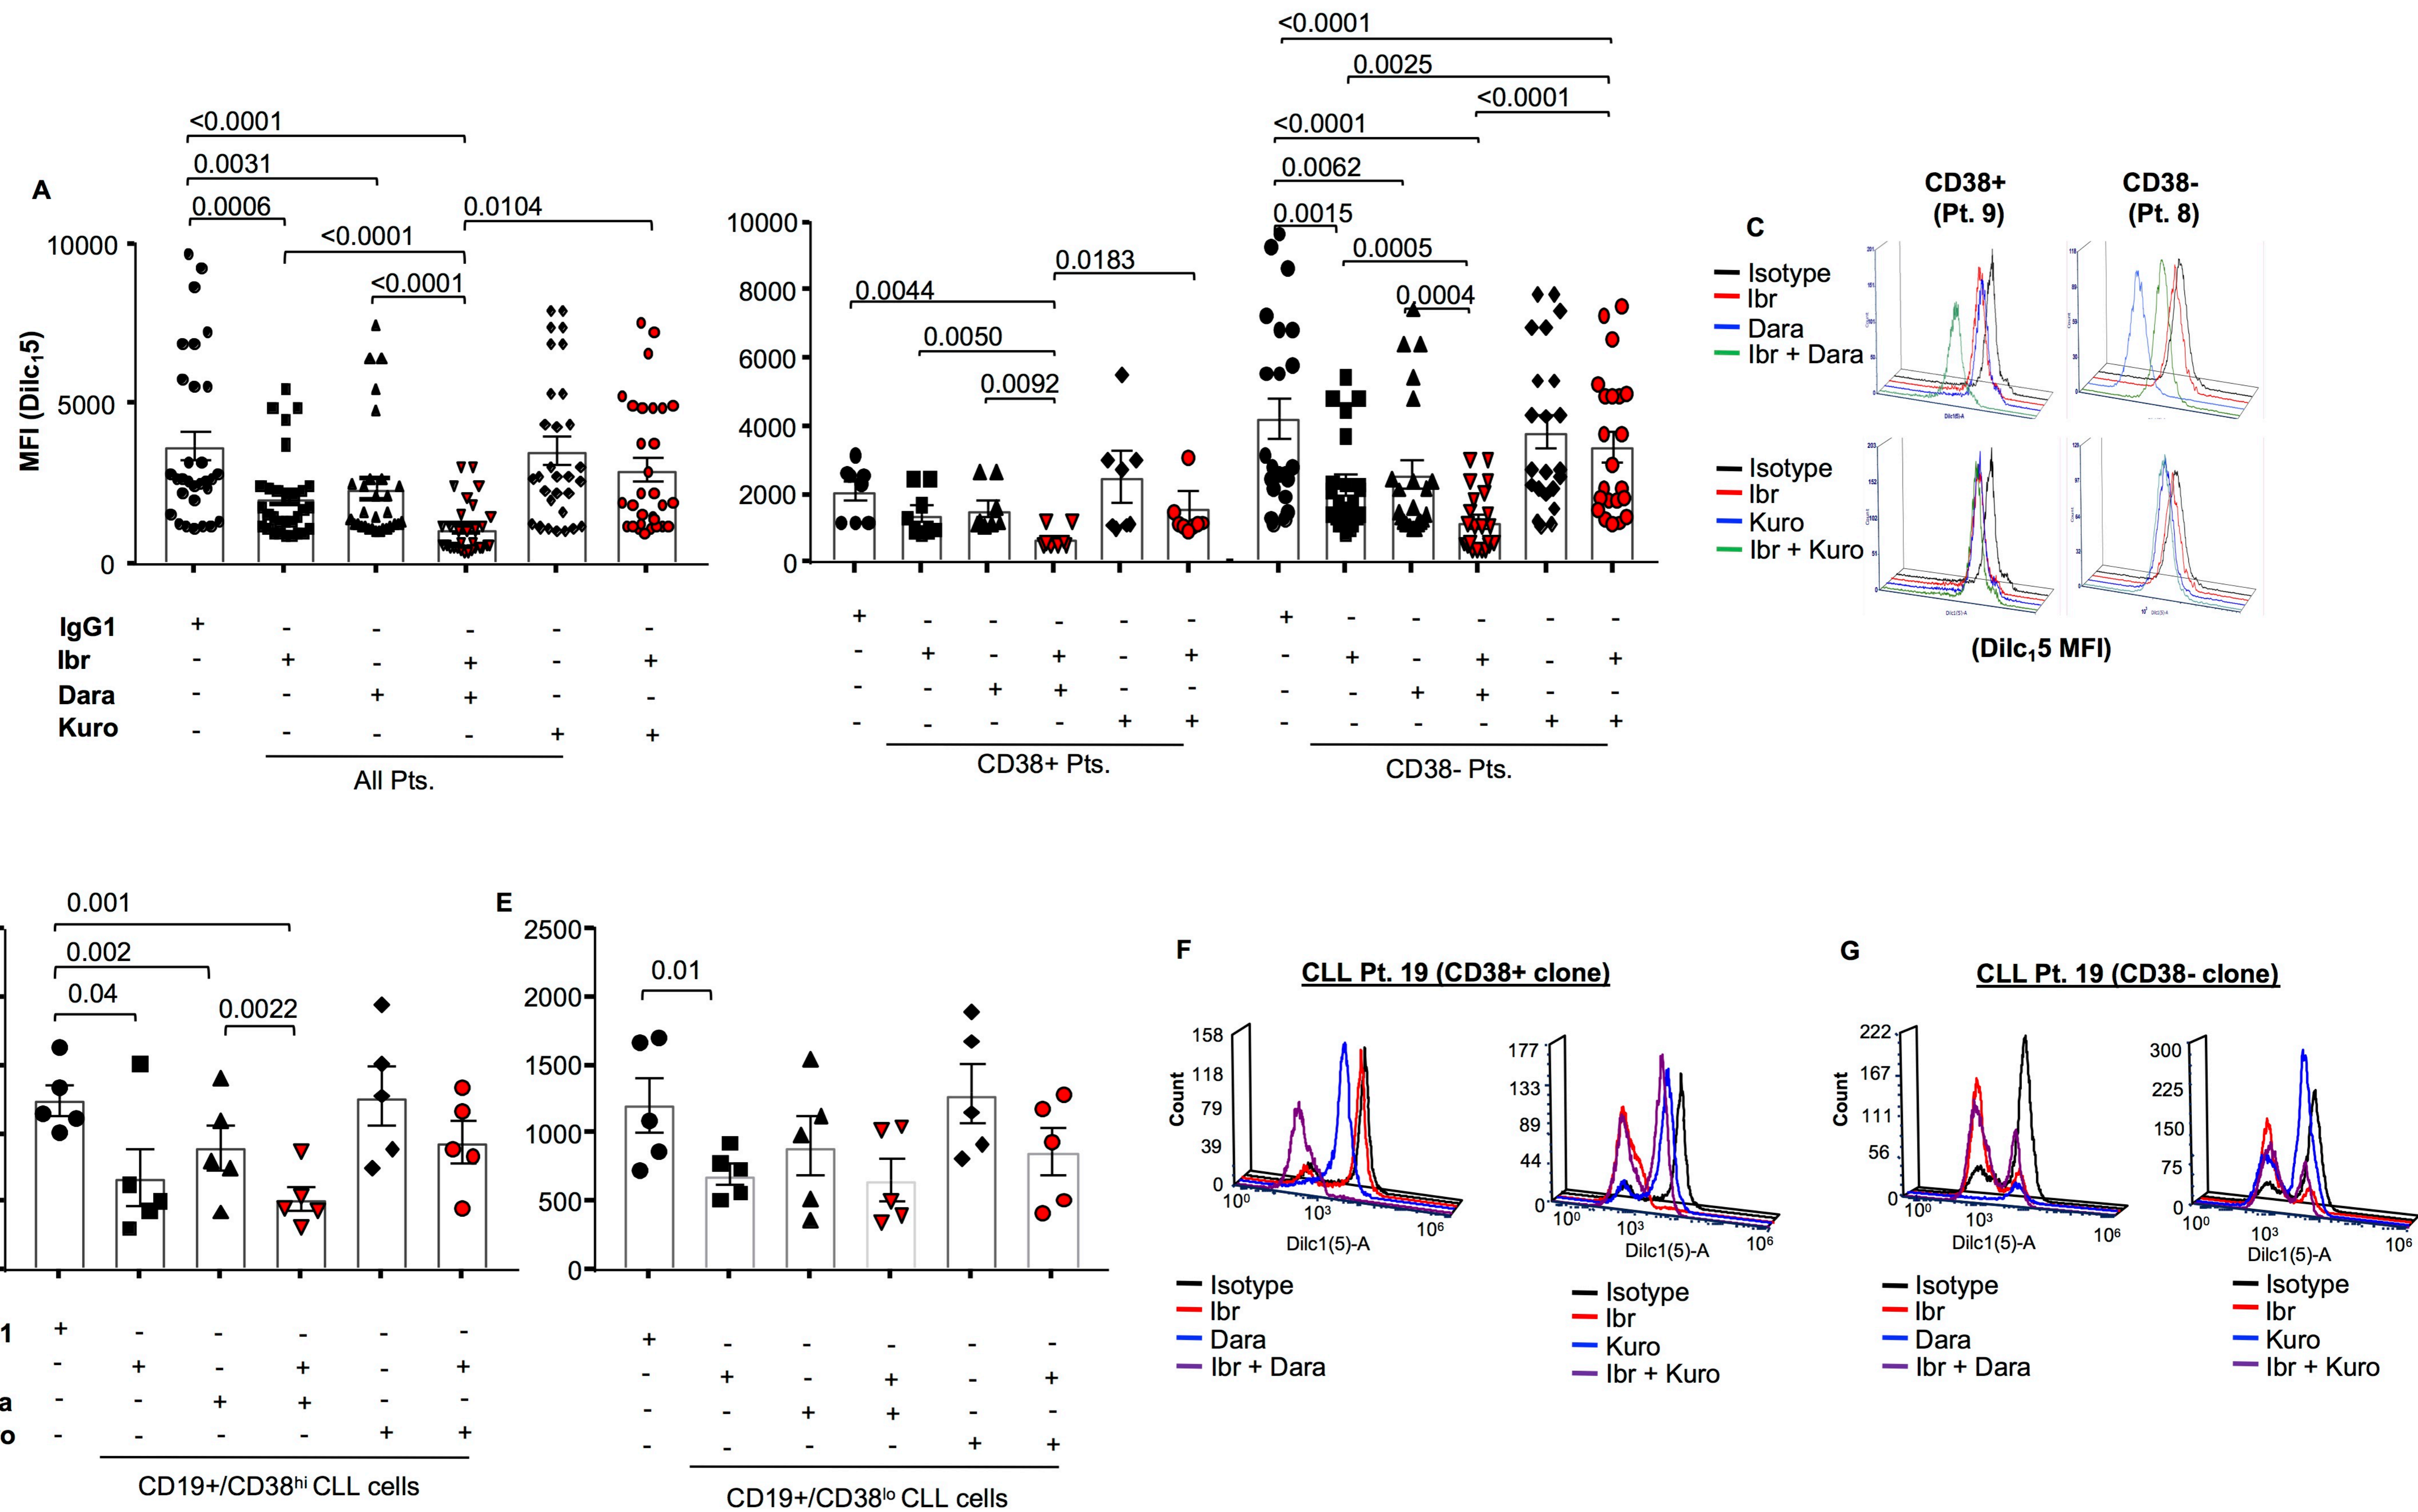

Supplementary Tables.

Table S1. Clinical characteristics of CLL patients whose cells were used in the study.

| Pt. # | Gender | Age | Rai Stage | Tx. status | IgVH       | ZAP-70+ | Del 17P+ | Complex karyotype | Cytogenetics                         | CD38 (% positivity) | CD38 (MFI) | CD38 (sAbc) |
|-------|--------|-----|-----------|------------|------------|---------|----------|-------------------|--------------------------------------|---------------------|------------|-------------|
| 1*    | M      | 79  | 0         | R/R        | mutated    | Yes     | Yes      | No                | RB1 del                              | 47.48               | 369        | 6548        |
| 2*    | F      | 69  | I         | TN         | un-mutated | Yes     | No       | No                | trisomy 12, del 13q                  | 31.11               | 181        | 2654        |
| 3     | M      | 71  | I         | PT         | N/A        | N/A     | No       | Yes               | IgH-BCL2 fusion, trisomy 12, del 13q | 29.02               | 250        | 3162        |
| 4     | M      | 90  | 0         | PT         | N/A        | N/A     | Yes      | No                | trisomy 12                           | 26.34               | 50         | 997         |
| 5     | M      | 67  | I         | PT         | mutated    | Yes     | No       | No                | normal                               | 20.91               | 197        | 3311        |
| 6     | M      | 65  | II        | PT         | mutated    | N/A     | No       | No                | del 13q                              | 9.54                | 31         | 548         |
| 7     | M      | 72  | I         | TN         | un-mutated | Yes     | No       | No                | trisomy 12                           | 10.11               | 111        | 1479        |
| 8     | M      | 58  | 0         | TN         | un-mutated | No      | No       | No                | del 6q                               | 7.54                | 42         | 855         |
| 9*    | F      | 74  | I         | TN         | un-mutated | N/A     | No       | No                | N/A                                  | 38.01               | 313        | 3528        |
| 10    | M      | 76  | 0         | TN         | mutated    | No      | No       | No                | trisomy 12                           | 29.07               | 179        | 2454        |
| 11*   | M      | 66  | III       | TN         | un-mutated | Yes     | No       | No                | del 13q                              | 36.46               | 270        | 3801        |
| 12    | M      | 53  | I         | PT         | un-mutated | Yes     | No       | No                | normal                               | 28.81               | 243        | 3388        |
| 13    | M      | 42  | I         | TN         | un-mutated | Yes     | Yes      | Yes               | del 13q, del 6q, del 11q             | 13.39               | 180        | 2454        |
| 14    | M      | 59  | I         | TN         | mutated    | Yes     | No       | No                | del 11q                              | 18.11               | 144        | 3025        |
| 15    | M      | 64  | 0         | TN         | mutated    | Yes     | No       | No                | del 13q                              | 13.12               | 182        | 2511        |
| 16*   | F      | 69  | I         | TN         | un-mutated | No      | Yes      | Yes               | del 11q, del 13q                     | 46.71               | 568        | 8317        |
| 17*   | M      | 71  | IV        | PT         | un-mutated | Yes     | No       | No                | del 13q                              | 36.1                | 270        | 3801        |
| 18*   | F      | 43  | 0         | TN         | un-mutated | Yes     | No       | No                | del 13q                              | 37.43               | 180        | 3489        |
| 19    | M      | 65  | III       | R/R        | N/A        | Yes     | Yes      | Yes               | del 13q, del 2q, del 11p             | 20.98               | 109        | 1445        |

|                                    |   |    |    |     |            |     |     |     |                                   |       |     |      |
|------------------------------------|---|----|----|-----|------------|-----|-----|-----|-----------------------------------|-------|-----|------|
| <b>20</b>                          | M | 64 | II | TN  | mutated    | No  | No  | No  | del 13q                           | 24.55 | 208 | 2818 |
| <b>21</b>                          | M | 61 | II | R/R | N/A        | Yes | Yes | No  | del 13q                           | 2.53  | 41  | 524  |
| <b>22</b>                          | F | 78 | 0  | TN  | mutated    | No  | No  | No  | normal                            | 6.3   | 59  | 776  |
| <b>23</b>                          | F | 58 | 0  | TN  | mutated    | No  | No  | No  | normal                            | 18.3  | 50  | 630  |
| <b>24</b>                          | F | 50 | IV | PT  | N/A        | Yes | No  | No  | del 13q                           | 15.3  | 151 | 2041 |
| <b>25</b>                          | M | 71 | II | PT  | mutated    | N/A | No  | No  | trisomy 12                        | 23.33 | 109 | 1445 |
| <b>26*</b>                         | M | 68 | IV | R/R | un-mutated | No  | No  | No  | del 11q, del 13q                  | 32.31 | 253 | 3548 |
| <b>27</b>                          | M | 69 | IV | TN  | mutated    | No  | No  | No  | normal                            | 19.78 | 150 | 2041 |
| <b>28</b>                          | M | 80 | 0  | R/R | N/A        | No  | No  | Yes | del 11q, del 13q, IGH-BCL2 fusion | 8.54  | 90  | 1422 |
| <b>29</b>                          | M | 60 | I  | TN  | N/A        | No  | No  | No  | trisomy 12                        | 13.99 | 172 | 2358 |
| <b>30</b>                          | M | 67 | I  | R/R | un-mutated | N/A | No  | No  | normal                            | 14.66 | 214 | 3019 |
| <b><sup>a</sup>31<sup>++</sup></b> | M | 66 | 0  | TN  | mutated    | N/A | No  | No  | del 13q                           | 15.98 | 137 | 2832 |
| <b><sup>a</sup>32</b>              | M | 66 | I  | R/R | un-mutated | Yes | No  | No  | del 13q                           | 8.72  | 113 | 857  |
| <b><sup>a</sup>33*</b>             | F | 69 | I  | TN  | un-mutated | Yes | No  | No  | del 13q                           | 38.54 | 347 | 4142 |
| <b><sup>a</sup>34*</b>             | F | 50 | I  | TN  | N/A        | No  | No  | No  | normal                            | 45.95 | 401 | 5498 |
| <b><sup>a</sup>35</b>              | F | 74 | 0  | R/R | un-mutated | N/A | No  | No  | normal                            | 7.58  | 127 | 1011 |
| <b><sup>a</sup>36</b>              | F | 68 | I  | R/R | N/A        | Yes | Yes | Yes | normal                            | 10.54 | 132 | 954  |

NA, Not available

\* Patients that were designated as CD38+ using the standardized clinical definition where >30% of CD19+/CD5+ CLL clones express CD38.

<sup>31++</sup>, only used in experiments where CLL cells were flow-sorted for purifying CD19+/CD38<sup>hi</sup> and CD19+/CD38<sup>lo</sup> cell populations but were not used in other (non-flow sorted) experiments. And as such his data was not included in the overall correlation analysis or patient demographics summary in Supplementary Table 1.

<sup>a</sup>. Due to low tumor cell volume, these patients CLL cells were not used in cell death (ADCC, CDC, ADCP, apoptosis) assays. Cells were used in either immunoblot assays or experiments where FcγR-cross-linking-mediated cell death was assessed.



**Table S2: Summary of Patient characteristics**

| Variant                                                                                                              | Summary (N=36)     |
|----------------------------------------------------------------------------------------------------------------------|--------------------|
| Median Age (years)                                                                                                   | 67 (range, 42, 90) |
| Gender (Male)                                                                                                        | 25 (76.7%)         |
| Rai stage                                                                                                            |                    |
| 0                                                                                                                    | 11 (30.5%)         |
| I                                                                                                                    | 15 (41.6%)         |
| II                                                                                                                   | 4 (11.1%)          |
| III                                                                                                                  | 2 (5.5%)           |
| IV                                                                                                                   | 4 (11.1%)          |
| IgVH mutation                                                                                                        | 12 (33.3%)         |
| Deletion 17p positive                                                                                                | 7 (19.4%)          |
| Complex karyotype                                                                                                    | 6 (16.6%)          |
| ZAP-70 positive                                                                                                      | 17 (47.2%)         |
| Information was unavailable for 9 patients regarding IgVH mutation status and for 8 patients regarding ZAP70 status. |                    |

\* Notably, these data are from all 36 patients whose samples were used in at least 1 experiment in the study

**Table S3: Correlations between CD38 measures and cell death measures**

| Cell death measure         | Correlation with CD38 MFI |         | Correlation with CD38 sABC |         | Correlation with CD38 percent positivity |         |
|----------------------------|---------------------------|---------|----------------------------|---------|------------------------------------------|---------|
|                            | Spearman's <i>r</i>       | P-value | Spearman's <i>r</i>        | P-value | Spearman's <i>r</i>                      | P-value |
| Single agent treatment (%) |                           |         |                            |         |                                          |         |
| ADCC                       | 0.30                      | 0.11    | 0.32                       | 0.081   | 0.19                                     | 0.32    |
| CDC                        | 0.23                      | 0.22    | 0.29                       | 0.12    | 0.49                                     | 0.006   |
| ADCP                       | 0.49                      | 0.006   | 0.41                       | 0.021   | 0.11                                     | 0.57    |
| Apoptosis                  | 0.39                      | 0.036   | 0.53                       | 0.003   | 0.45                                     | 0.012   |
| Combination treatment (%)  |                           |         |                            |         |                                          |         |
| ADCC                       | 0.38                      | 0.037   | 0.34                       | 0.069   | 0.46                                     | 0.012   |
| CDC                        | 0.41                      | 0.024   | 0.38                       | 0.040   | 0.52                                     | 0.003   |
| ADCP                       | 0.62                      | <0.001  | 0.68                       | <0.001  | 0.37                                     | 0.044   |
| Apoptosis                  | 0.13                      | 0.49    | 0.25                       | 0.18    | 0.28                                     | 0.13    |

P-values result from Spearman's test of correlation. Samples from 30 patients (as listed in Table 1), were used in these analyses.

**Table S4: Associations between patient characteristics and cell death measures after single agent daratumumab treatment**

| Characteristic           | Association with ADCC |         | Association with CDC  |              | Association with ADCP |         | Association with Apoptosis |         |
|--------------------------|-----------------------|---------|-----------------------|--------------|-----------------------|---------|----------------------------|---------|
|                          | Median cell death (%) | P-value | Median cell death (%) | P-value      | Median cell death (%) | P-value | Median cell death (%)      | P-value |
| <b>Age</b>               |                       | 0.58    |                       | <b>0.036</b> |                       | 0.45    |                            | 0.38    |
| ≤ 67 years (N=16)        | 16.5                  |         | 13.4                  |              | 9.7                   |         | 29.3                       |         |
| > 67 years (N=14)        | 10.3                  |         | 19.2                  |              | 8.8                   |         | 26.7                       |         |
| <b>Gender</b>            |                       | 0.13    |                       | 0.57         |                       | 0.60    |                            | 0.20    |
| Male (N=23)              | 10.7                  |         | 14.6                  |              | 9.3                   |         | 27.9                       |         |
| Female (N=7)             | 25.5                  |         | 19.5                  |              | 8.0                   |         | 32.3                       |         |
| <b>Rai stage</b>         |                       | 0.53    |                       | 0.19         |                       | 0.59    |                            | 0.61    |
| 0-I (N=12)               | 14.3                  |         | 17.6                  |              | 9.2                   |         | 28.3                       |         |
| II-IV (N=10)             | 13.6                  |         | 11.4                  |              | 8.9                   |         | 25.5                       |         |
| <b>IgVH mutation</b>     |                       | 0.46    |                       | 0.46         |                       | 0.38    |                            | 0.37    |
| No (N=12)                | 10.7                  |         | 17.6                  |              | 9.6                   |         | 31.3                       |         |
| Yes (N=9)                | 19.7                  |         | 14.0                  |              | 9.0                   |         | 26.1                       |         |
| <b>Del17p</b>            |                       | 0.37    |                       | 0.34         |                       | 0.53    |                            | 0.44    |
| No (N=24)                | 11.4                  |         | 14.3                  |              | 9.2                   |         | 26.7                       |         |
| Yes (N=6)                | 20.3                  |         | 23.0                  |              | 8.7                   |         | 30.8                       |         |
| <b>Complex karyotype</b> |                       | 0.52    |                       | 0.56         |                       | 0.48    |                            | 0.49    |
| No (N=25)                | 12.1                  |         | 14.6                  |              | 9.3                   |         | 27.9                       |         |
| Yes (N=5)                | 15.1                  |         | 19.5                  |              | 8.7                   |         | 23.3                       |         |
| <b>ZAP-70</b>            |                       | 0.93    |                       | 0.25         |                       | 0.11    |                            | 0.095   |
| No (N=10)                | 16.9                  |         | 10.5                  |              | 8.7                   |         | 23.9                       |         |
| Yes (N=14)               | 18.8                  |         | 15.5                  |              | 9.6                   |         | 31.4                       |         |

---

P-values result from a Wilcoxon rank sum test. Numerical variables were dichotomized at the sample median for ease of presentation. Information was unavailable regarding IgVH mutation status (N=7) and ZAP-70 (N=6). Samples from 30 patients (as listed in Table 1), were used in these analyses.

---

**Table S5: Associations between patient characteristics and cell death measures after combination treatment**

| Characteristic    | Association with ADCC |              | Association with CDC  |              | Association with ADCP |         | Association with Apoptosis |         |
|-------------------|-----------------------|--------------|-----------------------|--------------|-----------------------|---------|----------------------------|---------|
|                   | Median cell death (%) | P-value      | Median cell death (%) | P-value      | Median cell death (%) | P-value | Median cell death (%)      | P-value |
| Age               |                       | 0.093        |                       | 0.55         |                       | 0.26    |                            | 0.55    |
| ≤ 67 years (N=16) | 33.7                  |              | 33.0                  |              | 20.4                  |         | 62.8                       |         |
| > 67 years (N=14) | 43.6                  |              | 34.9                  |              | 22.7                  |         | 63.1                       |         |
| Gender            |                       | 0.096        |                       | 0.30         |                       | 0.50    |                            | 0.28    |
| Male (N=23)       | 34.0                  |              | 30.5                  |              | 21.0                  |         | 60.4                       |         |
| Female (N=7)      | 54.6                  |              | 42.9                  |              | 23.5                  |         | 67.3                       |         |
| Rai stage         |                       | 0.98         |                       | 0.88         |                       | 0.14    |                            | 0.43    |
| 0-I (N=12)        | 35.2                  |              | 32.9                  |              | 24.0                  |         | 64.0                       |         |
| II-IV (N=10)      | 42.7                  |              | 35.4                  |              | 16.8                  |         | 59.5                       |         |
| IgVH mutation     |                       | 0.51         |                       | 0.31         |                       | 0.25    |                            | 0.35    |
| No (N=12)         | 36.3                  |              | 35.8                  |              | 24.0                  |         | 65.7                       |         |
| Yes (N=9)         | 32.5                  |              | 34.5                  |              | 17.3                  |         | 61.8                       |         |
| <b>Del17p</b>     |                       | <b>0.021</b> |                       | <b>0.036</b> |                       | 0.90    |                            | 0.59    |
| No (N=24)         | 34.3                  |              | 28.9                  |              | 21.7                  |         | 62.8                       |         |
| Yes (N=6)         | 57.7                  |              | 48.3                  |              | 20.1                  |         | 63.2                       |         |
| Complex karyotype |                       | 0.17         |                       | 0.42         |                       | 0.45    |                            | 0.084   |
| No (N=25)         | 34.6                  |              | 34.5                  |              | 21.0                  |         | 63.8                       |         |
| Yes (N=5)         | 48.3                  |              | 38.0                  |              | 24.0                  |         | 56.6                       |         |
| ZAP-70            |                       | 0.21         |                       | 0.15         |                       | 0.084   |                            | 0.32    |
| No (N=10)         | 34.7                  |              | 26.8                  |              | 17.0                  |         | 60.3                       |         |
| Yes (N=14)        | 45.0                  |              | 36.2                  |              | 24.1                  |         | 64.0                       |         |

---

P-values result from a Wilcoxon rank sum test. Numerical variables were dichotomized at the sample median for ease of presentation. Information was unavailable regarding IgVH mutation status (N=7) and ZAP-70 (N=6). Samples from 30 patients (as listed in Table 1), were used in these analyses.

---

**Table S6. % cell death in CLL patients whose cells were used across various immune-effector mediated and direct cell death assays.**

|       |                     |            |             | Single agent Daratumumab |       |       |           | Ibrutinib + Daratumumab (ID) |           |            |                |
|-------|---------------------|------------|-------------|--------------------------|-------|-------|-----------|------------------------------|-----------|------------|----------------|
| Pt. # | CD38 (% positivity) | CD38 (MFI) | CD38 (sAbc) | %ADCC                    | %CDC  | %ADCP | Apoptosis | %ADCC (ID)                   | %CDC (ID) | %ADCP (ID) | Apoptosis (ID) |
| 1     | 47.48               | 369        | 6548        | 49.93                    | 33.65 | 12.16 | 43.6      | 91.32                        | 64.01     | 30.08      | 62.44          |
| 2     | 31.11               | 181        | 2654        | 5.86                     | 33.65 | 8.02  | 27.28     | 76.32                        | 51.22     | 23.19      | 68.73          |
| 3     | 29.02               | 250        | 3162        | 8.47                     | 12.22 | 6.47  | 23.28     | 48.33                        | 23.4      | 21.24      | 56.62          |
| 4     | 26.34               | 50         | 997         | 5.15                     | 26.51 | 1.9   | 27.9      | 43.8                         | 50.78     | 5.86       | 64.4           |
| 5     | 20.91               | 197        | 3311        | 19.71                    | 16.88 | 10.21 | 36.08     | 33.98                        | 35.47     | 24.18      | 64             |
| 6     | 9.54                | 31         | 548         | 6.26                     | 19.76 | 1.82  | 31.75     | 14.73                        | 45.32     | 11.16      | 60.33          |
| 7     | 10.11               | 111        | 1479        | 6.69                     | 18.89 | 9.66  | 11.16     | 27.91                        | 21.81     | 24.63      | 63.84          |
| 8     | 7.54                | 42         | 855         | 10.25                    | 7.03  | 9.75  | 25.16     | 29.82                        | 12.21     | 16.41      | 76.7           |
| 9     | 38.01               | 313        | 3528        | 30.16                    | 25.82 | 12.66 | 33.96     | 67.46                        | 45.32     | 34.78      | 67.26          |
| 10    | 29.07               | 179        | 2454        | 30.07                    | 22.17 | 8.62  | 17.26     | 34.8                         | 35.18     | 16.56      | 80.4           |
| 11    | 36.46               | 270        | 3801        | 26.51                    | 16.35 | 9.73  | 46.8      | 50.78                        | 42.91     | 14.23      | 81.9           |
| 12    | 28.81               | 243        | 3388        | 10.68                    | 12.82 | 11.75 | 29.9      | 33.39                        | 23.22     | 19.71      | 58.94          |
| 13    | 13.39               | 180        | 2454        | 10.74                    | 7.59  | 9.62  | 32.85     | 31.78                        | 37.98     | 23.97      | 63.91          |
| 14    | 18.11               | 144        | 3025        | 29.36                    | 14.64 | 6.7   | 71.3      | 22.14                        | 19.29     | 26.87      | 80.84          |
| 15    | 13.12               | 182        | 2511        | 17.81                    | 13.96 | 13.23 | 15.73     | 32.52                        | 36.83     | 25.17      | 56.52          |
| 16    | 46.71               | 568        | 8317        | 35.54                    | 19.54 | 8.75  | 42.76     | 75.06                        | 45.88     | 34.63      | 64.21          |
| 17    | 36.1                | 270        | 3801        | 5.52                     | 11.61 | 9.6   | 45.86     | 72.69                        | 24.56     | 37.83      | 77.97          |
| 18    | 37.43               | 180        | 3489        | 21.83                    | 21.44 | 7.27  | 71.27     | 39.25                        | 35.41     | 27.21      | 76.08          |
| 19    | 20.98               | 109        | 1445        | 15.14                    | 26.51 | 8.7   | 12.18     | 60.58                        | 50.78     | 16.18      | 35.21          |
| 20    | 24.55               | 208        | 2818        | 21.67                    | 6.95  | 4.18  | 22.66     | 34.58                        | 26.46     | 21.01      | 47.94          |

|           |       |     |      |       |       |       |       |       |       |       |       |
|-----------|-------|-----|------|-------|-------|-------|-------|-------|-------|-------|-------|
| <b>21</b> | 2.53  | 41  | 524  | 25.47 | 7.03  | 5.66  | 28.72 | 54.82 | 14.56 | 14.68 | 58.43 |
| <b>22</b> | 6.3   | 59  | 776  | 25.54 | 8.89  | 3.07  | 26.1  | 42.95 | 20.54 | 11.62 | 46.72 |
| <b>23</b> | 18.3  | 50  | 630  | 9.36  | 9.8   | 3.41  | 32.25 | 16.07 | 19.91 | 4.87  | 61.78 |
| <b>24</b> | 15.3  | 151 | 2041 | 31.48 | 10.41 | 14.44 | 23.15 | 54.58 | 42.91 | 23.49 | 81.79 |
| <b>25</b> | 23.33 | 109 | 1445 | 7.35  | 10.65 | 9     | 20.49 | 27.72 | 19.21 | 16.3  | 60.36 |
| <b>26</b> | 32.31 | 253 | 3548 | 12.05 | 16.88 | 8.77  | 27.9  | 19.3  | 36.2  | 22.18 | 42.19 |
| <b>27</b> | 19.78 | 150 | 2041 | 5.75  | 11.21 | 9.31  | 15.73 | 30.81 | 34.52 | 17.32 | 58.72 |
| <b>28</b> | 8.54  | 90  | 1422 | 25.91 | 21.92 | 8.436 | 12.93 | 43.45 | 22.09 | 24.23 | 20.14 |
| <b>29</b> | 13.99 | 172 | 2358 | 10.4  | 7.85  | 10.68 | 12.18 | 35.68 | 27.21 | 15.7  | 81.9  |
| <b>30</b> | 14.66 | 214 | 3019 | 8.68  | 18.21 | 12.68 | 28.72 | 20.02 | 30.54 | 24.08 | 57.88 |
